1 **Manuscript title: Molecular Diversity of Intrinsically Photosensitive Ganglion Cells**

2

3 **Authors:**

4 Daniel Berg<sup>1,2</sup>, Katherine Kartheiser<sup>2</sup>, Megan Leyrer<sup>2</sup>, Alexandra Saali<sup>2</sup>, David Berson<sup>2</sup>

5

6 1. Molecular Biology Program

7 2. Department of Neuroscience

8 Brown University, Providence, RI 02912

9

10 Correspondence to: David Berson ([david\\_berson@brown.edu](mailto:david_berson@brown.edu))

11

12 WORD COUNT: **Abstract** (148 words); **Intro** (784 words); **Results** (5159); **Discussion** (2657)

13

14 **Abstract**

15 Intrinsically photosensitive retinal ganglion cells (ipRGCs) are rare mammalian photoreceptors  
16 essential for non-image-forming vision functions, such as circadian photoentrainment and the  
17 pupillary light reflex. They comprise multiple subtypes distinguishable by morphology, physiology,  
18 projections, and levels of expression of melanopsin (Opn4), their photopigment. The molecular  
19 programs that differentiate ipRGCs from other ganglion cells and ipRGC subtypes from one  
20 another remain elusive. Here, we present comprehensive gene expression profiles of early  
21 postnatal and adult mouse ipRGCs purified from two lines of reporter mice marking different sets  
22 of ipRGC subtypes. We find dozens of novel genes highly enriched in ipRGCs. We reveal that  
23 *Rasgrp1* and *Tbx20* are selectively expressed in subsets of ipRGCs, though these molecularly  
24 defined groups imperfectly match established ipRGC subtypes. We demonstrate that the ipRGCs  
25 regulating circadian photoentrainment are unexpectedly diverse at the molecular level. Our

26 findings reveal unexpected complexity in gene expression patterns across mammalian ipRGC  
27 subtypes.

28

## 29 **Introduction**

30 Many unique attributes distinguish intrinsically photosensitive RGCs from conventional  
31 RGCs. Only ipRGCs express the blue-light sensitive photopigment melanopsin (OPN4), which  
32 renders them autonomously light-sensitive. They violate the usual stratification rule in which ON-  
33 type RGCs deploy their dendrites only in the inner (proximal) half of the inner plexiform layer; their  
34 inputs from ON bipolar cells are atypical (Dumitrescu et al., 2009; Hoshi et al., 2009; Kim et al.,  
35 2010). Whereas most RGCs direct their entire output through the optic nerve, some ipRGCs  
36 modulate intraretinal processing, through dopaminergic (Zhang et al., 2008; Xue et al., 2011) and  
37 other amacrine cells (Reifler et al., 2015; Sabbah et al., 2017) and spontaneous retinal waves  
38 during the early postnatal period (Renna et al., 2011). Additionally, ipRGCs appear more resistant  
39 than RGCs overall to various sorts of insults, including intraocular hypertension, optic nerve injury,  
40 glutamate-induced excitotoxicity, and glaucoma (Cui et al., 2015). Functionally, ipRGCs are  
41 unique among RGCs in their ability to encode overall light intensity for extended periods (Wong,  
42 2012). This tonic luminance signal is transmitted to specific brain targets for a variety of functions.  
43 Projections to the hypothalamus mediate photoentrainment of circadian rhythms, while those to  
44 the midbrain to drive pupillary constriction. These outputs derive from molecularly distinct ipRGC  
45 subtypes.

46 The distinctive structural and functional properties of ipRGCs must ultimately be traceable  
47 to different patterns of gene expression. However, there is very little information on what these  
48 differences might be. For example, the basic molecular framework of the melanopsin  
49 phototransduction cascade, a major defining feature of ipRGCs, has only begun to be identified  
50 (Hughes et al., 2012) and the precise phototransduction mechanisms remain poorly  
51 characterized. More generally, very little is known about the developmental molecular

52 mechanisms that direct certain immature RGCs to an ipRGC fate, or that maintain the distinctive  
53 features of ipRGCs throughout maturity. Thus, there is ample motivation for comparing the  
54 transcriptional profiles of ipRGCs as compared to those of conventional RGCs.

55         The ipRGCs consist of at least six anatomically distinct retinal subtypes, termed M1-M6.  
56 These which differ in their level of melanopsin expression, visual response properties, dendritic  
57 stratification, axonal projections, and contributions to light-modulated behavioral responses  
58 (Schmidt et al., 2011). Little is known about the gene regulatory programs that differentiate and  
59 maintain the specialized properties of individual ipRGC subtypes. M1 ipRGCs have been further  
60 subdivided based on their expression of the transcription factor Pou4f2 (Brn3b) (Chen et al., 2011;  
61 Jain et al., 2012). M1 ipRGCs that innervate the suprachiasmatic nucleus (SCN) do not express  
62 Brn3b, while those that project to other M1-cell targets, such as the olivary pretectal nucleus  
63 (OPN), do express this transcription factor (Chen et al., 2011). Indeed, ablation of Brn3b-positive  
64 ipRGCs severely impairs the pupillary light reflex, but leaves circadian photoentrainment intact  
65 (Chen et al., 2011). There is surely additional molecular diversity among ipRGCs, both within and  
66 between established ipRGC subtypes, and this further motivates the present study.

67         Previous attempts to develop a “molecular parts list” for ipRGCs through gene expression  
68 profiling of adult ipRGCs have been limited by the extreme heterogeneity of retinal tissue, and the  
69 fragility of mature retinal neurons, and the minuscule amount of genetic material from ipRGCs,  
70 which comprise far fewer than 1% of all retinal neurons (Lobo et al., 2006; Heiman et al., 2008;  
71 Sanes and Masland, 2015). Some progress has been made by purifying ipRGCs from  
72 enzymatically dissociated retinas using either anti-melanopsin immuno-panning or fluorescence-  
73 activated cell sorting (FACS) of genetically-labeled fluorescent ipRGCs. However, prior efforts  
74 have been limited by low yield and inclusion of contaminating cell populations such as rods  
75 (Hartwick et al., 2007; Peirson et al., 2007; Siegert et al., 2012).

76         Here we conducted a thorough unbiased transcriptomic analysis of ipRGCs by purifying  
77 GFP-tagged ipRGCs through a combination of FACS and immunoaffinity and comparing this the

78 transcriptional profile of GFP-negative RGCs. We did this in two different mouse lines, marking  
79 partially overlapping subsets of ipRGCs. One was a BAC transgenic reporter (*Opn4-GFP*), which  
80 fluorescently labels M1-M3 ipRGCs (see Methods) and the other was a *Opn4-Cre;Z/EG* reporter  
81 system, which labels all ipRGC subtypes, M1-M6 (Schmidt et al., 2008; Ecker et al., 2010;  
82 Quattrochi et al., 2018; Stabio et al., 2018). The specificity and purity achieved by our approach  
83 is validated by the substantial enrichment in the ipRGC samples of known molecular markers of  
84 ipRGCs and by the fact that transcripts selectively expressed in potential contaminating cell types  
85 are generally absent. We identified more than 75 new gene candidates expressed much more  
86 highly in adult ipRGCs than in other RGCs. We validate two of the new molecular markers at the  
87 protein level: the Ras GEF *Rasgrp1* and the T-box transcription factor *Tbx20* and relate these to  
88 established ipRGC subtypes and patterns of central projection.

89

## 90 **Results**

91 We enzymatically dissociated retinas from melanopsin-reporter mice, selected for RGCs  
92 by anti-Thy1 immunoaffinity, and sorted these into presumptive ipRGC and conventional  
93 ganglion-cell (cRGC) pools by FACS based on the fluorescent labeling of ipRGCs (see Methods,  
94 Figure 1A). We then compared gene expression in these ipRGC-enriched and cRGC-enriched  
95 cell samples to identify genes differentially expressed in ipRGCs as compared to other ganglion  
96 cells. We used two strains of melanopsin-reporter mice (see Methods). One of these was a BAC  
97 transgenic mouse (here termed *Opn4-GFP*) in which retinal GFP expression is apparently  
98 restricted to ipRGCs of subtypes M1, M2 and M3 (see Methods; personal communication R.  
99 Maloney and L. Quattrochi). This is presumably because expression of the reporter is coupled to  
100 expression of melanopsin, which is highest in this subset of ipRGCs. The other melanopsin  
101 reporter mouse was obtained by crossing a knock-in mouse in which *Cre* replaces *Opn4*  
102 (*Opn4<sup>cre/cre</sup>*) with a Cre reporter strain (*Z/EG*). The resulting Cre-driven labeling of melanopsin-  
103 expressing cells is more sensitive than in the other strain of reporter mice, and labels all known

104 types of ipRGCs, M1-M6, while labeling few if any conventional RGCs (cRGCs) (Ecker et al.,  
105 2010; Estevez et al., 2012; Quattrochi et al., 2018; Stabio et al., 2018) (Figure 1A; see Methods).

106

### 107 **Cell composition and purity of isolated ipRGCs and conventional RGCs**

108 The relationship among the transcriptional profiles of ipRGC and cRGC samples across  
109 replicates are illustrated in the multidimensional scaling (MDS) plots of Fig. 1B. These show the  
110 relationship between all pairs of samples (one of ipRGCs, the other of cRGCs) based on a count-  
111 specific pairwise distance measure (Anders et al., 2013) (Figure 1B). These sample pairs were  
112 clearly separated along the first dimension, indicating pronounced differences in overall gene-  
113 expression patterns between ipRGC and cRGC samples. Samples of ipRGCs and cRGCs derived  
114 from the same retina and processed in parallel tended to be closely spaced along the second  
115 dimension, indicating greater similarity within than across replicates. This may reflect slight  
116 differences in overall genetic makeup of mice contributing to each pool, since both strains used  
117 were on a mixed genetic background, or to slight technical differences in the acquisition and  
118 processing of RNA from one run to the next.

119 Transcriptional data offer broad internal evidence for the efficacy of purification of cell  
120 samples. As expected, the *Opn4* (melanopsin) gene was among the genes much more highly  
121 expressed in ipRGCs than in cRGCs. For example, *Opn4* was enriched 40-fold in adult ipRGCs  
122 purified from *Opn4-GFP* mice, and this was highly significant, at  $q < 1 \times 10^{-55}$  false discovery rate  
123 (FDR). Though *Opn4* expression was detected in cRGCs at modest levels (Figure S1), this was  
124 expected, because some ipRGCs lack GFP expression in both melanopsin reporter lines (*Opn4-*  
125 *GFP* and *Opn4-cre/GFP*), and these would have been pooled with cRGCs during the FACS  
126 procedure.

127 Transcripts of other genes known to be expressed in ipRGCs were also enriched in the  
128 ipRGC pool relative to the cRGC pool (FDR < 0.05, significantly expressed in ipRGC samples,  
129 and absent or weakly expressed in cRGC samples). Among these genes were *Adcyap1* (pituitary

130 adenylylating cyclase activating polypeptide; PACAP), *Tbr2*, (*Eomesodermin*), *Trpc7* and, to a lesser  
131 extent, *Trpc6* (Hannibal et al., 2004; Xue et al., 2011; Sand et al., 2012; Mao et al., 2014; Sweeney  
132 et al., 2014). Taken together, these results demonstrate that mRNA isolated from purified ipRGC  
133 samples were enriched as expected for transcripts for genes that are known to be differentially  
134 expressed in ipRGCs.

135 In the purified ipRGC samples, we found little or no evidence of contamination by  
136 transcripts from other retinal cell types. For example, transcript levels were very low for rod and  
137 cone opsins, for the amacrine-specific marker ChAT, for several bipolar markers (*Otx2*; *Vsx2*;  
138 *Grm6*; *Trpm1*), and for markers of astrocytes, microglial and vascular cells (Figure S1). Several  
139 transcripts suitable for assessing potential contamination from Müller glia (*Glul*, *Vim*) were present  
140 at surprisingly high levels in the purified ipRGC samples, suggesting that these glial cells may  
141 contaminate the transcriptional picture to some degree.

142 In general, the cRGC samples were relatively less pure than the ipRGCs samples by this  
143 measure. A particularly informative transcript for assessing such contamination is that for the  
144 rhodopsin gene (*Rho*), because rods are by far the most common neuronal type in the mouse  
145 retina and express *Rho* at very high levels. Rhodopsin transcripts were significantly (150-fold)  
146 more abundant in the cRGC samples than in ipRGC samples (Figure Supplement 1), whether  
147 isolated from *Opn4-GFP* or *Opn4-Cre/GFP* adult reporter mice (FDR < 6 x 10<sup>-9</sup>). Evidently, the  
148 second isolation step in which GFP<sup>+</sup> positive cells were isolated by FACS from the purified RGC  
149 pool was a key factor in the greater purity of the ipRGC sample. Similarly, transcripts associated  
150 with bipolar cells and Müller glial cells were generally more abundant in cRGC than ipRGC  
151 samples. For example, the cRGCs had relatively high expression of the known Müller glia markers  
152 *Glul*, *Apoe*, *Aqp4*, and *Vim*, generally higher than in the ipRGC pool (Figure S1). Contamination  
153 of adult cRGC samples by other cell types may explain why most RGC markers, such as *Rbpms*  
154 and *Sncg* (Soto et al., 2008; Rodriguez et al., 2014), were less abundant in the cRGC cell pool  
155 than in the ipRGC pool. However, the data suggest that contamination in the cRGC pool was not

156 uniform across retinal cell types. Amacrine-specific transcripts were no more abundant overall in  
157 cRGCs than in ipRGCs, and microglial and vascular markers were essentially absent, as in  
158 ipRGCs.

159 In immature mice (P5; *Opn4-GFP*), contamination of cRGC samples by non-RGC  
160 transcripts appeared more modest than in adults. The major sources of contamination (rods and  
161 Müller glia) are still being born and undergoing early-stage differentiation at this age, and this  
162 would presumably depress the abundance of their cell-type-specific transcripts (Young, 1985;  
163 Morrow et al., 1998; Matsushima et al., 2011).

164 To summarize, this analysis suggests that all samples were relatively free of  
165 contamination by most other retinal cell types, and that the ipRGC samples were particularly pure.  
166 Contamination of the cRGC samples appears to derive mainly from Müller cells and strongly  
167 expressed genes in rods. Though this must be factored into the analysis, our primary focus was  
168 on genes more strongly expressed in ipRGCs than in cRGCs, and this difference seems unlikely  
169 to be affected by the modest contamination of the cRGC pool.

170

### 171 **Genes differentially expressed in ipRGCs**

172 Comparing the abundance of transcripts in the ipRGC and cRGC pools, we identified over  
173 75 genes that were differentially elevated expression in ipRGCs (as marked by one or both  
174 melanopsin-reporter lines) relative to cRGCs. Briefly, identification of differentially expressed  
175 genes in ipRGCs relied on the following stringent criteria: 1) low false discovery rate with high  
176 fold-change, 2) corroboration of differential expression across both ipRGC reporters, and 3)  
177 absence of gene expression in cRGC samples (see Methods). The identified differentially  
178 expressed genes are diverse, and most have not been previously identified as ipRGC-enriched  
179 (Figure 2; see Methods). Here, we survey some of these genes, grouped by their functional  
180 features (Figure 2).

181

182 1. **Transcription factors**

183 Transcription factors, by regulating other genes, help to generate and maintain ipRGC  
184 identity. We noted above that the T-box transcription factor *Tbr2* was much more strongly  
185 expressed in adult ipRGCs than in cRGCs, as expected (Sweeney et al., 2014). *Tbr2* is best  
186 known for its key role in early retinal development. Its expression in adult retina is far more  
187 restricted, but it remains expressed in the majority of ipRGCs. A second T-box transcription factor,  
188 *Tbx20*, was similarly enriched (Figure 2). *Tbx20* has not been previously linked to adult retinal  
189 function, but we will show that it too is quite selectively expressed in ipRGCs. Additionally, four  
190 other transcription factors, *Irx6*, *Dmrtb1*, *Nr4a3*, and *Pou6f2*, were differentially expressed in adult  
191 ipRGCs. Most of these genes serve as broad lineage determinants in early retinal development  
192 (Zhou et al., 1996; Star et al., 2012). Other highly expressed genes included the neuron-derived  
193 orphan receptor 1 *Nor1* (*Nr4a3*), which codes for a nuclear receptor, and *Elavl2* gene, which  
194 codes for a RNA-binding protein important for mRNA metabolism and neuronal differentiation  
195 (Fornaro et al., 2007; Hinman and Lou, 2008). Pathway analysis (DAVID) of differentially  
196 expressed genes in ipRGCs suggested specialization in heparan sulfate biosynthesis, including  
197 *Hs3st4*, *Hs3st2*, *Hs6st2*, *Ndst4*, and *Gpc5* (Figure 2).

198

199 2. **Synaptic transmission**

200 Some of the genes differentially expressed in ipRGCs have known roles in regulating  
201 synaptic function, especially at presynaptic sites. Among others, these genes include *Sh3gl3*,  
202 *Entpd1*, *Rab3b*, *Baiap3*, *Chl1*, *Sh3gl3*, and *Adra2a* (Figure 2).

203

204 3. **Growth factors and neuropeptides**

205 Multiple growth factors and neuropeptides were also differentially expressed in adult ipRGCs.  
206 These include *Bmp7*, *Fgf1*, *Gal*, *Gdf6*, *Grem1*, *Nmb* and *Nppb* (Figure 2).

207



#### 208 4. **Receptors and channels**

209 Multiple genes encoding diverse surface receptors were differentially expressed in ipRGCs  
210 (Figure 2—figure supplement 2). For example, expression data suggest that ionotropic nicotinic  
211 acetylcholine receptors in ipRGCs may be composed of  $\alpha 3$ ,  $\alpha 4$ ,  $\alpha 6$ ,  $\beta 2$  and  $\beta 3$  subunits (Figure  
212 2—figure supplement 2), although the  $\alpha 3$  and  $\alpha 4$  transcripts were borderline for differential  
213 expression in ipRGCs. In agreement with previous studies, we found that ipRGCs expressed the  
214 *Drd1* dopamine receptor, but had low levels of *Drd2* expression (Van Hook et al., 2012). Several  
215 serotonin receptor genes (*Htr1b*, *Htr1d*, and *Htr5a*) were modestly enriched in ipRGCs. The  
216 ipRGCs were also found to express many glutamate receptors subunits, but only one of these -  
217 the NMDA receptor subunit 3A (*GRIN3A*) - was differentially expressed relative to other adult  
218 RGCs. The mu opioid receptor gene *Oprm1* is differentially expressed in ipRGCs; it could regulate  
219 their light responses interacting with L-type calcium channels, which carry the majority of light-  
220 evoked inward calcium current in ipRGCs (Moises et al., 1994; Diaz et al., 1995; Doğrul et al.,  
221 2001; Hartwick et al., 2007). Our data appear at odds with earlier reports that M1 and M4 ipRGCs  
222 express the melatonin receptor genes *Mtnr1a* and *Mtnr1b* (Sengupta et al., 2011; Pack et al.,  
223 2015; Sheng et al., 2015). Additionally, *Kcnh1*, also known as ether-a-go-go (*Eag1*), was  
224 differentially expressed in ipRGCs (Figure 2). *Kcnh1* is a voltage-gated K<sup>+</sup> channel that has been  
225 shown to be crucial for the generation of dark current in the inner segment of rods (Frings et al.,  
226 1998), but may normally regulate other neuronal functions in ipRGCs (Martin et al., 2008).

227

#### 228 5. **Cell adhesion**

229 Genes encoding for several cell adhesion molecules were differentially expressed in  
230 ipRGCs (Figure 2—figure supplement 3B). For example, the cell adhesion molecule *DscamL1*  
231 was relatively low in ipRGCs during postnatal development, but the closely related genes  
232 encoding the immunoglobulin superfamily (IgSF) adhesion molecules *Sidekick-1* and *Sidekick-2*  
233 were enriched in developing ipRGCs. *Unc5a* and *Unc5d* were significantly differentially expressed

234 both in early postnatal and adult ipRGCs. In contrast, expression of *Unc5b* and *Unc5c* in ipRGCs  
235 was low relative to that in cRGCs. As suggested previously, expression of the repulsive ligand  
236 *Sema6a* was significantly lower in ipRGCs than cRGCs during postnatal development (Matsuoka  
237 et al., 2011). However, its receptor *PlxnA4* was enriched in P5 ipRGCs. Another semaphorin,  
238 *Sema5a*, was also significantly enriched in developing ipRGCs. Other differentially expressed  
239 cell-adhesion molecules *Salm5* (*Lrfrn5*), *Clstn2*, *Thbs1*, *Lrrtm2*, *Pcdh19*, *Ptprm*, and *Lrrc4c* (*Ng1*)  
240 could play significant roles in the formation of ipRGC synapses (Burden-Gulley and Brady-Kalnay,  
241 1999; Lin et al., 2003; de Wit et al., 2009; Xu et al., 2010; Lipina et al., 2016; Pederick et al., 2016;  
242 Lin et al., 2018). The cell surface glycoprotein *Mdga1* was also differentially expressed in  
243 developing ipRGCs, and is known to influence the formation and maintenance of inhibitory  
244 synapses (Pettem et al., 2013).

245

## 246 6. **Tolerance to stress**

247 There is increasing evidence that ipRGCs are resistant to stress and able to survive under  
248 circumstances that are fatal for other retinal neurons (Li et al., 2008; de Sevilla Müller et al., 2014;  
249 Cui et al., 2015; Duan et al., 2015). The harsh dissociation and FACS processing has the potential  
250 of generating stress-induced gene expression changes (Figure 1 and 2, see methods). We  
251 attempted to identify potential survival molecular programs that are specific to ipRGCs compared  
252 to generic RGCs. The genes *Adcyap1* (PACAP), *Igf1*, and *Spp1* (*osteopontin*), all of which have  
253 previously described roles in promoting ipRGC survival (Atlasz et al., 2010; Duan et al., 2015)  
254 were differentially expressed in ipRGCs. We also identified a number of genes related to glial  
255 function differentially expressed in ipRGCs, including *Gldn*, *Cntn2*, *Lama4*, and *Astn2*, and *Thbs1*  
256 (Figure 2).

257

## 258 7. **Phototransduction**

259 Photoactivation of melanopsin photopigment typically triggers a phosphoinositide  
260 signaling cascade resembling that in rhabdomeric (invertebrate) photoreceptors, involving G  
261 proteins in the Gq family, phospholipase C, and canonical TRP channels. In ipRGCs, the  
262 phototransduction cascade typically signals through Gq-family proteins and phospholipase C beta  
263 4 (PLCB4) to open canonical TRP channels (*Trpc7* and *Trpc6*) (Graham et al., 2008; Xue et al.,  
264 2011; Hu et al., 2013; Emanuel and Do, 2015; Emanuel et al., 2017) (Figure 2—figure supplement  
265 4A). We determined that the genes in this signaling cascade (*Opn4*, *Trpc7*, *Trpc6*, *Plcb4*, and  
266 several Gq genes) were expressed at relatively high levels in all three ipRGC pools (i.e., selective-  
267 postnatal; selective-adult; or pan-subtype adult). Moreover, two key genes - *Opn4* and *Trpc7* -  
268 were more highly expressed in ipRGCs than in cRGCs in all three ipRGC pools. *Trpc6* was also  
269 significantly overexpressed in ipRGCs in younger animals, with a trend in this direction also in  
270 adult ipRGCs, but *Trpc7* was expressed at much higher levels than *Trpc6*. *Plcb4* appears  
271 essential for melanopsin phototransduction in some cells, and it was expressed at much higher  
272 levels than *Plcb1*, 2 or 3. However, except in young mice, it was not more highly expressed in  
273 ipRGCs than cRGCs.

274 Only recently has the precise identity of the  $G\alpha$  subunits combination in ipRGCs been  
275 identified as redundantly expressing and signaling through the *Gnaq*, *Gna11*, or *Gna14* subunits  
276 (Hughes et al., 2015). Our studies suggest a similar expression pattern, including a lack of *Gna15*  
277 expression (Figure 2—figure supplement 4A). Further, we determined that *Gna14* was  
278 differentially expressed in our P5 ipRGC samples, but it did not reach a statistical significant  
279 difference in adult *Opn4*-GFP ipRGCs. *Gnaq* appears to be among the highest expressing Gq/11  
280 subunits in our study, in contrast to the lack of *Gnaq* gene expression detected by Siegert and  
281 colleagues (2012). To date, the  $G\beta\gamma$  complex remains unknown. Our studies determined that the  
282 beta subunit *Gnb1* is by far the highest expressing, having a 15-fold higher expression than the  
283 other subunits *Gnb2*, *Gnb4*, or *Gnb5*; while *Gnb3* showed no expression in adult ipRGCs (Figure

284 2—figure supplement 4C). Additionally, we found that the gamma subunit Gng4 is differentially  
285 expressed in ipRGCs.

286 Also differentially expressed in ipRGCs were two factors with known roles in  
287 diacylglycerol (DAG) signaling, *Rasgrp1* and *Dgkg* (Figure 2—figure supplement 4B). Ras guanyl  
288 nucleotide-releasing protein 1 (*Rasgrp1*) is a guanine nucleotide exchange factor (GEF) that  
289 activates *Ras* by facilitating its GTP binding (Bivona et al., 2003). *Rasgrp1* binds DAG and  $Ca^{2+}$ ,  
290 both of which are elevated by melanopsin phototransduction. This provides a possible basis for  
291 intrinsic photoresponses of ipRGCs to modulate Ras signaling and thus genes governing cell  
292 growth, differentiation and survival. We will return to a more detailed consideration of *Rasgrp1*  
293 later in this report. Diacylglycerol kinase gamma (*Dgkg*) (Bivona et al., 2003; Shulga et al., 2011)  
294 converts DAG to phosphatidic acid, thus acting as a terminator of DAG signaling. Because DAG  
295 appears to be a key link between early steps in phototransduction and gating of the light-activated  
296 channels, *Dgkg* may regulate the kinetics of the photoresponse in ipRGCs. The protein products  
297 of the two overexpressed genes may interact. Diacylglycerol kinases are also known to bind to  
298 *Rasgrp* and modulate its activity (Topham and Prescott, 2001). Diacylglycerol and calcium are  
299 also known to activate the protein kinase C (PKC) family members *Prkcd* and *Prkcg* (Oancea and  
300 Meyer, 1998), which we determined to be differentially expressed in ipRGCs. Protein kinase C  
301 (PKC) activity has been suggested to be important for deactivating TRPC activity in the  
302 invertebrate photoreceptors and potentially also for the *Opn4* phototransduction cascade  
303 (Graham et al., 2008). Peirson and colleagues (2007) previously identified another PKC member,  
304 *Prkcz*, as being important for ipRGC-mediated photoentrainment of circadian rhythms (Peirson et  
305 al., 2007). However, *Prkcz* is only moderately expressed and similar to control samples in our  
306 study.

307 In other photoreceptors, RGS (Regulator of G protein signaling) proteins play a key role  
308 in terminating the photoresponse by accelerating the intrinsic GTPase activity of the cognate G-  
309 protein (e.g., transducin in rods). Two RGS genes were overexpressed in all three ipRGC pools:

310 *Rgs4* and *Rgs17*. At least one of these (*Rgs17*) regulates Gq signaling (Mao et al., 2004; Ji et al.,  
311 2011) (Figure 2—figure supplement 4B).

312 The arrestins also contribute to response termination by binding to phosphorylated opsin.  
313 ipRGCs exhibited strong expression of both beta arrestin genes (*Arrb1*, *Arrb2*) but low expression  
314 of rod (*Sag*) and cone (*Arr3*) arrestin genes. This is consistent with earlier evidence that beta  
315 arrestins rather than conventional retinal arrestins bind photoactivated melanopsin in ipRGCs  
316 (Cameron and Robinson, 2014). Still, these beta arrestin transcripts are both at similarly high  
317 levels in cRGCs as in ipRGCs, presumably because these arrestins regulate diverse GPCRs  
318 (Figure 2—figure supplement 4B).

319 Many of the genes involved in rod and cone phototransduction had low expression (scarce  
320 or no read alignment) and/or were present at much lower levels in ipRGCs than cRGCs. These  
321 include the genes for opsins, transducin alpha, and arrestin in rods (*Rho*, *Gnat1*, *Sag*) and cones  
322 (*Opn1mw*, *Opn1sw*, *Gnat2*, and *Arr3*; Figure 2—figure supplement 4C). Although *Cngb1* was  
323 differentially expressed in ipRGCs, the total reads aligning to the *Cngb1* locus were low and  
324 derived mainly from a limited region of the gene, and the obligatory alpha subunits were not  
325 detected, so this could be a false positive (Figure 2—figure supplement 4C).

326

### 327 **Genes differentially repressed in ipRGCs**

328 The lack of contamination by non-RGC retinal neurons in the postnatal day 5 (P5) samples  
329 allowed us to identify genes that were differentially repressed in ipRGCs compared to cRGCs in  
330 early postnatal development. Our data suggested that the transcription factor *Jun* (Jun Proto-  
331 Oncogene) and *Irx4* are differentially repressed in P5 ipRGCs samples (Figure 2—figure  
332 supplement 3). Other genes that were differentially repressed in the P5 ipRGC samples included  
333 *Satb1*, *Satb2*, and *Foxp2* showed, all of which are known to have restricted expression in the  
334 abundant F-RGC type that is likely included in the cRGC samples (Roussio et al., 2016). The  
335 *Pou4f1* (*Brn3a*) and *Pou4f3* (*Brn3c*) transcription factors were both differentially repressed in P5

336 ipRGCs, consistent with their known lack of expression in ipRGCs (Jain et al., 2012) (Figure 2—  
337 figure supplement 3). The transcriptional repressors *Bcl11b* (*CTIP2*), *Irx4*, and *Tbr1* were all found  
338 to be differentially repressed in ipRGC compared to cRGCs samples. Furthermore, the *Cdkn1c*  
339 (*p57KIP2*), a gene known to be transcriptionally repressed by *Bcl11b* (Topark-Ngarm et al., 2006),  
340 had relatively increased expression in ipRGCs (Figure 2—figure supplement 3).

341

### 342 **Expression differences between the *Opn4-GFP* and *Opn4-Cre/GFP* reporter systems**

343 To study gene expression differences across the different ipRGC subtypes, we compared  
344 the expression patterns of *Opn4-Cre/GFP* (labels all M1-M5 subtypes) and *Opn4-GFP* (labels  
345 only the M1-M3 subtypes) (Figure 2—figure supplement 1). In general, genes differentially  
346 expressed in ipRGCs identified in the two reporter systems were both supportive and cross-  
347 correlated. However, we identified 24 genes that were differentially expressed in the adult *Opn4-*  
348 *Cre/GFP* reporter but had low or no apparent expression in the *Opn4-GFP* reporter, suggesting  
349 selective expression in one or more of the M4-M6 ipRGC subtypes. The *Opn4-Cre/GFP* specific  
350 genes included *Anxa2*, *Gem*, *Sema3d*, *Rbp4*, and *Rxrg*. Recently, an *Rbp4* reporter (*Rbp4-Cre*)  
351 was demonstrated to mark amacrine cells coupled to ipRGCs, although there was an apparent  
352 lack of labeling in ipRGCs (Sabbah et al., 2017). The *Kcnk4/TRAAK*, another gene that was  
353 differentially expressed in the *Opn4-Cre/GFP* reporter, encodes a two-pore potassium channel  
354 subunit (Fink et al., 1998). Additionally, our data suggest that the *Kcns3* electrically silent voltage-  
355 gated potassium channel subunit has its expression restricted to the ipRGCs labeled by *Opn4-*  
356 *Cre/GFP*, but this difference did not reach statistical significance (FDR 0.13). However, close  
357 inspection of reads aligning to *Kcns3* using the integrated genome viewer (IGV) confirmed weak  
358 expression in ipRGCs and absent expression in cRGCs for *Opn4-Cre/GFP* samples (data not  
359 shown). Lastly, the neurexophilins *Nxph1* and *Nxph3* were differentially expressed in the *Opn4-*  
360 *GFP* and *Opn4-Cre/GFP* reporters, respectively (Figure 2—figure supplement 1). These proteins

361 are known to bind  $\alpha$ -neurexins in mice and have restricted expression patterns (Missler et al.,  
362 1998; Beglopoulos et al., 2005; Craig and Kang, 2007).

363

### 364 **Rasgrp1 is selectively expressed in ipRGCs**

365 We sought to test our transcript-level differential expression analysis at the protein level  
366 and to determine whether their expression is selective for particular adult ipRGC subtypes.  
367 Transcriptional profiling suggested that Rasgrp1 is expressed differentially, possibly even  
368 selectively, in ipRGCs. However, differential mRNA expression does not guarantee a  
369 correspondence with protein product (Koussounadis et al., 2015). Therefore, we used  
370 immunofluorescence against Rasgrp1 (Puente et al., 2000) to label the Rasgrp1 protein in whole-  
371 mount retinas from adult wild type mice. Rasgrp1-immunopositive somata were present in the  
372 ganglion cell layer (GCL) and in the inner nuclear layer (INL). The latter likely represent amacrine  
373 cells or displaced ganglion cells, judging by their close proximity to the inner plexiform layer (IPL)  
374 (Figure 3). Immunolabeling marked the cytoplasm as well as the somatic plasma membrane of  
375 these cells. Occasionally, particularly strongly Rasgrp1-labeled cells had some dendritic labeling.  
376 Rasgrp1 immunostaining was also observed in a subset of photoreceptors in the outer retina (data  
377 not shown).

378 To test whether the Rasgrp1-positive cells in the ganglion-cell layer were RGCs, we  
379 carried out double immunofluorescence for both Rasgrp1 (antibody m199) and the RNA-binding  
380 protein Rbpms, which selectively labels all and only RGCs (Rodriguez et al., 2014). About half of  
381 Rasgrp1-immunopositive cells in the GCL were RGCs, as determined by co-labeling for Rbpms  
382 (56%,  $n = 708$  across three retinas, Figure 3A,B). The remainder can be assumed to be displaced  
383 amacrine cells.

384 Most of these Rasgrp1-expressing RGCs were ipRGCs, as revealed by their  
385 immunoreactivity for melanopsin ( $95.9 \pm 1.1\%$ ,  $n = 412$ , Figure 3A,B). In contrast, only a fraction of

386 Opn4-immunopositive ipRGCs were Rasgrp1 immunopositive (34%,  $n = 1169$ ). Thus, Rasgrp1  
387 expression in the GCL is apparently restricted to a subpopulation of ipRGCs.

388 We next tested whether the immunolabeling of RGCs represented endogenous Rasgrp1  
389 protein expression. The antibody used in this study has been previously shown to specifically  
390 label Rasgrp1 protein expression in hippocampal neurons (Pierret et al., 2000). As a further test  
391 for the specificity of the antibody, we compared immunofluorescence labelling of whole mount  
392 retinas from normal and Rasgrp1-knockout mice generated by inserting *LacZ* and a *Neo* cassette  
393 into the Rasgrp1 gene to disrupt its expression (Dower et al., 2000). Our control experiments  
394 showed that the GCL and INL cellular immunolabeling is absent in the Rasgrp1 knockout (Figure  
395 3C). However, vasculature and photoreceptor cell labeling persisted in Rasgrp1-knockout mouse  
396 retinas, suggesting cross-reactivity of antibody with other proteins.

397

### 398 **Rasgrp1 expression is restricted to diverse ipRGC subtypes**

399 We next determined which of the established morphological subtypes of ipRGCs express  
400 Rasgrp1 into adulthood (Figure 3D). For this purpose, we used key characteristics such as relative  
401 Opn4 expression, soma size, and dendritic morphology (see Methods). In the GCL, the majority  
402 of M1/3 cells ( $71.6 \pm 3.9\%$ ,  $n = 300$  across three retinas) but only a fraction of M2 cells ( $23.4 \pm 5.4\%$ ,  
403  $n = 389$ ) and M5/6 cells ( $31.4 \pm 6.13\%$ ,  $n = 138$ ) expressed Rasgrp1 (Figure 3D). In the INL,  
404 displaced M1 cells express Rasgrp1 at a similar percentage as conventionally placed M1 cells  
405 ( $70.7 \pm 8.0\%$ ,  $n = 3$  retinas). We found no examples of Rasgrp1 immunoreactivity in M4 cells (0%,  
406  $n = 172$ , Figure 3D). Of the Rasgrp1-expressing ipRGCs, half were M1/3 cells ( $52.8 \pm 3.8\%$ ), nearly  
407 a quarter were M2 cells ( $21.1 \pm 2.7\%$ ) and a small percent ( $10.4 \pm 1.8\%$ ) were M5/6 cells ( $n = 396$   
408 Rasgrp1<sup>+</sup>/Opn4<sup>+</sup> cells across three retinas). Therefore, Rasgrp1 is selectively expressed in a  
409 diverse set of ipRGC subtypes.

410



## 411 **Spatial Distribution of Rasgrp1-expressing ipRGCs and amacrine cells**

412 Our data show neither a ventral-dorsal nor a naso-temporal density gradient of Rasgrp1-  
413 expressing M1-M3 ipRGC across the retina (Figure 3—figure supplement 1C). However, we did  
414 observe a minor ventral-dorsal gradient of Rasgrp1-expressing RGCs, with a higher density in  
415 the ventral (65%) compared to the dorsal (35%) retina (Figure 3—figure supplement 1E). As  
416 shown above, Rasgrp1-expressing RGCs are almost exclusively ipRGCs (96%).

417

## 418 **Tbx20 is expressed in a diverse subset of ipRGCs**

419 The T-box transcription factor Tbx20 was suggested from our gene expression analysis  
420 to be differentially expressed in ipRGCs. Immunofluorescence co-localization analysis of Tbx20  
421 and Opn4 expression confirmed its high expression in a subset of ipRGCs (Figure 4D). Tbx20  
422 was expressed in most M1 cells ( $82.6 \pm 1.8\%$ ,  $n=514$  across four retinas), but only in a minority of  
423 M2/3 cells ( $30.2 \pm 6.5\%$ ,  $n=1305$ ) and M5/6 cells ( $12.4 \pm 3.4\%$ ,  $n = 603$ ). Half of the displaced M1  
424 (dM1) cells expressed Tbx20 ( $46.0 \pm 7.1\%$ ,  $n = 153$ ). Strikingly, however, Tbx20 was not expressed  
425 in M4 cells ( $0\%$ ,  $n = 283$ ). These results demonstrate that Tbx20 is expressed in a diverse subset  
426 of ipRGCs.

427 Many Tbx20 cells were not detectably immunopositive for Opn4. Only 41% of Tbx20  
428 immunopositive were also Opn4-immunoreactive ( $18.5 \pm 2.6\%$  were M1 cells;  $16.0 \pm 2.0\%$  were  
429 M2/3 cells; and only  $3.6 \pm 0.9\%$  were M5/6 cells;  $n = 2184$  across four retinas; Figure 4—figure  
430 supplement 1). The remaining Tbx20-immunopositive cells were RGCs, as confirmed by Rbpms-  
431 immunoreactivity (data not shown). Additionally, Tbx20-immunopositive RGCs that were also  
432 Opn4-immunonegative were topographically enriched in the ventral retina, with most Tbx20-  
433 positive cells in the dorsal retina being accounted for by Opn4-immunoreactivity.

434

## 435 **Tbx20 expression in M5-M6 ipRGCs**

436 To investigate whether some or all of the Tbx20-immunopositive RGCs that were Opn4-  
437 immunonegative might be ipRGCs of the M5 and M6 subtypes that exhibit weak Opn4  
438 immunostaining, we examined the co-localization of Tbx20-immunopositive cells, Opn4-  
439 immunopositive cells, and all GFP-labeled cells in the *Opn4-Cre;Z/EG* mouse reporter, which  
440 among other ipRGCs, labels M5 and M6 cells. We observed examples of Tbx20-immunopositive  
441 cells that were GFP-positive (M1-M6 ipRGCs), but not Opn4-immunopositive (M1-M4),  
442 suggesting that Tbx20 is expressed in at least a subset of M5 or M6 ipRGCs (Figure 4—figure  
443 supplement 1A,B).

444 To test the implication that many Tbx20 cells were M5 or M6, we turned to Cdh3-GFP  
445 mice. Recently, our group determined that essentially all GFP+ RGCs in the Cdh3-GFP reporter  
446 mouse you used in your studies are either M6 cells (the great majority) or M5 cells (minority)  
447 (Quattrochi et al., 2018). We tested Tbx20 immunoreactivity in the context of Opn4  
448 immunofluorescence and *Cdh3-GFP* labeling (Figure 4B,C). For the purpose of this study, we  
449 focused on GFP cells in the GCL that are Opn4-immunonegative (to distinguish from Opn4-  
450 immunopositive M2 types). We found that at three weeks after birth, most *Cdh3-GFP* cells express  
451 the Tbx20 protein ( $82.1 \pm 4.3\%$ ,  $n = 439$  across four retinas, Figure 4C). Many, but not all, of the  
452 Opn4-immunonegative Tbx20-positive cells were GFP+ (27%,  $n=1277$  Tbx20+;Opn4- cells; 4  
453 retinas). The dorsal-ventral gradient of Tbx20-positive cells that are Opn4-immunonegative was  
454 broadly similar to the retinal labeling of the *Cdh3-GFP* reporter. A large portion of Tbx20-  
455 immunopositive cells remained unclassified ( $43.3 \pm 3.8\%$ ,  $n=2184$ ; Figure 4—figure supplement  
456 1D).

457 Further, we determined whether Tbx20 expression correlates with the related T-box  
458 transcription factor Tbr2, a gene previously described to be enriched in adult ipRGCs (Mao et al.,  
459 2014; Sweeney et al., 2014). All Tbx20-expressing cells were strongly Tbr2-immunopositive ( $n =$   
460 328; 4 regions distributed across a single adult *Opn4-Cre/GFP* retina; Figure 4—figure

461 supplement 1C). Therefore, whereas Tbr2 is expressed in a broad range of types that includes  
462 the entire ipRGC family, Tbx20 expression is confined to a diverse subset of ipRGC subtypes.

463

#### 464 **Molecular diversity of Rasgrp1 and Tbx20 expression in ipRGCs**

465 Our expression studies revealed that Rasgrp1 and Tbx20 have a strikingly similar pattern  
466 of expression among ipRGC subtypes. Both genes were expressed in the majority of M1 cells, a  
467 minority of M2 cells, and a small population of M5/6 cells, but not in M4 cells (Figures 4 and 5).  
468 To directly test for co-expression, we compared and contrasted the expression patterns of Tbx20-  
469 and Rasgrp1-immunoreactivity in the context of the M1-M4 subtypes revealed by Opn4-  
470 immunoreactivity (Figure 5). Rasgrp1 co-expression with Tbx20 was only observed in a fraction  
471 of M1/3 cells ( $26.0 \pm 1.8\%$ ;  $n = 241$  across two retinas; Figure 5). Further, M1 cells expressing  
472 either Rasgrp1 or Tbx20 alone accounted for roughly similar fractions of M1 cells ( $37.3 \pm 4.0\%$  and  
473  $31.1 \pm 3.5\%$ , respectively). Only a small fraction of M1 cells were immunonegative for both Rasgrp1  
474 and Tbx20 ( $5.3 \pm 0.7\%$ ). In contrast, half of M2 cells lacked Rasgrp1 and Tbx20 immunoreactivity  
475 ( $57.7 \pm 3.3\%$ ;  $n = 388$  across two retinas). Approximately a third of M2 cells expressed Tbx20  
476 ( $31.0 \pm 0.7\%$ ), while only  $11.3 \pm 5.1\%$  expressed Rasgrp1. We did not observe any example of an  
477 M2 cell expressing both Rasgrp1 and Tbx20.

478

#### 479 **Molecular diversity of SCN-projecting ipRGCs**

480 We further examined the Rasgrp1- and Tbx20-expressing ipRGC subtypes to seek  
481 intersectional expression patterns that would divide ipRGCs by their downstream visual pathways.  
482 Earlier studies showed that M1 cells could be subdivided based on their level of expression of  
483 Brn3b (Chen et al., 2011). We used quadruple immunolabeling to simultaneously test Brn3b  
484 expression with Rasgrp1- and Tbx20-immunoreactivity in the context of Opn4-immunolabeled  
485 ipRGCs (25 regions, three wild type retinas; Figure 5A,B). We determined that a minority of M1/3

486 cells express Brn3b ( $7.9\pm 6.0\%$ ,  $n=241$ ), which is similar to previous studies (Jain et al., 2012).  
487 The Brn3b<sup>+</sup> M1/3 cells expressed either Tbx20 or Rasgrp1 ( $91.0$  and  $9.0\pm 10.1\%$ , respectively;  
488  $n=30$ ) (Figure 5C).

489 Further, we determined that most M2 cells expressed Brn3b ( $90.8\pm 6.9$ ,  $n=168$ ). In contrast  
490 to M1/3 ipRGCs, the majority of Brn3b<sup>+</sup> M2 ipRGCs did not express either Rasgrp1 or Tbx20  
491 ( $67.4.6\pm 13.8$ ,  $n=222$ ). Most M2 cells expressing Tbx20 were also Brn3b immunopositive  
492 ( $84.5\pm 25.1$ ,  $n=118$ ). The small subset of M2 cells that express Rasgrp1 could be further divided  
493 by Brn3b presence or absence ( $5.0\pm 6.0\%$  and  $4.5\pm 1.4\%$ , respectively;  $n=168$ ). Generally, we  
494 found no cells co-expressing all three genes ( $n=729$ ).

495 Our immunostaining study in the retina suggested that SCN-projecting M1 cells (Brn3b-  
496 negative) might represent molecularly diverse cell populations (Figure 5C). We correlated gene  
497 expression of Rasgrp1 and Tbx20 in the retina with retrograde labeling from the SCN (Figure 6A).  
498 We injected rhodamine-conjugated retrobeads in the SCN, followed by immunofluorescence  
499 labeling for Opn4, Rasgrp1, and Tbx20 (Figure 6A-C). All injection sites clearly involved the SCN,  
500 as revealed by DAPI labeling, but did not spread to the optic chiasm or tract (Figure 6B).  
501 Quantitative co-expression analysis (18 confocal images collected across the contralateral and  
502 ipsilateral retinas) revealed that nearly all retrolabeled cells were Opn4-immunopositive (95%).  
503 These cells exhibited variable patterns of staining for the other proteins. Most cells expressed  
504 both Rasgrp1 and Tbx20 (76%), but equal minorities expressed either Rasgrp1 (12%) or Tbx20  
505 (12%, Figure 6D). This expression pattern was consistent across the ipsi- and contralateral retina  
506 (Figure 6D), as suggested by a bilateral input to the SCN (Hattar et al., 2006; Fernandez et al.,  
507 2016). Therefore, we show that SCN-projecting ipRGCs have a complex pattern of Rasgrp1 and  
508 Tbx20 gene expression. Together, these results provide evidence for previously unrecognized  
509 molecular diversity in adult ipRGCs.

510

511 **Discussion (2657 words)**

512 Prior efforts to assess the distinctive genetic composition of ipRGCs have been complicated by  
513 their rarity among diverse retinal cell types and the inherent difficulties of maintaining viability of  
514 dissociated mature neurons (Lobo et al., 2006). Our approach was first to isolate RGCs by  
515 immunoaffinity, then to further purify ipRGCs from these based on genetic labeling and FACS,  
516 and to finally to compare the transcriptional profiles of the purified ipRGCs to those of the residual  
517 cell pool, consisting mainly of conventional RGCs. The relative purity of our ipRGC sample is  
518 supported by enrichment for transcripts of genes known to be differentially expressed in ipRGCs  
519 and the low levels of transcripts selectively expressed in potentially contaminating populations,  
520 including the abundant rod photoreceptors. Our isolation method and differential expression  
521 analysis allowed us to identify more than 75 differentially expressed genes in ipRGCs relative to  
522 conventional RGCs.

523

524 **Genes differentially expressed in adult ipRGCs**

525 There is limited knowledge of specific gene expression in ipRGCs generally and within  
526 particular ipRGC subtypes, especially non-M1 ipRGCs. Many diverse genes appeared more  
527 highly expressed in ipRGCs than in conventional RGCs. We confirmed differential protein  
528 expression in ipRGCs immunohistochemically for two of these genes: Tbx20, a transcription factor  
529 implicated in visual development; and Rasgrp1, a G-protein exchange factor that may interact  
530 with the melanopsin phototransduction cascade. However, only a subset of ipRGCs appeared to  
531 express detectable levels of these proteins, and such variable expression was apparent even  
532 among ipRGCs of the same subtype. Some ipRGCs expressed both proteins, but many did not.  
533 This diversity even extended to the M1 cells projecting to the SCN, which had been thought to  
534 share the distinctive molecular feature of little or no expression of the transcription factor Brn3b.  
535 These novel markers of molecularly distinctive ipRGC varieties open the way for cell-type-specific  
536 manipulations through intersectional strategies.

537

### 538 **What type(s) of adult ipRGCs express Rasgrp1?**

539           Rasgrp1 expression has previously been detected in the hippocampus, striatum and  
540 olfactory regions of the brain (Ebinu et al., 1998; Toki et al., 2001), but our study appears to be  
541 the first to explore Rasgrp1 expression in the eye. Rasgrp1-like immunoreactivity marked a  
542 diverse subpopulation of ipRGC subtypes, including the M1-M3 ipRGC subtypes but not the M4-  
543 type. Either M5 or M6 ipRGCs, or both, also appear likely to express Rasgrp1, because some  
544 Rasgrp1 immunoreactive cells had weak Opn4-immunoreactivity without the characteristic  
545 dendritic labeling of M1-M3 ipRGCs and with somas too small to be M4 cells (Ecker et al., 2010;  
546 Quattrochi et al., 2018; Stabio et al., 2018).

547

### 548 **What is the function of Rasgrp1 in adult ipRGCs?**

549           The function of Rasgrp1 in ipRGCs is unknown, but it could interact with the melanopsin  
550 phototransduction cascade. The direct photoresponse of ipRGCs appears to increase levels of  
551 both DAG and calcium. Both of these signaling molecules bind to and activate Rasgrp1, and  
552 trigger its translocation to the Golgi apparatus (Bivona et al., 2003; Graham et al., 2008; Zhang  
553 et al., 2010). However, ipRGC phototransduction Rasgrp1 signaling does not appear to be  
554 essential for ipRGC phototransduction because more than a quarter of M1 ipRGCs and the great  
555 majority of M2 cells are immunonegative for Rasgrp1. Even in ipRGCs, Rasgrp1 may be activated  
556 by DAG and calcium signals unrelated to Opn4 phototransduction, and such signals are  
557 presumably also responsible for modulating Rasgrp1 in cells (such as certain amacrine cells)  
558 which express Rasgrp1 but not melanopsin.

559           Rasgrp1 has the potential to affect any number of neuronal signaling pathways. Ras  
560 signaling pathways are enormously complex and the cross talk between pathways makes it even  
561 harder to identify specific effects. One basic mechanism for specificity in Ras signaling is the  
562 distinct subcellular targeting of downstream components of the signaling pathway. In

563 lymphocytes, localized Ras signaling of Rasgrp1 occurs preferentially on the Golgi apparatus,  
564 which is a rare form of compartmentalized Ras signaling (Bivona et al., 2003; Zhang et al., 2010).  
565 The Golgi apparatus in neurons provides the posttranslational protein modifications required for  
566 organizing protein and organelle trafficking throughout the cell. Rasgrp1 could play a crucial role  
567 in orchestrating a specific set of post-translational modifications at the Golgi.

568 An important survival mechanism in M1 ipRGCs is the maintenance of mTOR expression  
569 by melanopsin phototransduction (Duan et al., 2015; Li et al., 2016). The DAG-activated Rasgrp1-  
570 Ras-Mek1/2-Erk1/2 pathway contributes to mTOR activation in thymocytes (Gorentla et al., 2011).  
571 The percentage of M1 cells expressing Rasgrp1 (72%) in this study is similar to the percentage  
572 of M1 cells that survive optic nerve crush (~70%, Li et al., 2016). It would be interesting to test  
573 whether Rasgrp1 is required for the maintained mTOR levels in these surviving M1 ipRGCs.  
574 Recent studies have also clarified different mechanisms responsible for M1 survival and the  
575 regeneration potential of alpha-RGCs such as M4 ipRGCs (Duan et al., 2015; Li et al., 2016).  
576 Despite surviving well, M1 ipRGCs were not capable of regenerate their axons (Li et al., 2016).  
577 In contrast, alpha-RGCs had a unique capability to regenerate their axons that was promoted by  
578 their high levels of mTOR expression as well as osteopontin/Spp1 expression coupled with the  
579 growth factor IGF-1(Duan et al., 2015). Whereas M1 ipRGCs were found to maintain mTOR  
580 expression after axon injury, M4 ipRGCs and other alpha RGC types were demonstrated to have  
581 diminished mTOR expression levels (Li et al., 2016). The absence of detectable Rasgrp1  
582 expression in M4 ipRGCs may help to account for their failure to maintain mTOR expression after  
583 injury.

584

### 585 **Central brain targets of Rasgrp1-expressing ipRGCs**

586 At the circuit level, Rasgrp1 is not anticipated to be an essential regulator of circadian  
587 photoentrainment. The majority of M1 ipRGCs are known to provide the primary retinal input to  
588 the SCN, while a subset of M1 ipRGCs send input to the OPN to regulate the pupillary reflex. Our

589 studies found that *Rasgrp1* was expressed in the majority of M1 ipRGCs, which suggested to us  
590 that it might correlate directly and completely with the SCN-projecting M1s. However, retrograde  
591 tracing experiments from the SCN revealed that some SCN-projecting M1 cells were *Rasgrp1*-  
592 immunonegative. Accumulating research suggests that the SCN is more compartmentalized than  
593 previously recognized (Bedont and Blackshaw, 2015). The question of whether *Rasgrp1* is  
594 expressed in a subset of M1 ipRGCs that targets a specific compartment of the SCN remains to  
595 be determined.

596 We find *Rasgrp1* to be expressed not only in SCN-projecting M1 ipRGCs, but also in other  
597 ipRGC subtypes, especially M2 cells and apparently M5 and/or M6 cells. Collectively, these types  
598 project to various non-image-forming visual centers, including the olivary pretectal nucleus,  
599 intergeniculate leaflet, and dorsal lateral geniculate nucleus (Quattrochi et al., 2018; Stabio et al.,  
600 2018).

601

## 602 **Tbx20 is expressed in a diverse set of ipRGC subtypes**

603 The T-box transcription factor *Tbx20* exhibited enriched expression relative to  
604 conventional RGCs in postnatal and adult retinas. Double immunolabeling revealed that many  
605 ganglion cells that expressed this protein also expressed melanopsin. As was true for *Rasgrp1*,  
606 *Tbx20* was determined to be expressed in most M1 ipRGCs (75%), a substantial minority of M2  
607 cells (40%) and an additional population of RGCs whose identity was not immediately obvious.  
608 We decided to then compare *Tbx20* against other known molecular patterns in ipRGCs. Whereas  
609 most RGCs follow a *Brn3b*-dependent developmental program, the M1 ipRGCs that project to the  
610 SCN do not express *Brn3b* while OPN-projecting M1 ipRGCs express *Brn3b*. We found that  
611 *Brn3b*-expressing M1 cells are also *Tbx20*-immunopositive. The *Brn3b*-negative M1 cells are split  
612 between cells that express *Tbx20* and those that do not. This finding suggests that ipRGCs are  
613 more molecularly diverse than originally anticipated: *Tbx20* is expressed in ipRGCs with differing  
614 brain targets, *Tbx20* is expressed across multiple morphologically defined subtypes, and *Tbx20*



615 is not expressed in all of any one type. The exploration of Tbx20 coexpression with Rasgrp1  
616 revealed a complex coexpression pattern among M1-M3 ipRGCs.

617

### 618 **What is the function of Tbx20 in adult ipRGCs?**

619 Tbx20 has well-established roles in embryonic development and is continuously required  
620 in mature neurons and other cell types to maintain their identities and functional properties during  
621 adulthood (Naiche et al., 2005). Tbx20 functions as a repressor in early embryonic ocular  
622 development (Carson et al., 2000; Pocock et al., 2008) and is required for the expansion of the  
623 small pool of precursor cells in the optic vesicle (Carson et al., 2004). However, little is known  
624 about the function of Tbx20 in the adult retina.

625 Tbx20 can function as a transcriptional activator in parallel with its repressor activity, with  
626 these two roles impinging on distinct biological processes (Sakabe et al., 2012). In addition to its  
627 key developmental roles, Tbx20 appears vital for maintaining the structure and function of cardiac  
628 muscle cells in the adult mouse heart (Stennard et al., 2003; Shen et al., 2011). In adult  
629 cardiomyocytes, Tbx20 is responsible for directly activating genes critical for normal adult cardiac  
630 function such as those required for ion transport and heart contraction (Shen et al., 2011; Sakabe  
631 et al., 2012). In contrast, genes directly repressed by Tbx20 have known roles in non-heart  
632 developmental programs, cell cycle, proliferation, and immune response (Sakabe et al., 2012).  
633 The transcriptional effects of Tbx20 shift during cardiac development, from early mediation of  
634 proliferation of cardiac progenitors, to implementation of an anti-proliferative program in the adult  
635 heart (Cai et al., 2005; Takeuchi et al., 2005). Therefore, Tbx20 cooperates with distinct cohorts  
636 of transcription factors to either promote or repress distinct molecular programs in a context-  
637 dependent manner (Sakabe et al., 2012). Similarly, binary cell fate specification in the retina is  
638 driven by complex genetic programs that require the simultaneous activation and repression of  
639 genes by transcription factors. Tbx20 may prove to have a similar reversal in its transcriptional  
640 activity in the retina when transitioning from broad embryonic development program to regulating

641 adult neuron identity of a subset of ipRGCs. Further, Tbr2 is another Tbox family member that is  
642 known to have a critical role in the development of retinal ganglion cells (Mao et al., 2008), which  
643 later becomes essential to a restricted set of ipRGCs that participate in NIF visual circuits (Mao  
644 et al., 2014; Sweeney et al., 2014). Our studies determined that Tbx20 and Tbr2 are coexpressed  
645 in adult ipRGCs. They may work cooperatively to specify ipRGC subtype identity by regulating  
646 cell-specific transcriptional programs and repressing alternate fates.

647

### 648 **Characterization of ipRGC subtypes**

649 Retinal cell types are generally classified using a combination of morphology, gene  
650 expression, mosaic organization, light responses and synaptic connectivity (Sanes and Masland,  
651 2015). By these criteria, intrinsically photosensitive RGCs comprise at least 6 distinct cell types  
652 (Figure 7). Though all express melanopsin, they differ from one another in the strength of the  
653 intrinsic response, their morphology, pattern of light responses, and projections to the brain.  
654 However, the further subdivision may be in order. The M1 type appears subdivisible into at least  
655 two subtypes, one expressing the transcription factor Brn3b and innervating the OPN and  
656 geniculate complex, while the other lacks Brn3b expression and innervates the SCN (Chen et al.,  
657 2011). Our study shows further diversity in the M1 and M2 types based on the expression of  
658 Rasgrp1 and Tbx20. For example, we find molecular diversity among in the SCN-projecting  
659 ipRGC subtypes (Figure 7). It is unclear to us whether this should be used to propose a further  
660 formal subdivision of M1 and M2 cells. For example, the expression of these proteins could  
661 fluctuate over time in individual cells and be uncorrelated across cells of the same type. One  
662 would like to know that these patterns of expression are stable over time and correlated with other  
663 cell features before proposing such further subdivision. The extensive overlap among dendritic  
664 fields of M1 (and of M2) cells (Berson et al., 2010) means that either type could be subdivided  
665 into two or perhaps three subtypes while still maintaining full retinal coverage (i.e., tiling), but it  
666 seems likely that we will either have to accept that there is substantial molecular diversity with

667 single types (as there is substantial functional diversity among M1 cells (Emanuel et al., 2017))  
668 or that the dogma of complete retinal tiling by single types must be abandoned.

669 In addition to Tbx20 expression in a subset of SCN-projecting M1s, Tbx20 may also  
670 regulate the molecular program of ipRGCs projecting to the OPN and control the pupillary light  
671 reflex. The Brn3b-expressing M1 ipRGCs, a subset of M2 ipRGCs and *Cdh3-GFP* labeled M6  
672 ipRGCs are all known to project to the OPN, and all express Tbx20. However, this is not a direct  
673 association and further retrograde or Tbx20 conditional knockout studies are required, especially  
674 to determine the function of Tbx20-expressing M2s.

675

### 676 **Comparison with other ipRGC gene expression profiles**

677 Siegert and colleagues (2012) surveyed gene expression in many different sets of mouse  
678 retinal neurons, using specific mouse reporter strains (including the *Opn4-Cre* reporter system  
679 for ipRGCs), FACS isolation of labeled cells, and microarray analysis. Many of the genes they  
680 found strongly expressed in ipRGCs were also among the genes we found differentially expressed  
681 in ipRGCs. However, dozens of additional genes differentially expressed in ipRGCs emerged  
682 from our analysis that were not detected in theirs (Siegert et al., 2012). Discrepancies between  
683 their findings and ours may stem from technical factors such as differing degrees of contamination  
684 of the starting material with rod photoreceptor transcripts, the use of internal control cell  
685 populations for relative gene expression comparison in our study but not theirs, and differences  
686 between microarray and RNA-sequencing methodologies.

687 Another recent study used single-cell transcriptomic analysis of the mouse retina and  
688 were able to identify ipRGCs from their cell suspensions (Macosko et al., 2015). Single cell  
689 technology is ideal, in principle, for the precise identification of an individual neuron's molecular  
690 identity despite the extreme heterogeneity of the nervous system. Macosko et al., 2015 could  
691 definitively distinguish the main broad class of RGCs, but they required *post hoc* supervised  
692 analysis to distinguish a limited number of genes attributed to *Opn4*-positive cell clusters. They

693 identified nine genes with a two-fold increase in expression compared to Opn4-negative cells.  
694 Three genes (Tbr2, Igf1, and Tbx20) were also found to be enriched in our ipRGC samples. In  
695 contrast, Tbx20 did not reach above threshold for Siegert et al., (2012), but it is among the highest  
696 expressing ipRGC-enriched genes in our study. Single-cell gene expression profiling methods  
697 such as Drop-Seq hold great promise and will certainly continue to be pursued more in future  
698 studies of neuron subtype gene expression. Recently, single-cell studies of pre-enriched bipolar  
699 cells were able to distinguish molecular markers for all previously recognized bipolar cell types  
700 (Shekhar et al., 2016). Similarly, ipRGCs subtype-specific gene expression may become  
701 deciphered in the future using single-cell analysis that incorporates a pre-enrichment step for  
702 ganglion cells.

703

#### 704 **Conclusion**

705 In conclusion, our results demonstrate a method to purify ipRGCs and identify an  
706 extensive list of more than 75 genes that are differentially expressed compared to generic RGCs.  
707 Of course, our identified differentially expressed genes in ipRGCs should not be considered a  
708 complete account of all genes relevant to ipRGC function. Instead, we hope that it will provide a  
709 beneficial resource that will generate hypothesis that lead to key insights into ipRGC function in  
710 non-image forming vision. The more than 75 genes suggested to be differentially expressed in  
711 ipRGCs will be useful for the identification of marker genes for ipRGC subtypes, comparison of  
712 gene expression across types, understanding the intracellular gene networks underlying ipRGC  
713 phenotypes, and the testing for conservation of ipRGC molecular programs across mammalian  
714 species.

715 We are encouraged that our gene expression profiling data of ipRGCs lead us to the  
716 identification of Tbx20 and Rasgrp1 as novel, selectively expressed genes in ipRGCs. These  
717 results serve as a good proof of principal for the validity of our gene expression profiling results.  
718 In addition, the stable, specific expression in adult ipRGCs suggests that the differential gene

719 expression of *Rasgrp1* and *Tbx20* were not simply due to transient, stress-induced molecular  
720 program resulting from the harsh processing steps prior to sequencing. We determined that *Tbx20*  
721 and *Rasgrp1* are expressed across ipRGCs that belong to multiple morphological types, have  
722 diverse molecular expression, differing physiology, and are involved with multiple visual brain  
723 circuits.

724

## 725 **Methods**

### 726 *Animals:*

727 All experiments were conducted in accordance with NIH guidelines under protocols approved by  
728 the Brown University (Providence, RI) Animal Care and Use Committee. Both male and female  
729 adult mice (P30 to P90) were used unless otherwise stated. *Opn4<sup>cre/cre</sup>* mice (Ecker et al. 2010)  
730 crossed with floxed-stop reporter mice: “Z/EG” (*Jax#003920*); the offspring express GFP in *cre*-  
731 expressing cells (M1-M6), as described by Ecker et al., 2010. *Opn4-GFP(ND100Gsat)* is a BAC  
732 transgenic originated from the GENSAT project at Rockefeller University. *Rasgrp1-KO*  
733 (*Rasgrp1<sup>tm1Jstn</sup>*, Dower et al., 2000) was initially provided generously by Robert Barrington, U. of  
734 Alabama for initial testing. A colony was created inhouse from stock at Jackson labs (*Jax 022353*).  
735 *Rasgrp1-Cre*(PO1 founder line) was rederived from Jackson Labs (#34811-UCD). *Cdh3-GFP*  
736 reporter is a BAC transgenic originally generated by the Gensat project (MMRRC,  
737 BK102Gsat/MMNC) and has been used previously (Quattrochi et al., 2018). This mouse line has  
738 been backcrossed in wild type background for at least 10 generations. *Cdh3-GFP* mice were three  
739 weeks old or younger unless otherwise stated.

740

### 741 *Gene expression analysis of purified mouse ipRGCs*

742 For our transcriptomics studies, we used two ipRGC reporters available in the lab to  
743 identify selective gene expression in ipRGCs compared to RGCs as a whole: 1) BAC transgenic  
744 *Opn4-EGFP* Gensat mice from MMRRC (#033064-UCD) and 2) knock-in *Opn4-Cre* mice

745 (obtained from S. Hattar; Ecker et al., 2010) with Cre-dependent GFP reporter (Z/EG obtained  
746 from Jackson labs; (Novak et al., 2000). The *Opn4-GFP* mice were maintained as heterozygotes  
747 on *C57/BL6* background while *Opn4<sup>Cre/+</sup>;Z/EG* mice were generated by breeding homozygous  
748 *Opn4-Cre* mice with heterozygous *Z/EG* mice and maintained on mixed background. Although  
749 *Opn4-GFP* reporter labeling in ipRGCs has not been reported previously, a similar BAC  
750 transgenic strategy has been demonstrated to label M1-M3 ipRGCs (Schmidt et al., 2008). We  
751 tested the correlation of the *Opn4-GFP* reporter expression and endogenous melanopsin in  
752 RGCs. We used anti-melanopsin immunoreactivity label M1-M3 ipRGCs (Berson et al., 2010) and  
753 anti-EGFP antibodies in a whole-mount retina from an adult *Opn4-EGFP* mouse. Importantly, all  
754 *Opn4-GFP<sup>+</sup>* cells were Opn4-immunopositive (n=60 GFP<sup>+</sup> cells across seven regions of one  
755 retina, Figure 8A). Unexpectedly, more than half of the Opn4-immunopositive M1-M3 ipRGCs  
756 were not labeled by the reporter (55%, n=133). Therefore, the coexpression of EGFP expression  
757 by the *Opn4-GFP* reporter is strongly correlated with M1-M3 ipRGCs, but only accounts for about  
758 half of the population. The other reporter system used in this study, *Opn4<sup>Cre/+</sup> ; Z/EG* mice, has  
759 been previously demonstrated to label with EGFP all six known morphological types of ipRGCs),  
760 named M1–M6 (Ecker et al., 2010; Quattrochi et al., 2018; Stabio et al., 2018). However, Opn4-  
761 immunofluorescence studies of four regions across an *Opn4-Cre/GFP* retina revealed that more  
762 than one-fourth of M1, displaced M1, and M2 cells lacked discernable GFP-labeling (28%, n=81;  
763 27%, n=15; 33%, n=132, respectively) (Figure 8C). There were many additional GFP<sup>+</sup> cells that  
764 were Opn4-immunonegative, with large soma cells being designated as M4 ipRGCs (54%, n=67  
765 M4 cells). The remaining identified M4 cells had somas with weak, but present, Opn4-  
766 immunoreactivity and were only partially accounted for by GFP-labeling (27% Opn4<sup>+</sup>;GFP<sup>neg.</sup>,  
767 n=67 M4 cells). Additionally, small soma GFP<sup>+</sup> cells with absent Opn4-immunoreactivity were  
768 designated as M5/6 cells, since the lack of dendritic labeling made it impossible to distinguish  
769 between the M5 and M6 types (72%, n=202 M5/6 cells). We observed small cell bodies with  
770 weakly Opn4-immunolabeling that did not extend to the dendrites, which were also designated as

771 M5/6 types (28%).

772 Two ages were chosen for retina tissue collection for purification of ipRGC neurons:  
773 Postnatal day 5 (+/- 1day) and young adult (P30 +/- 3 days). Three or more biological replicates  
774 were used for each dataset (three for postnatal day 4-6 (P4-6) Gensat *Opn4::GFP*, six replicates  
775 for Gensat *Opn4::GFP*, four replicates for *Opn4::Cre/GFP* reporter). Each adult replicate required  
776 the pooled retinas from 15-20 transgenic mice to acquire suitable numbers of cells for the  
777 transcriptomics. These steps are outlined in much more depth and detail in the following sections.

778 The choice of transcriptomics preparation strategies and final readout of processed  
779 samples are interrelated and subject to a number of technical concerns vital to the success of  
780 transcriptomics analysis. Seven steps in the development and completion of the cell type-specific  
781 transcriptomics procedure of cells isolated from early postnatal and adult mouse retinas (Figure  
782 1). **First**, dissociation of retinal tissue to a cell suspension; **Second**, purification of RGCs; **Third**,  
783 FACS analysis and sorting; **Fourth**, extraction of RNA; **Fifth**, cDNA amplification because the  
784 resulting RNA is typically low in abundance; **Sixth**, shear cDNA into sequenceable fragments that  
785 are then sequenced with Illumina deep-sequencing; and **Finally**, the raw reads must be analyzed  
786 to identify differential expression of genes in ipRGCs.

787

#### 788 *Retina dissociation*

789 The intertwined nature and tight cell–cell adhesions of neural cells make it difficult to  
790 separate cells without causing cellular damage and activating stress or cell death pathways.  
791 Therefore, vigorous dissociation of tissues can lead to activation of stress or cell death pathways  
792 and distort the resulting expression profile. However, poor dissociation can lead to a severe  
793 decrease in isolated cells and make downstream expression studies an impossibility. As a first  
794 step, we dissected retinal tissue, which we then digested in a protease solution to loosen and  
795 disrupt the intertwined neural cells into single cell suspensions for subsequent cell-type isolation.  
796 The essential components for proper dissociation included: the proteolytic enzyme papain L-

797 cysteine to promote enzymatic activity, DNase for destroying the extremely sticky free DNA  
798 strands released by damaged cells, and an absence of calcium from solutions to promote  
799 disruption of cell-cell adhesions (Barres et al., 1988). We further optimized cell viability and  
800 recovery by replacing dPBS with HibernateA and including B27 throughout the cell-isolation  
801 procedure (Brewer et al., 1993; Brewer, 1997; Brewer and Torricelli, 2007). The use of survival-  
802 promoting media such as Hibernate-A and supplements such as B27 was particularly relevant for  
803 adult neural dissociation since adult neurons have been demonstrated to be especially prone to  
804 cell death (Eide et al., 2005; Brewer and Torricelli, 2007). We incubated the dissected retinas in  
805 pre-activated protease solution and completed the cell dissociation by triturating the cells with a  
806 1mL pipette tip.

807

#### 808 *RGC Pre-Enrichment*

809 Pre-enrichment of ganglion cells prior to isolation of ipRGCs is necessary due to their  
810 extraordinary rarity in the retina. Ganglion cells only make up 1% of mouse retinal cells and only  
811 1-5% of ganglion cells are ipRGCs (0.01-0.05% of retina cells) (Hattar et al., 2002; Ecker et al.,  
812 2010; Berson et al., 2010). In contrast, the classic photoreceptors rods and cones account for 75-  
813 80% of all mouse retinal cells (Jeon et al., 1998). Therefore, we pre-enriched for ganglion cells  
814 prior to positively selecting fluorescently labeled ipRGCs using fluorescence activated cell sorting.  
815 We incorporated an immunopanning system that has proven effective at isolating a homogeneous  
816 population of RGCs (Barres et al., 1988; Cahoy et al., 2008). Immunopanning takes advantage  
817 of the cell surface protein Thy1 which is shared among retinal ganglion cells (Barres et al., 1988).  
818 The classic immunopanning process uses antibodies raised against Thy1 to select the RGCs  
819 from the heterogeneous retinal cell suspension. We improved upon viability and reproducibility of  
820 the immunopanning procedure by adapting it to use a magnetic-activated cell sorting procedure  
821 (MACS, Miltenyi Biotec), eliminating the need for using harsh lysis treatment (data not shown).  
822 We incubated the dissociated retinal cell solution with Thy1.2-conjugated magnetic nanoparticles



823 which are retained in a magnetized column and the isolated RGCs can then be acquired (Haeryfar  
824 and Hoskin, 2004). In preparation for FACS, the DNA intercalating dye, 7-AAD, was added to the  
825 solution to discriminate dying cells that consequently had compromised cell membranes.

826

### 827 *Fluorescence-Activated Cell Sorting (FACS)*

828 We used a FACS Aria (BD Biosciences) electrostatic sorter to isolate a homogeneous  
829 GFP-labeled cell population from the dissociated RGC-enriched cell suspension of the transgenic  
830 melanopsin reporter mice (Figure 1). FACS has been successfully used previously to profile gene  
831 expression in cell subtypes of the nervous system (Lobo et al., 2006; Cahoy et al., 2008; Siegert  
832 et al., 2012). Live cell gating was achieved by excluding 7-AAD labeled cells (high fluorescence  
833 signal in far red emission) (Figure 9). Fluorescently labeled ipRGCs were positively selected from  
834 the solution of enriched ganglion cells by their relatively high level of GFP fluorescence (FITC  
835 gating). In parallel, cells with relatively low GFP-fluorescence (low FITC) were also isolated and  
836 designated as a “generic RGC” control population for direct comparison with correlated ipRGC  
837 samples. The parallel isolation of generic RGCs was designed as an internal negative control for  
838 comparison with isolated ipRGCs. Accordingly, the generic RGC populations were treated with  
839 the same reagents, cytometer settings, centrifugation forces, and temperatures throughout the  
840 procedure. This is especially important for isolating adult RGC populations, since they are  
841 particularly susceptible to the stresses of FACS sorting (Lobo et al., 2006; Cahoy et al., 2008;  
842 Heiman et al., 2008). The large amount of small cellular debris generated during the dissociation  
843 process made it a challenge to keep the number of collected generic RGCs consistent with the  
844 rare ipRGCs (Figure 9). Cellular debris registers as being essentially non-fluorescent, is smaller  
845 and less complex than the generic RGC population that is of the same relative size and complexity  
846 as the isolated GFP-positive cells. Therefore, we limited cell debris by acquiring the ipRGC  
847 (GFP+) and generic RGC (GFP-negative) populations with the same relative cell complexity

848 (indicator of cell health) and cell size selection to exclude the relatively small cellular debris or  
849 doublets.

850

#### 851 *RNA Extraction*

852 The small volumes allowed by the electrostatic FACSAria sorter allowed us to lyse sorted  
853 cells directly into Qiagen RLT buffer and directly proceed to RNA extraction using Minelute  
854 columns (Qiagen). The enriched RNA was treated on-column with DNase to remove any residual  
855 genomic DNA from the sample. RNA-processing was done in an enclosed RNase-free  
856 environment to limit degradation of RNA throughout the extraction process. Additionally, RNA  
857 integrity was analyzed using the Agilent 2100 Bioanalyzer and the PicoChip, which is able to  
858 qualitatively test the low RNA recovery samples (Figure 10A). Initially, we proceeded immediately  
859 with cDNA processing after RNA extraction. However, freezing at -80 degrees did not seem to  
860 effect RNA integrity since the frozen RNA samples still received RIN score of 9.0 or greater  
861 (Figure 10A). Therefore, most of the cDNA libraries were prepared after storage of extracted RNA  
862 at -80 degrees Celsius.

863

#### 864 *cDNA Preparation*

865 RNA-seq transcriptome analysis requires large amounts of RNA material using TruSeq,  
866 ranging on the order of 100-1000ng of total RNA. However, our improved method for isolating  
867 ipRGCs was able to isolate 12,000 GFP+ ipRGCs from nine postnatal day 5 (P5) transgenic  
868 reporter mice. This was only expected to provide about 12ng of extracted total RNA by qualitative  
869 estimates considering that a single cell holds 5-10pg of total RNA. Further, twice as many adult  
870 mice of the same genotype were required to provide only 1,000 cells due the the relative fragility  
871 of adult retinal ganglion cells described above. Therefore, we decided that some form of  
872 amplification was necessary to study the molecular programs used by adult ipRGCs. The Nugen  
873 Ovation RNA amplification system was successfully used in microarray studies with as little as

874 500pg of total RNA input (Caretto et al., 2008; Clément-Ziza et al., 2009; Morse et al., 2010)  
875 (Figure 10B). Sequencing analysis using the Ovation system has previously been reported to  
876 generate cDNA containing negligible rRNA reads (<4%), while providing a representative  
877 transcriptome with sufficient biological replicates(Tariq et al., 2011).

878

### 879 *RNA-seq library preparation*

880 We determined that the Truseq system was the necessary platform for my cDNA samples  
881 to produce the 10nM sequencing library concentration required at the on-site Genomics Core  
882 facility in preparation for 50bp single-end Illumina sequencing. Before preparing the library, we  
883 first sheared cDNA to the appropriate size, (200-300bp median) using the Covaris system (Figure  
884 10C). Each sample was subsequently processed using a unique barcode adapter to allow for  
885 multiplexing multiple samples on the HiSeq (commonly 200million 50bp reads divided among  
886 sequencing samples). Excess adapter sequences was removed using Ampure bead isolation,  
887 which removes all DNA fragments less than 200bp. Finally, the Genomics Core completed the  
888 final quality control of the DNA library prior to sequencing: testing the library fragment size  
889 distribution (High Sensitivity Bioanalyzer) and qPCR analysis using primers that match the library  
890 adapters (Quail et al., 2008) (Figure 10D).

891 Initially, we processed a large number of samples at once with multiplexed sequencing  
892 using HiSeq (8 samples per lane) to minimize high costs of sequencing at the expense of  
893 sequencing depth. We later reran many of the sequencing libraries with less multiplexing,  
894 enabling increased sequencing depth. The corresponding technical replicates were merged  
895 together for differential expression analysis (Figure 10E). The final read counts of each sample is  
896 shown in Figure 10F.

897

### 898 *Differential gene and transcript expression analysis*

899 The completion of sequencing generated tens of millions of reads that are used to

900 compare gene expression levels between isolated ipRGCs (GFP+) and generic RGCs (GFP-).  
901 Well-established, powerful RNA-seq differential expression analysis pipelines have been  
902 developed such as Cuffdiff, EdgeR, and DESeq (Anders and Huber, 2010; Trapnell et al., 2012;  
903 Anders et al., 2013). The Cuffdiff pipeline prioritizes isoform quantification and diversity (Trapnell  
904 et al., 2012). However, the short 50bp single-end reads that are generated in our study are not  
905 well-suited for prioritizing isoform discovery and analysis. Further, Cuffdiff does not fully take  
906 advantage of our purposeful pairwise-comparison between groups. In contrast, the EdgeR  
907 package is better suited for our purpose; it is designed to count the number of reads that align to  
908 an annotated gene (mouse reference genome, in our case) and subsequently performs statistical  
909 analysis on a generated table of counts to identify quantitative changes in expression levels  
910 between the two experimental samples. EdgeR compares and retains the relationship between  
911 all pairs of experimental samples when calculating differential expression likelihood (Anders et  
912 al., 2013). Our analysis filtered out genes with very low counts, less than 1 count per million (cpm),  
913 in more than half of the samples used in the differential expression analysis. This is a common  
914 cutoff and considers 1) that a gene must be expressed at a minimum threshold in order to become  
915 biologically important and 2) that the inclusion of genes with very low counts may negatively affect  
916 the statistical approximations used by the EdgeR pipeline.

917 To identify the set of differentially expressed genes in the ipRGC populations, we used the  
918 following strict criteria. First, we identified genes with low false discovery rate (FDR < 0.05) and  
919 high fold-change (greater than 2-fold) suggesting differential expression between ipRGCs and  
920 generic RGCs. Second, we considered whether the differentially gene expression was  
921 corroborated across both reporters (*Opn4::GFP* labeling M1-M3 cells and the *Opn4::Cre/GFP*  
922 system that labels M1-M6 ipRGCs) and both ages (P5 and adult). Third, we identified whether  
923 the differentially expressed genes have nearly absent gene expression in generic RGC samples  
924 to distinguish potential for selective gene expression in ipRGCs. This was distinguished both at  
925 the level of count-values and manual inspection of aligned raw reads using the Integrated

926 Genome Viewer (IGV) (Thorvaldsdóttir and Robinson, 2013). Using IGV, we verified that the  
927 reads align with reference gene model for full-length coverage across multiple ipRGC replicates  
928 and that there were absent or partial reads aligned across the generic RGC replicates.

929 Determining differentially *repressed* genes in adult ipRGCs was confounded by the high  
930 amount of contaminants in generic RGC populations. We could not decipher whether a gene with  
931 relatively low expression in ipRGCs was the result of non-RGC populations contaminating the  
932 generic RGC control population. In contrast, the P5 generic RGC samples from the *Opn4-GFP*  
933 reporter were determined to have greatly reduced levels of contamination and similar levels of  
934 RGC marker expression (Figure 1—figure supplement 1). This made it possible to identify genes  
935 more weakly expressed in ipRGCs than in generic RGCs in early postnatal development (Figure  
936 2—figure supplement 1).

937

938 **Count-based differential expression pipeline for RNA-seq data using edgeR and/or**  
939 **DESeq.**

```
940 # 1) Assess sequence quality control with FastQC)
941 # 2) remove adapters
942 $ fastx_clipper -Q33 -a adapter_sequence -l 15 -v -i DJB0005.fastq -o ad_DJB0005.fastq
943
944 # 3) remove low quality reads
945 $ fastq_quality_filter -v -Q33 -q 30 -p 90 -i ad_DJB0005.fastq -o adq_DJB0005.fastq
946
947 #####
948
949 # Align the reads (using tophat2) to the reference genome
950 $ tophat2 --no-coverage-search -o DJB05_th2out genome DJB05_merged.fastq
951
952 #####
953
954 # Sort by name, convert to SAM for htseq-count
955 $ samtools sort -n DJB05_th2out/accepted_hits.bam -o DJB05_sortname.bam
956 $ samtools view -o DJB05_sortname.sam DJB05_sortname.bam
957
958 #####
959
960 # COUNT READS USING HTSEQ-COUNT
961 $ htseq-count -s no -a 10 DJB05_sortname.sam genes.gtf > DJB05.count
962
963 #####
964
```

```
965 # Count-based differential analysis with edgeR
966 $ module load R
967 $ cd ~/data/2016_rerun_myrnaseq/
968 $ Rscript edgeR_filter1cpm_updated.R GSad_2016.filelist
969
970 #####
971
972 #Below is script within "edgeR_filter1cpm_updated.R"
973 #!/usr/bin/Rscript
974 #structure of file: 1 col of batch names, 2 columns of sample names, with label at top of each
975 column, tab separated
976 #label1label2
977 #b1 samp1 samp4
978 #b2 samp2 samp5
979 #b3 samp3 samp6
980 #samples in same row are assumed to be in same batch
981 args <- commandArgs(TRUE)
982 filename=args[1]
983 bampath=~"/data/2016_rerun_myrnaseq"
984 annotation=~"/data/2016_rerun_myrnaseq/genes.gtf"
985 baseoutdir=~"/data/2016_rerun_myrnaseq/"
986
987 library(edgeR)
988
989 x=read.table(filename,header=T)
990 label1=colnames(x[1])
991 label2=colnames(x[2])
992 samplelist=c(as.vector(x[,1]),as.vector(x[,2]))
993 conditions=c(rep(label1,nrow(x)),rep(label2,nrow(x)))
994 batch=rep(row.names(x),2)
995 names(conditions)=samplelist
996
997 #convert condition and batch to factors--prob not necessary for DESeq but edgeR likes it
998 condition=factor(conditions)
999 batch=factor(batch)
1000
1001 #set up output directory for this experiment, create if it doesn't exist
1002 outdir=sprintf("%s/%s-%s",baseoutdir,label1,label2)
1003 dir.create(outdir)
1004
1005 #read in count table
1006 count.table=read.table(sprintf("%s/%s-%s-rawcounts.txt",outdir,label1,label2),header=T)
1007
1008 # filtering--keep only reads with > 1cpm in at least half the samples
1009 keep_cpm <- rowSums(cpm(count.table)>1) >=nrow(x)
1010 keep_quantile <- rowSums(count.table)>quantile(rowSums(count.table), probs=.5)
1011
1012 #save output of cpm vs quantile filters to log file
1013 sink(sprintf("%s/edgeR.log",outdir),append=T,split=T)
1014 cat("Comparison table of cpm vs quantile filters. CPM>2 in half of samples, quantile at 50%.\n")
1015 addmargins(table(keep_cpm, keep_quantile))
```

```
1016 sink()
1017 count.table <- count.table[keep_cpm, ]
1018
1019 edesign=model.matrix(~batch+condition)
1020 e <- DGEList(counts=count.table)
1021 e <- calcNormFactors(e)
1022 e <- estimateGLMCommonDisp(e, edesign)
1023 e <- estimateGLMTrendedDisp(e, edesign)
1024 e <- estimateGLMTagwiseDisp(e, edesign)
1025
1026 #print size factors to log file
1027 sink(sprintf("%s/edgeR.log",outdir),append=T,split=T)
1028 cat("Normalization factors:\n")
1029 e$samples
1030 sink()
1031 #print dispersion and PCA plots to pdf
1032 pdf(sprintf("%s/%s-%s-edgeRdispersion.pdf",outdir,label1,label2))
1033 plotBCV(e, cex=0.4, main="edgeR: Biological coefficient of variation (BCV) vs abundance")
1034 dev.off()
1035 pdf(sprintf("%s/%s-%s-edgeRPCA.pdf",outdir,label1,label2))
1036 plotMDS(e, main="edgeR MDS Plot")
1037 dev.off()
1038
1039 #Fit curves to GLM
1040 efit <- glmFit(e, edesign)
1041 efit <- glmLRT(efit, coef=sprintf("condition%s",label1))
1042 #make results table and save
1043 stats <- topTags(efit, n=nrow(e))$table
1044 cpms <- cpm(e,)[rownames(stats),normalized.lib.sizes=T]
1045 etable=data.frame(stats,cpms)
1046 etable <- etable[order(etable$FDR), ]
1047 write.table(etable,file=sprintf("%s/%s-%s-edgeR-
1048 filtered.txt",outdir,label1,label2),quote=F,sep="\t")
1049 #copy sample file (argument) to outdir
1050 file.copy(filename,sprintf("%s/%s-%s-samplelist",outdir,label1,label2))
1051
1052 #####
1053
1054 #Below is script within "GSad_2016.filelist"
1055 GSadPos      GSadNeg
1056 b1      DJB07 DJB08
1057 b2      DJB30 DJB31
1058 b3      DJB28 DJB29
1059 b4      DJB16 DJB21
1060 b5      DJB36 DJB37
1061 b6      DJB38 DJB39
1062
1063 #####
1064
1065
```

1066 *Antibodies for immunohistochemistry:*

1067 For these studies, the following primary antibodies were used: rabbit anti-melanopsin (Advanced  
1068 Targeting Systems; 1:10,000), guinea pig anti-RBPMS (PhosphoSolutions 1832-RBPMS), rabbit  
1069 anti-green fluorescent protein (GFP; Invitrogen); Goat anti-Brn3b antibody (Santa Cruz #sc-  
1070 6026); mouse anti-Rasgrp1 (Santa Cruz sc-8430); guinea pig anti-Tbx20[1:8500] (Song et al.,  
1071 2006)Rabbit anti-Giantin (Abcam ab24586). Secondary antibodies consisted of Alexa Fluor 350,  
1072 488, 594 or 647 donkey anti-goat, Alexa Fluor 594 donkey anti-rabbit and Alexa Fluor 594 goat  
1073 anti-guinea pig.

1074

1075 *Retina Tissue Preparations and Solutions*

1076 Mice were euthanized by inhalation of CO<sub>2</sub>. Prior to removing the eye, the dorsal margin of the  
1077 cornea was marked with a cautery and this was used to guide the placement of a large relieving  
1078 cut in the dorsal retina as a subsequent guide to retinal orientation. Eyes were removed  
1079 immediately after death and placed in Hibernate-A solution preheated to 37 °C. To keep track of  
1080 retinal orientation, the right and left eye were identified and processed separately.

1081

1082 *Immunohistochemistry*

1083 After the retina was removed from the eye, it was placed on Millipore nitrocellulose paper. The  
1084 retinas were fixed for 30 minutes at room temperature using 4% paraformaldehyde freshly  
1085 prepared in 0.1M phosphate buffered saline (PBS; pH 7.4). The tissue was then washed for 15  
1086 minutes in PBS three times. The tissue was then incubated in a blocking solution of 0.5% Triton-  
1087 X and 5% Goat Serum in PBS for two hours at room temperature. The tissue was incubated for  
1088 two nights at 4 °C while on a shaker in the primary antibodies diluted in this same blocking  
1089 solution. The following day, the samples were washed six times for 20 minutes in 0.1% Tween-  
1090 20 in PBS. The tissue was then incubated for two hours in the appropriate Invitrogen or Jackson  
1091 labs secondary antibodies diluted 1:1000 in the blocking solution at room temperature. The tissue



1092 was then washed six times for 10 minutes in 0.1% Tween-20 in PBS. The retinas were then  
1093 mounted in Aquamount, coverslipped, and sealed with fingernail polish.

1094 For Rasgrp1 immunofluorescence studies, an additional antigen retrieval step was included.  
1095 antigen retrieval the tissue was then placed in Tris-EDTA ( pH 8.0) for 30 minutes at 80 °C. The  
1096 samples were then allowed to return to room temperatures (about 15-30 minutes) before they  
1097 were removed from the Tris-EDTA solution and washed three times for 15 minutes in PBS.

1098

#### 1099 *Image Acquisition*

1100 Immunofluorescent images were captured on a Zeiss Confocal (LSM 510) and Nikon Eclipse  
1101 microscope (Micro Video Instruments, Inc. E614, Avon, MA) with a built in Spot Camera  
1102 (Diagnostic Instruments, Inc. HRD 100-NIK Sterling Heights, MI). Confocal images were taken  
1103 with a 20x objective (Plan Apochromat, WD 0.55 mm) at a resolution of 2048 pixels. To enhance  
1104 clarity, image files were pseudocolored and the brightness and contrast was adjusted using  
1105 ImageJ 1.47 (National Insistute of Heath, Bethesda, MD). All final images were constructed using  
1106 ImageJ and Powerpoint (Microsoft Corporation, Redmond, WA).

1107

#### 1108 *Analysis of Rasgrp1 expression in ipRGC subtypes.*

1109 Because M1 and M2 cells have the highest levels of melanopsin expression of the ipRGC  
1110 population, their dendrites were clearly visible and decipherable with immunostaining. M1 cells  
1111 were identified by their dendritic projections to the OFF layer of the inner plexiform layer (IPL).  
1112 M2 cells were identified by their dendrites which monostatify the ON sublamina of the IPL (Berson  
1113 et al. 2010; Schmidt and Kofuji 2009). M3 cells bistratify the ON and OFF sublamina of the IPL  
1114 (Schmidt and Kofuji 2011) and because these cells have similar levels of melanopsin expression  
1115 and soma size as M2 cells, it is likely that M3 cells were included in the M2 population quantified  
1116 in this study.

1117 M4-M6 cells have the lowest levels of melanopsin-expression of the ipRGC population and their  
1118 dendrites were not visible or decipherable with immunostaining. However, at least some members  
1119 of the M4/M5/M6 population had lightly immunoreactive somas (Ecker et al., 2010; Quattrochi et  
1120 al., 2018; Stabio et al., 2018). M4 cells were identified by their large soma size, low melanopsin  
1121 immunodetectability and the lack of dendritic labeling (Estevez et al., 2012). The M5 and M6 cells  
1122 we observed were identified by their low levels of melanopsin labeling and M2-sized somas (Ecker  
1123 et al., 2010; Quattrochi et al., 2018; Stabio et al., 2018).

1124

1125 *Analysis of Tbx20 expression in Cdh3-GFP mice.*

1126 ipRGC subtypes were identified using a combination of morphological clues and process of  
1127 elimination. In the case of M1 and M2 cells, which express the highest levels of melanopsin,  
1128 confocal images of their immunofluorescence reveal dendritic information. As a result, unique  
1129 dendritic features distinguish M1 and M2 cells. Cells with dendrites stratifying in the OFF layer of  
1130 the IPL were identified as M1 cells, whereas cells stratifying in the ON layer were identified as M2  
1131 cells (Berson et al. 2010; Schmidt and Kofuji 2009). Using this method, M3 cells, which stratify  
1132 in the ON and OFF sublamina of the IPL, were included in the M1 cell population unless otherwise  
1133 noted (Schmidt and Kofuji 2011). As a result of their low levels of melanopsin, M4 and M5/6 cells  
1134 are weakly labeled using anti-melanopsin immunohistochemistry with only some of their somata,  
1135 but no dendrites, visible (Ecker et al., 2010; Estevez et al., 2012; Quattrochi et al., 2018; Stabio  
1136 et al., 2018). Therefore, the method employed for deciphering M1 and M2 cells cannot be used  
1137 to identify M4 and M5/6 cells. Instead, M4 cells were categorized by their lack of dendritic labeling,  
1138 and their large soma size (Estevez et al., 2012). M5/6 cells were characterized by their lack of  
1139 dendritic labeling, M2-sized somata, and process of elimination (Ecker et al., 2010; Estevez et al.,  
1140 2012; Quattrochi et al., 2018; Stabio et al., 2018). In other words, cells that were not stained by  
1141 the melanopsin antibody (which would detect M1-M3), but were labeled by GFP (labeling M1-  
1142 M6), and had small somata, fell into the M5/6 category.

1143

1144 *Brain injection of retrobeads into suprachiasmatic nucleus*

1145 Adult wild type mice (P30-P60) were anaesthetized with isoflurane and fluorescently labelled  
1146 rhodamine latex microspheres (RetroBeads, Lumafluor) were injected into the ipsilateral  
1147 suprachiasmatic nucleus to retrogradely label RGCs with axon terminals at the injections site.  
1148 Three to five days later, the brain was removed and immediately fixed overnight. The following  
1149 day, the brain was rinsed in 0.1M PBS and sectioned at 50um in the coronal plane. The slices  
1150 were incubated with DAPI staining for 10 minutes was done in order to provide a reference for  
1151 SCN location as indicated by concentrated cellular staining at the SCN. The slices were imaged  
1152 for DAPI in UV channel and overlaid with rhodamine channel to identify the injection site in  
1153 relation to SCN location. Special attention was paid to ensure that the injection did not extend into  
1154 optic nerve and confound results by introducing off-target RGC labeling of fibers of passage.

1155

1156 *Brain histology*

1157 Animals were sacrificed via transcardial perfusion, and brains were removed and incubated in 4%  
1158 paraformaldehyde overnight. Brains were sectioned at 50µm in the coronal plane. To reveal  
1159 individual processes in viral tracing experiments, virallyexpressed EYFP was enhanced using  
1160 rabbit-anti-gfp (1:1000) and goat-anti-rabbit alexa 488 (1:500). To observe parvalbumin  
1161 expression in OPN neurons, parvalbumin immunohistochemistry was performed using mouse-  
1162 anti-parvalbumin (1:1000) followed by goat-anti-mouse alexa 488.

1163 Stained and sliced brain slices were mounted on glass cover slides and imaged using a SPOT  
1164 RT Slider digital microscope camera mounted to a Nikon (Diagnostic Instruments) as described  
1165 previously (Berson et al., 2010; Estevez et al., 2012). Images were assembled in Adobe  
1166 Photoshop CS3.

1167

1168

1169

1170

1171

1172

1173 **Figure legends (see attached PDF for figure images)**

1174

1175 **Figure 1. Experimental design of gene expression profiling from purified ipRGCs and**  
1176 **comparison with generic RGCs.**

1177 A. Two transgenic reporters were used for gene expression profiling of ipRGCs. The BAC  
1178 transgenic *Opn4*-GFP labels M1-M3 ipRGCs while the *Opn4*-Cre crossed with a cre-dependent  
1179 GFP reporter labels M1-M6 ipRGCs. B. Schematic of the gene expression profiling procedure. 1)  
1180 Isolation of cell populations from enzymatically dissociated retinas. 2) The surface protein Thy-1  
1181 is enriched in RGCs, this high affinity of Thy1-conjugated magnetic beads to RGCs was used to  
1182 enrich the extracted cell populations with RGCs. 3) Fluorescence-activated cell sorting (FACS)  
1183 was used to isolate GFP-positive cells (ipRGCs) from GFP-negative cells (cRGCs). These two  
1184 populations were isolated in parallel to provide direct internal testing of ipRGCs versus cRGCs  
1185 under the same treatments, conditions, and genetic backgrounds. 4) The RNA of these two main  
1186 populations was subjected to mRNA extraction. 5) The RNA was converted to cDNA and amplified  
1187 using Nugen Ovation RNA amplification system. 6) Illumina Truseq sequencing libraries were  
1188 prepared by ligating adapters to the cDNA. Single-end 50 base pair sequencing was completed  
1189 using the Illumina HiSeq system. 7) Differentially expressed genes were determined using EdgeR  
1190 bioinformatics pipeline. See Methods for details.

1191 B. EdgeR multi-dimensional scaling (MDS) plot illustrates the overall similarity between  
1192 expression profiles of different samples. Each sample is denoted by a letter ("i" for ipRGCs; c for  
1193 cRGCs) and a number, corresponding to particular replicate, comprising one pool of purified  
1194 RGCs then divided into the two pools. Numbering scheme represents paired ipRGCs (GFP+) and

1195 cRGCs (GFP-) replicates (i.e., ipRGC sample 'i1' was processed in parallel with cRGC sample  
1196 'c1', sample 'i2' with 'c2', etc.). Distances are approximately the log<sub>2</sub> fold changes between  
1197 samples. Green and gray ovals represent ipRGC (GFP+) and cRGC (GFP-) samples,  
1198 respectively. Adapted from EdgeR simple graphical output of individual samples in 2D space.

1199

1200 **Figure 1—figure supplement 1. Purity and cell composition assessment of ipRGC and**  
1201 **generic RGC samples.**

1202 Heat map of known cell type marker gene expression in the retina to assess purity and cell  
1203 composition of ipRGC and generic RGC samples. Shown are biological replicates tested for  
1204 *Opn4-GFP* (P5 and adult) and *Opn4-Cre/GFP* reporters. Relative expression levels, fold change,  
1205 and false discovery rate (FDR) are color-coded as indicated in the figure. White boxes indicate  
1206 high gene expression, while blue represents little or no detected expression. FDR is not available  
1207 ("NA") in cases that our analysis filtered out genes with very low counts, less than 1 count per  
1208 million (cpm), in more than half of the samples used in the differential expression analysis.

1209

1210 **Figure 2. The expression pattern of candidate ipRGC-specific genes.**

1211 Heat map of 83 genes differentially expressed in ipRGCs that have functional links to GPCR  
1212 signaling, regulation and maintenance of molecular programs, neuron communication and  
1213 organization, neuron survival, and neuron-glia interactions. Relative expression levels, fold  
1214 change, and FDR are color-coded as indicated in the figure.

1215

1216 **Figure 2—figure supplement 1.**

1217 Heat map of genes differentially expressed in adult ipRGCs labeled by the *Opn4-Cre/GFP*  
1218 reporter (M1-M6 ipRGCs) compared to *Opn4-GFP* (M1-M3 ipRGCs). Relative expression levels,  
1219 fold change, and FDR are color-coded as indicated in the figure.

1220

1221 **Figure 2—figure supplement 2.**

1222 Heat map of genes encoding for nicotinic acetylcholine, dopamine, serotonin, glycine, glutamate,  
1223 and melatonin receptors. Relative expression levels, fold change, and FDR are color-coded as  
1224 indicated in the figure.

1225

1226 **Figure 2—figure supplement 3. The expression pattern of developmentally regulated genes**  
1227 **in ipRGCs.**

1228 A. Heat map of genes encoding transcription factors that have a particular temporal pattern of  
1229 differential expression in ipRGCs (e.g., high gene expression in P5 ipRGCs relative to adult  
1230 expression). Relative expression levels, fold change, and FDR are color-coded as indicated in  
1231 the figure.

1232 B. Heat map of genes relevant for development of ipRGCs. Relative expression levels, fold  
1233 change, and FDR are color-coded as indicated in the figure.

1234

1235 **Figure 2—figure supplement 4.**

1236 A. Distinct from rod and cone photoreceptors, the light-activation of Opn4 triggers a membrane-  
1237 bound signaling cascade including  $G_{q/11}$  type G-proteins, the generation of 1,2-diacylglycerol  
1238 (DAG) by PLC $\beta$ 4, the opening of downstream TRPC6 and TRPC7 channels, and ultimately leads  
1239 to the influx of calcium through L-type voltage-gated calcium channels.

1240 B. Heat map of genes that are potentially relevant to the Opn4-mediated phototransduction  
1241 signaling cascade. Relative expression levels, fold change, and FDR are color-coded as indicated  
1242 in the figure.

1243 C. Heat map of genes previously described to play a role in the light response, dark adaptation,  
1244 and chromophore regeneration of rod and cone photoreceptors. Relative expression levels, fold  
1245 change, and FDR are color-coded as indicated in the figure.

1246

1247 **Figure 3. Rasgrp1 is selectively expressed in ipRGCs.**

1248 A. Whole mount retina immunostained for Opn4, Rasgrp1, and the pan-RGC marker Rbpms  
1249 (gray-scale). Focal plane is at the ganglion cell layer (GCL). We quantified co-localization of the  
1250 three markers in confocal images of 49 regions that were topographically dispersed across three  
1251 whole-mount adult retinas.

1252 B. Co-localization of Rasgrp1 (green), Rbpms (red), and Opn4 (magenta). Rasgrp1 is expressed  
1253 in a subpopulation of amacrine cells and RGCs (Rbpms-negative and -positive, respectively).  
1254 Scale bar, 20  $\mu$ m.

1255 C. Rasgrp1 immunolabeling (antibody sc-8430) of cell bodies in GCL of Rasgrp1<sup>+/-</sup> heterozygous  
1256 mice (left, yellow arrows). Absence of cell body immunolabeling in Rasgrp1<sup>-/-</sup> knockout mice (right)  
1257 suggests a lack of cellular off-target antibody staining.

1258 D. Quantification of Rasgrp1-expression across Opn4-immunopositive ipRGC subtypes. 70% of  
1259 M1 cells were Rasgrp1 immunopositive while only 20-30% of either M2, M5 or M6 cells were  
1260 Rasgrp1 immunopositive. None of the identified M4 cells were Rasgrp1 immunopositive. M1 and  
1261 M3 types were combined during the process of co-expression analysis (designated "M1/M3").  
1262 Error bars represent standard error of the mean.

1263

1264 **Figure 3—figure supplement 1.**

1265 A. Distribution of all Rasgrp1-expressing RGCs (Rasgrp1<sup>+</sup>;Rbpms<sup>+</sup>) that belong to specific RGC  
1266 types, to the extent that could be determined, including Opn4-immunoreactive ipRGC subtypes.  
1267 No examples of M4 cells were observed to express Rasgrp1. The vast majority (96%) of Rasgrp1-  
1268 RGCs are Opn4-immunopositive and therefore ipRGCs. The remaining "unknown" RGC types  
1269 expressing Rasgrp1 (Rasgrp1<sup>+</sup> ; Rbpms<sup>+</sup> ; Opn4<sup>neg.</sup>) could be a low-expressing ipRGC type or  
1270 conventional RGCs. Error bars represent standard error of the mean.

1271 B. Areas sampled for two wholemount wild type retinas immunostained for Rasgrp1, Opn4 and  
1272 RBPMS. Yellow squares represent the locations of confocal images used for cell quantification.

1273 C. Analysis of the M1-M3 ipRGC population did not suggest a gradient of ipRGC spatial  
1274 distribution across the retina. Seven frames were used to represent each area of the retina to  
1275 maintain equal spatial contribution. Total M1-M3 represented in the dorsal-ventral and nasal-  
1276 temporal columns is 217.

1277 E. Analysis of the M1 cell population revealed a slight naso-temporal gradient of M1 spatial  
1278 distribution across the retina. Seven frames were used to represent each area of the retina to  
1279 maintain equal spatial contribution. Total M1s represented in the dorsal-ventral column and nasal-  
1280 temporal columns is 113 and 110, respectively.

1281 F. Analysis of the Rasgrp1-positive RGC population suggests a slight ventral-dorsal gradient of  
1282 Rasgrp1-positive RGCs spatial distribution across the retina. Seven frames were used to  
1283 represent each area of the retina to maintain equal spatial contribution. Total Rasgrp1-positive  
1284 RGCs represented in the dorsal-ventral column and nasal-temporal column is 117 and 118,  
1285 respectively.

1286 F. The amacrine cells (presumed) expressing Rasgrp1 exhibited a dramatic center-peripheral  
1287 gradient of Rasgrp1-positive non-RGC spatial distribution across the retina. Four frames were  
1288 used to represent each area of the retina to maintain equal spatial contribution. The total Rasgrp1-  
1289 positive non-RGCs represented in the periphery and center was 314.

1290

1291 **Figure 4. Colocalization study of Tbx20-expression in ipRGC subtypes.**

1292 A. Triple immunofluorescence of Opn4, Tbx20, and *Cdh3-GFP* (gray scale).

1293 B. Tbx20-expression in subset of M1-M3 ipRGCs as well as an additional population of Opn4-  
1294 immunonegative cells.

1295 B,C. Tbx20 is concentrated in the nucleus of most *Cdh3-GFP*-cells.

1296 D. Quantification of Tbx20-expression across Opn4-immunopositive ipRGC subtypes. Tbx20  
1297 immunofluorescence labels multiple ipRGC subtypes, including M1s, M2 cells and small soma,  
1298 low Opn4 expression cells (presumptive M5/6 ipRGCs), and *Cdh3-GFP* cells (M6-type enriched).



1299 M2 and M3 types were combined during the process of co-expression analysis (designated  
1300 “M2/M3”). Error bars represent standard error of the mean.

1301

1302 **Figure 4—figure supplement 1. Coexpression study of Tbx20 with Opn4-Cre/GFP and Tbr2,**  
1303 **including distribution of Tbx20-expression across ipRGC subtypes.**

1304 A-C. Quadruple immunofluorescence of Opn4, Tbx20, Opn4-Cre/GFP, and Tbr2. Scale bar, 20  
1305  $\mu\text{m}$ .

1306 A. Gray scale of Opn4, Opn4-Cre/GFP, and Tbx20 immunofluorescence.

1307 B. Co-expression study of Tbx20 (green) in the context of Opn4 (magenta) and *Opn4-Cre/GFP*  
1308 (red) labeling. GFP cells that are Opn4-immunonegative are inferred M4-M6 types.

1309 C. Co-expression analysis of Tbr2 (magenta) with Tbx20 (green).

1310 D. Distribution of Tbx20 expressing cells that belong to specific RGC types, to the extent that  
1311 could be determined, including Opn4-immunoreactive ipRGC subtypes and RGCs labeled by the  
1312 *Cdh3-GFP* transgenic reporter. Unaccounted Tbx20-expressing cells are designated as  
1313 “unknown” RGC types. Error bars represent standard error of the mean.

1314

1315

1316 **Figure 5. Complex pattern of Rasgrp1-Tbx20-Brn3b co-expression suggests further**  
1317 **diversity in ipRGC family.**

1318 A. Quadruple immunofluorescence study of Tbx20, Brn3b, Opn4, and Rasgrp1 (gray-scale).

1319 B. Rasgrp1 and Opn4 (left panel) were initially quantified for ipRGC subtype expression prior to  
1320 comparison with Tbx20 (middle panel) and Brn3b (right panel) expression. Rasgrp1, Brn3b, and  
1321 Tbx20 expression are partially overlapping.

1322 C. Integrated co-expression patterns of Brn3b, Rasgrp1, and Tbx20 with M1 and M2 ipRGC  
1323 subtypes. The M1 group includes displaced M1 and M3 types.

1324

1325 **Figure 5—figure supplement 1. Topographic distribution and ipRGC subtype-specific**  
1326 **quantification of Rasgrp1-Tbx20-Brn3b expression.**

1327 A. Comparison of co-expression patterns of Brn3b, Rasgrp1, and Tbx20 within group of combined  
1328 M1-M3 (M1+M2+M3) ipRGCs, the M1/3 ipRGCs (M1+M3), displaced M1s, and M2 ipRGCs.

1329 B. Lack of major topographic variations in the fraction of M1/M3 ipRGCs immunoreactive for  
1330 Rasgrp1, Tbx20, and Brn3b.

1331 C. Comparison of Rasgrp1-Tbx20-Brn3b expression pattern in M2 ipRGCs across dorsal, center,  
1332 and ventral regions of the retina.

1333 D. Distribution of Tbx20-expression in M1-M3 ipRGCs compared to Opn4-immunonegative cells  
1334 in the context of topographic regions across the retina.

1335

1336 **Figure 6. The ipRGCs projecting to the suprachiasmatic nucleus (SCN) have a molecularly**  
1337 **diverse pattern of Rasgrp1 and Tbx20 expression.**

1338 A. Experimental design of fluorescent bead injection to SCN, followed by examination of Rasgrp1  
1339 and Tbx20 expression in retrograde labeled RGCs.

1340 B. Neuroanatomical study to verify that retrograde injection is within the SCN, but not the optic  
1341 nerve.

1342 B. Triple immunofluorescence of Opn4, Rasgrp1, and Tbx20 in combination with fluorescent  
1343 Retrobeads. Retrobeads were mostly observed in Opn4-immunopositive RGCs (M1-M3 ipRGCs).

1344 Quantification of Rasgrp1 and Tbx20 in retrolabeled cells.

1345 D. SCN-projecting ipRGCs in the ipsilateral and contralateral retina are molecularly diverse for  
1346 Tbx20 and Rasgrp1 expression.

1347

1348 **Figure 7. Current model of ipRGC family members integrating molecular, physiology, brain**  
1349 **circuitry, and morphology (see text for details).**

1350

1351 **Figure 8. Coexpression of BAC transgenic Opn4-GFP reporter with Opn4**  
1352 **immunoreactivity.**

1353 A. Immunofluorescence of anti-Opn4 staining of whole mount retina from transgenic *Opn4-GFP*  
1354 mice with fluorescent protein expression in ipRGCs. Red, Opn4-immunolabeling; green,  
1355 fluorescently labeled cells; yellow, merged co-localized labeling pattern. Scale bar, 20  $\mu$ m.

1356 B. Co-expression of *Opn4-Cre/GFP* labeling with immunofluorescence of anti-Opn4 staining of  
1357 whole mount retina. Red, Opn4-immunolabeling; green, fluorescently labeled cells; yellow,  
1358 merged co-localized labeling pattern. Scale bar, 20  $\mu$ m.

1359 C. Quantification of labeling efficiency of Opn4-immunolabeled M1-M3 ipRGCs by *Opn4-*  
1360 *Cre/GFP*. Additional comparison of GFP-labeling in low Opn4-expressing ipRGC subtypes M4  
1361 (large soma) and M5/6 (small soma).

1362

1363 **Figure 9. Fluorescence activated cell sorting (FACS) gating strategy for isolating ipRGCs**  
1364 **(GFP+) in parallel with GFP-negative cells that are enriched for RGCs.**

1365 A-C. Healthy cells were selected against death marker 7-AAD (not G1). The ipRGCs (GFP+) and  
1366 generic RGCs (GFP-) cells were selected based on intensity and similar relative cell size ultimately  
1367 using gates G2A and G3A, respectively.

1368 A. Example sort from retina of postnatal day 4 (P4) *Opn4-GFP* mouse.

1369 C. Example sort from retina of young adult *Opn4-GFP* mouse, with noticeably higher debris and  
1370 cell death.

1371 D. Microscopy testing of accurate sorting of GFP+ cells isolated from P4 *Opn4-Cre/GFP* mouse.

1372

1373 **Figure 10. Steps involved with processing mRNA extracted from purified cell populations**  
1374 **and preparing for RNA-sequencing (see Methods for details).**

1375

1376 **References**

- 1377 Anders S, Huber W (2010) Differential expression analysis for sequence count data. *Genome*  
1378 *Biology* 11:10 11:R106.
- 1379 Anders S, McCarthy DJ, Chen Y, Okoniewski M, Smyth GK, Huber W, Robinson MD (2013)  
1380 Count-based differential expression analysis of RNA sequencing data using R and  
1381 Bioconductor. *Nature Protocols* 8:1765–1786.
- 1382 Atlasz T, Szabadfi K, Kiss P, Racz B, Gallyas F, Tamas A, Gaal V, Marton Z, Gabriel R, Reglodi  
1383 D (2010) Pituitary adenylate cyclase activating polypeptide in the retina: focus on the  
1384 retinoprotective effects. *Ann N Y Acad Sci* 1200:128–139.
- 1385 Barres BA, Silverstein BE, Corey DP, Chun LLY (1988) Immunological, morphological, and  
1386 electrophysiological variation among retinal ganglion cells purified by panning. *Neuron*  
1387 1:791–803.
- 1388 Bedont JL, Blackshaw S (2015) Constructing the suprachiasmatic nucleus: a watchmaker's  
1389 perspective on the central clockworks. *Front Syst Neurosci* 9:74.
- 1390 Beglopoulos V, Montag-Sallaz M, Rohlmann A, Piechotta K, Ahmad M, Montag D, Missler M  
1391 (2005) Neurexophilin 3 is highly localized in cortical and cerebellar regions and is  
1392 functionally important for sensorimotor gating and motor coordination. *Mol Cell Biol*  
1393 25:7278–7288.
- 1394 Berson DM, Castrucci AM, Provencio I (2010) Morphology and mosaics of melanopsin-  
1395 expressing retinal ganglion cell types in mice. *Journal of Comparative Neurology* 518:2405–  
1396 2422.
- 1397 Bivona TG, Pérez De Castro I, Ahearn IM, Grana TM, Chiu VK, Lockyer PJ, Cullen PJ, Pellicer  
1398 A, Cox AD, Phillips MR (2003) Phospholipase Cgamma activates Ras on the Golgi  
1399 apparatus by means of RasGRP1. *Nature* 424:694–698.
- 1400 Brewer GJ (1997) Isolation and culture of adult rat hippocampal neurons. *Journal of*  
1401 *Neuroscience Methods* 71:143–155.
- 1402 Brewer GJ, Torricelli JR (2007) Isolation and culture of adult neurons and neurospheres. *Nature*  
1403 *Protocols* 2:1490–1498.
- 1404 Brewer GJ, Torricelli JR, Evege EK, Price PJ (1993) Optimized survival of hippocampal neurons  
1405 in B27-supplemented neurobasal™, a new serum-free medium combination. *Journal of*  
1406 *Neuroscience Research* 35:567–576.
- 1407 Burden-Gulley SM, Brady-Kalnay SM (1999) PTPmu regulates N-cadherin-dependent neurite  
1408 outgrowth. *J Cell Biol* 144:1323–1336.
- 1409 Cahoy JD, Emery B, Kaushal A, Foo LC, Zamanian JL, Christopherson KS, Xing Y, Lubischer  
1410 JL, Krieg PA, Krupenko SA, Thompson WJ, Barres BA (2008) A transcriptome database for  
1411 astrocytes, neurons, and oligodendrocytes: a new resource for understanding brain  
1412 development and function. *J Neurosci* 28:264–278.

- 1413 Cai C-L, Zhou W, Yang L, Bu L, Qyang Y, Zhang X, Li X, Rosenfeld MG, Chen J, Evans S  
1414 (2005) T-box genes coordinate regional rates of proliferation and regional specification  
1415 during cardiogenesis. *Development* 132:2475–2487.
- 1416 Cameron EG, Robinson PR (2014)  $\beta$ -Arrestin-Dependent Deactivation of Mouse Melanopsin  
1417 Craft CM, ed. *PLoS ONE* 9:e113138.
- 1418 Caretti E, Devarajan K, Coudry R, Ross E, Clapper ML, Cooper HS, Bellacosa A (2008)  
1419 Comparison of RNA amplification methods and chip platforms for microarray analysis of  
1420 samples processed by laser capture microdissection. *Journal of Cellular Biochemistry*  
1421 103:556–563.
- 1422 Carson CT, Kinzler ER, Parr BA (2000) Tbx12, a novel T-box gene, is expressed during early  
1423 stages of heart and retinal development. *Mechanisms of Development* 96:137–140.
- 1424 Carson CT, Pagratis M, Parr BA (2004) Tbx12 regulates eye development in *Xenopus* embryos.  
1425 *Biochemical and Biophysical Research Communications* 318:485–489.
- 1426 Chen SK, Badea TC, Hattar S (2011) Photoentrainment and pupillary light reflex are mediated  
1427 by distinct populations of ipRGCs. *Nature* 476:92–95.
- 1428 Clément-Ziza M, Gentien D, Lyonnet S, Thiery J-P, Besmond C, Decraene C (2009) Evaluation  
1429 of methods for amplification of picogram amounts of total RNA for whole genome  
1430 expression profiling. *BMC Genomics* 10:246.
- 1431 Craig AM, Kang Y (2007) Neurexin-neurologin signaling in synapse development. *Current*  
1432 *Opinion in Neurobiology* 17:43–52.
- 1433 Cui Q, Ren C, Sollars PJ, Pickard GE, So KF (2015) The injury resistant ability of melanopsin-  
1434 expressing intrinsically photosensitive retinal ganglion cells. *Neuroscience* 284:845–853.
- 1435 de Sevilla Müller LP, Sargoy A, Rodriguez AR, Brecha NC (2014) Melanopsin Ganglion Cells  
1436 Are the Most Resistant Retinal Ganglion Cell Type to Axonal Injury in the Rat Retina Tosini  
1437 G, ed. *PLoS ONE* 9:e93274.
- 1438 de Wit J, Sylwestrak E, O'Sullivan ML, Otto S, Tiglio K, Savas JN, Yates JR, Comoletti D, Taylor  
1439 P, Ghosh A (2009) LRRTM2 interacts with Neurexin1 and regulates excitatory synapse  
1440 formation. *Neuron* 64:799–806.
- 1441 Diaz A, Ruiz F, Flórez J, Hurlé MA, Pazos A (1995) Mu-opioid receptor regulation during opioid  
1442 tolerance and supersensitivity in rat central nervous system. *J Pharmacol Exp Ther*  
1443 274:1545–1551.
- 1444 Dođrul A, Yeşilyurt O, İşimer A, Güzeldemir ME (2001) L-type and T-type calcium channel  
1445 blockade potentiate the analgesic effects of morphine and selective mu opioid agonist, but  
1446 not to selective delta and kappa agonist at the level of the spinal cord in mice. *Pain* 93:61–  
1447 68.
- 1448 Dower NA, Stang SL, Bottorff DA, Ebinu JO, Dickie P, Ostergaard HL, Stone JC (2000)  
1449 RasGRP is essential for mouse thymocyte differentiation and TCR signaling. *Nat Immunol*  
1450 1:317–321.

- 1451 Duan X, Qiao M, Bei F, Kim I-J, He Z, Sanes JR (2015) Subtype-Specific Regeneration of  
1452 Retinal Ganglion Cells following Axotomy: Effects of Osteopontin and mTOR Signaling.  
1453 *Neuron* 85:1244–1256.
- 1454 Dumitrescu ON, Pucci FG, Wong KY, Berson DM (2009) Ectopic retinal ON bipolar cell  
1455 synapses in the OFF inner plexiform layer: Contacts with dopaminergic amacrine cells and  
1456 melanopsin ganglion cells. *Journal of Comparative Neurology* 517:226–244.
- 1457 Ebinu JO, Bottorff DA, Chan EY, Stang SL, Dunn RJ, Stone JC (1998) RasGRP, a Ras guanyl  
1458 nucleotide- releasing protein with calcium- and diacylglycerol-binding motifs. *Science*  
1459 280:1082–1086.
- 1460 Ecker JL, Dumitrescu ON, Wong KY, Alam NM, Chen S-K, LeGates T, Renna JM, Prusky GT,  
1461 Berson DM, Hattar S (2010) Melanopsin-Expressing Retinal Ganglion-Cell Photoreceptors:  
1462 Cellular Diversity and Role in Pattern Vision. *Neuron* 67:49–60.
- 1463 Eide EJ, Woolf MF, Kang H, Woolf P, Hurst W, Camacho F, Vielhaber EL, Giovanni A, Virshup  
1464 DM (2005) Control of mammalian circadian rhythm by CKIepsilon-regulated proteasome-  
1465 mediated PER2 degradation. *Mol Cell Biol* 25:2795–2807.
- 1466 Emanuel AJ, Do MTH (2015) Melanopsin Tristability for Sustained and Broadband  
1467 Phototransduction. *Neuron* 85:1043–1055.
- 1468 Emanuel AJ, Kapur K, Do MTH (2017) Biophysical Variation within the M1 Type of Ganglion  
1469 Cell Photoreceptor. *Cell Rep* 21:1048–1062.
- 1470 Estevez ME, Fogerson PM, Ilardi MC, Borghuis BG, Chan E, Weng S, Auferkorte ON, Demb  
1471 JB, Berson DM (2012) Form and function of the M4 cell, an intrinsically photosensitive  
1472 retinal ganglion cell type contributing to geniculocortical vision. *J Neurosci* 32:13608–13620.
- 1473 Fernandez DC, Chang Y-T, Hattar S, Chen S-K (2016) Architecture of retinal projections to the  
1474 central circadian pacemaker. *Proc Natl Acad Sci USA* 113:6047–6052.
- 1475 Fink M, Lesage F, Duprat F, Heurteaux C, Reyes R, Fosset M, Lazdunski M (1998) A neuronal  
1476 two P domain K<sup>+</sup> channel stimulated by arachidonic acid and polyunsaturated fatty acids.  
1477 *EMBO J* 17:3297–3308.
- 1478 Fornaro M, Raimondo S, Lee JM, Giuseppina Giacobini-Robecchi M (2007) Neuron-specific Hu  
1479 proteins sub-cellular localization in primary sensory neurons. *Annals of Anatomy -*  
1480 *Anatomischer Anzeiger* 189:223–228.
- 1481 Frings S, Brüll N, Dzeja C, Angele A, Hagen V, Kaupp UB, Baumann A (1998) Characterization  
1482 of ether-à-go-go channels present in photoreceptors reveals similarity to IK<sub>x</sub>, a K<sup>+</sup> current in  
1483 rod inner segments. *J Gen Physiol* 111:583–599.
- 1484 Gorentla BK, Wan C-K, Zhong X-P (2011) Negative regulation of mTOR activation by  
1485 diacylglycerol kinases. *Blood* 117:4022–4031.
- 1486 Graham DM, Wong KY, Shapiro P, Frederick C, Pattabiraman K, Berson DM (2008) Melanopsin  
1487 Ganglion Cells Use a Membrane-Associated Rhabdomic Phototransduction Cascade.  
1488 *Journal of Neurophysiology* 99:2522–2532.

- 1489 Haeryfar SMM, Hoskin DW (2004) Thy-1: More than a Mouse Pan-T Cell Marker. *The Journal of*  
1490 *Immunology* 173:3581–3588.
- 1491 Hannibal J, Hindersson P, Østergaard J, Georg B, Heegaard S, Larsen PJ, Fahrenkrug J (2004)  
1492 Melanopsin Is Expressed in PACAP-Containing Retinal Ganglion Cells of the Human  
1493 Retinohypothalamic Tract. *Invest Ophthalmol Vis Sci* 45:4202–4209.
- 1494 Hartwick ATE, Bramley JR, Yu J, Stevens KT, Allen CN, Baldrige WH, Sollars PJ, Pickard GE  
1495 (2007) Light-evoked calcium responses of isolated melanopsin-expressing retinal ganglion  
1496 cells. *J Neurosci* 27:13468–13480.
- 1497 Hattar S, Kumar M, Park A, Tong P, Tung J, Yau K-W, Berson DM (2006) Central projections of  
1498 melanopsin-expressing retinal ganglion cells in the mouse. *J Comp Neurol* 497:326–349.
- 1499 Heiman M, Schaefer A, Gong S, Peterson JD, Day M, Ramsey KE, Suárez-Fariñas M, Schwarz  
1500 C, Stephan DA, Surmeier DJ, Greengard P, Heintz N (2008) A Translational Profiling  
1501 Approach for the Molecular Characterization of CNS Cell Types. *Cell* 135:738–748.
- 1502 Hinman MN, Lou H (2008) Diverse molecular functions of Hu proteins. *Cell Mol Life Sci*  
1503 65:3168–3181.
- 1504 Hoshi H, Liu W-L, Massey SC, Mills SL (2009) ON inputs to the OFF layer: bipolar cells that  
1505 break the stratification rules of the retina. *J Neurosci* 29:8875–8883.
- 1506 Hu C, Hill DD, Wong KY (2013) Intrinsic physiological properties of the five types of mouse  
1507 ganglion-cell photoreceptors. *Journal of Neurophysiology* 109:1876–1889.
- 1508 Hughes S, Hankins MW, Foster RG, Peirson SN (2012) Melanopsin phototransduction: slowly  
1509 emerging from the dark. *Prog Brain Res* 199:19–40.
- 1510 Hughes S, Jagannath A, Hickey D, Gatti S, Wood M, Peirson SN, Foster RG, Hankins MW  
1511 (2015) Using siRNA to define functional interactions between melanopsin and multiple G  
1512 Protein partners. *Cell Mol Life Sci* 72:165–179.
- 1513 Jain V, Ravindran E, Dhingra NK (2012) Differential expression of Brn3 transcription factors in  
1514 intrinsically photosensitive retinal ganglion cells in mouse. *Journal of Comparative*  
1515 *Neurology* 520:742–755.
- 1516 Jeon C-J, Strettoi E, Masland RH (1998) The Major Cell Populations of the Mouse Retina. *J*  
1517 *Neurosci* 18:8936–8946.
- 1518 Ji M, Zhao W-J, Dong L-D, Miao Y, Yang X-L, Sun X-H, Wang Z (2011) RGS2 and RGS4  
1519 modulate melatonin-induced potentiation of glycine currents in rat retinal ganglion cells.  
1520 *Brain Research* 1411:1–8.
- 1521 Kim I-J, Zhang Y, Meister M, Sanes JR (2010) Laminar restriction of retinal ganglion cell  
1522 dendrites and axons: subtype-specific developmental patterns revealed with transgenic  
1523 markers. *J Neurosci* 30:1452–1462.

- 1524 Koussounadis A, Langdon SP, Um IH, Harrison DJ, Smith VA (2015) Relationship between  
1525 differentially expressed mRNA and mRNA-protein correlations in a xenograft model system.  
1526 *Sci Rep* 5:10775.
- 1527 Li S, Yang C, Zhang L, Gao X, Wang X, Liu W, Wang Y, Jiang S, Wong YH, Zhang Y, Liu K  
1528 (2016) Promoting axon regeneration in the adult CNS by modulation of the  
1529 melanopsin/GPCR signaling. *Proc Natl Acad Sci USA* 113:1937–1942.
- 1530 Li S-Y, Yau S-Y, Chen B-Y, Tay DK, Lee VWH, Pu M-L, Chan HHL, So K-F (2008) Enhanced  
1531 Survival of Melanopsin-expressing Retinal Ganglion Cells After Injury is Associated with the  
1532 PI3 K/Akt Pathway. *Cell Mol Neurobiol* 28:1095–1107.
- 1533 Lin JC, Ho W-H, Gurney A, Rosenthal A (2003) The netrin-G1 ligand NGL-1 promotes the  
1534 outgrowth of thalamocortical axons. *Nature Neuroscience* 6:1270–1276.
- 1535 Lin Z, Liu J, Ding H, Xu F, Liu H (2018) Structural basis of SALM5-induced PTP $\delta$  dimerization  
1536 for synaptic differentiation. *Nature Communications* 9:268.
- 1537 Lipina TV, Prasad T, Yokomaku D, Luo L, Connor SA, Kawabe H, Wang YT, Brose N, Roder  
1538 JC, Craig AM (2016) Cognitive Deficits in Calsyntenin-2-deficient Mice Associated with  
1539 Reduced GABAergic Transmission. *Neuropsychopharmacology* 41:802–810.
- 1540 Lobo MK, Karsten SL, Gray M, Geschwind DH, Yang XW (2006) FACS-array profiling of striatal  
1541 projection neuron subtypes in juvenile and adult mouse brains. *Nature Neuroscience* 9:443–  
1542 452.
- 1543 Macosko EZ, Basu A, Satija R, Nemesh J, Shekhar K, Goldman M, Tirosh I, Bialas AR,  
1544 Kamitaki N, Martersteck EM, Trombetta JJ, Weitz DA, Sanes JR, Shalek AK, Regev A,  
1545 McCarroll SA (2015) Highly Parallel Genome-wide Expression Profiling of Individual Cells  
1546 Using Nanoliter Droplets. *Cell* 161:1202–1214.
- 1547 Mao C-A, Kiyama T, Pan P, Furuta Y, Hadjantonakis A-K, Klein WH (2008) Eomesodermin, a  
1548 target gene of Pou4f2, is required for retinal ganglion cell and optic nerve development in  
1549 the mouse. *Development* 135:271–280.
- 1550 Mao C-A, Li H, Zhang Z, Kiyama T, Panda S, Hattar S, Ribelayga CP, Mills SL, Wang SW  
1551 (2014) T-box transcription regulator Tbr2 is essential for the formation and maintenance of  
1552 Opn4/melanopsin-expressing intrinsically photosensitive retinal ganglion cells. *J Neurosci*  
1553 34:13083–13095.
- 1554 Mao H, Zhao Q, Daigle M, Ghahremani MH, Chidiac P, Albert PR (2004) RGS17/RGS22, a  
1555 novel regulator of Gi/o, Gz, and Gq signaling. *J Biol Chem* 279:26314–26322.
- 1556 Martin S, Lino de Oliveira C, Mello de Queiroz F, Pardo LA, Stühmer W, Del Bel E (2008) Eag1  
1557 potassium channel immunohistochemistry in the CNS of adult rat and selected regions of  
1558 human brain. *Neuroscience* 155:833–844.
- 1559 Matsuoka RL, Nguyen-Ba-Charvet KT, Parray A, Badea TC, Chédotal A, Kolodkin AL (2011)  
1560 Transmembrane semaphorin signalling controls laminar stratification in the mammalian  
1561 retina. *Nature* 470:259–263.



- 1562 Matsushima D, Heavner W, Pevny LH (2011) Combinatorial regulation of optic cup progenitor  
1563 cell fate by SOX2 and PAX6. *Development* 138:443–454.
- 1564 Missler M, Hammer RE, Südhof TC (1998) Neurexophilin binding to alpha-neurexins. A single  
1565 LNS domain functions as an independently folding ligand-binding unit. *J Biol Chem*  
1566 273:34716–34723.
- 1567 Moises HC, Rusin KI, Macdonald RL (1994) Mu- and kappa-opioid receptors selectively reduce  
1568 the same transient components of high-threshold calcium current in rat dorsal root ganglion  
1569 sensory neurons. *J Neurosci* 14:5903–5916.
- 1570 Morrow EM, Belliveau MJ, Cepko CL (1998) Two Phases of Rod Photoreceptor Differentiation  
1571 during Rat Retinal Development. *J Neurosci* 18:3738–3748.
- 1572 Morse AM, Carballo V, Baldwin DA, Taylor CG, McIntyre LM (2010) Comparison between  
1573 NuGEN's WT-Ovation Pico and one-direct amplification systems. *J Biomol Tech* 21:141–  
1574 147.
- 1575 Naiche LA, Harrelson Z, Kelly RG, Papaioannou VE (2005) T-box genes in vertebrate  
1576 development. *Annu Rev Genet* 39:219–239.
- 1577 Novak A, Guo C, Yang W, Nagy A, Lobe CG (2000) Z/EG, a double reporter mouse line that  
1578 expresses enhanced green fluorescent protein upon Cre-mediated excision. *Genesis*.
- 1579 Oancea E, Meyer T (1998) Protein kinase C as a molecular machine for decoding calcium and  
1580 diacylglycerol signals. *Cell* 95:307–318.
- 1581 Pack W, Hill DD, Wong KY (2015) Melatonin modulates M4-type ganglion-cell photoreceptors.  
1582 *Neuroscience* 303:178–188.
- 1583 Pederick DT, Homan CC, Jaehne EJ, Piltz SG, Haines BP, Baune BT, Jolly LA, Hughes JN,  
1584 Gecz J, Thomas PQ (2016) Pcdh19 Loss-of-Function Increases Neuronal Migration In Vitro  
1585 but is Dispensable for Brain Development in Mice. *Sci Rep* 6:26765.
- 1586 Peirson SN, Oster H, Jones SL, Leitges M, Hankins MW, Foster RG (2007) Microarray Analysis  
1587 and Functional Genomics Identify Novel Components of Melanopsin Signaling. *Current*  
1588 *Biology* 17:1363–1372.
- 1589 Pettem KL, Yokomaku D, Takahashi H, Ge Y, Craig AM (2013) Interaction between autism-  
1590 linked MDGAs and neuroligins suppresses inhibitory synapse development. *J Cell Biol*  
1591 200:321–336.
- 1592 Pierret P, Dunn RJ, Djordjevic B, Stone JC, Richardson PM (2000) Distribution of ras guanyl  
1593 releasing protein (RasGRP) mRNA in the adult rat central nervous system. *J Neurocytol*  
1594 29:485–497.
- 1595 Pocock R, Mione M, Hussain S, Maxwell S, Pontecorvi M, Aslam S, Gerrelli D, Sowden JC,  
1596 Woollard A (2008) Neuronal function of Tbx20 conserved from nematodes to vertebrates.  
1597 *Developmental Biology* 317:671–685.

- 1598 Puente LG, Stone JC, Ostergaard HL (2000) Evidence for protein kinase C-dependent and -  
1599 independent activation of mitogen-activated protein kinase in T cells: potential role of  
1600 additional diacylglycerol binding proteins. *The Journal of Immunology* 165:6865–6871.
- 1601 Quail MA, Kozarewa I, Smith F, Scally A, Stephens PJ, Durbin R, Swerdlow H, Turner DJ  
1602 (2008) A large genome center's improvements to the Illumina sequencing system. *Nat*  
1603 *Methods* 5:1005–1010.
- 1604 Quattrochi LE, Stabio ME, Kim I, Berson DM (2018) The M6 cell: A small-field bistratified  
1605 photosensitive ganglion cell. in press.
- 1606 Reifler AN, Chervenak AP, Dolikian ME, Benenati BA, Li BY, Wachter RD, Lynch AM,  
1607 Demertzis ZD, Meyers BS, Abufarha FS, Jaeckel ER, Flannery MP, Wong KY (2015) All  
1608 Spiking, Sustained ON Displaced Amacrine Cells Receive Gap-Junction Input from  
1609 Melanopsin Ganglion Cells. *Current Biology* 25:2763–2773.
- 1610 Renna JM, Weng S, Berson DM (2011) Light acts through melanopsin to alter retinal waves and  
1611 segregation of retinogeniculate afferents. *Nature Neuroscience* 14:827–829.
- 1612 Rodriguez AR, Sevilla Müller LP, Brecha NC (2014) The RNA binding protein RBPMS is a  
1613 selective marker of ganglion cells in the mammalian retina. *Journal of Comparative*  
1614 *Neurology* 522:1411–1443.
- 1615 Rouso DL, Qiao M, Kagan RD, Yamagata M, Palmiter RD, Sanes JR (2016) Two Pairs of ON  
1616 and OFF Retinal Ganglion Cells Are Defined by Intersectional Patterns of Transcription  
1617 Factor Expression. *Cell Rep* 15:1930–1944.
- 1618 Sabbah S, Berg D, Papendorp C, Briggman KL, Berson DM (2017) A Cre Mouse Line for  
1619 Probing Irradiance- and Direction-Encoding Retinal Networks. *eNeuro* 4:ENEURO.0065–  
1620 17.2017.
- 1621 Sakabe NJ, Aneas I, Shen T, Shokri L, Park S-Y, Bulyk ML, Evans SM, Nobrega MA (2012)  
1622 Dual transcriptional activator and repressor roles of TBX20 regulate adult cardiac structure  
1623 and function. *Hum Mol Genet* 21:2194–2204.
- 1624 Sand A, Schmidt TM, Kofuji P (2012) Diverse types of ganglion cell photoreceptors in the  
1625 mammalian retina. *Progress in Retinal and Eye Research* 31:287–302.
- 1626 Sanes JR, Masland RH (2015) The Types of Retinal Ganglion Cells: Current Status and  
1627 Implications for Neuronal Classification. [http://dxdoi.org/101146/annurev-neuro-071714-](http://dxdoi.org/101146/annurev-neuro-071714-034120)  
1628 [034120](http://dxdoi.org/101146/annurev-neuro-071714-034120) 38:221–246.
- 1629 Schmidt TM, Do MTH, Dacey D, Lucas R, Hattar S, Matynia A (2011) Melanopsin-positive  
1630 intrinsically photosensitive retinal ganglion cells: from form to function. *J Neurosci*  
1631 31:16094–16101.
- 1632 Schmidt TM, Taniguchi K, Kofuji P (2008) Intrinsic and Extrinsic Light Responses in  
1633 Melanopsin-Expressing Ganglion Cells During Mouse Development. *Journal of*  
1634 *Neurophysiology* 100:371–384.

- 1635 Sengupta A, Baba K, Mazzoni F, Pozdeyev NV, Strettoi E, Iuvone PM, Tosini G (2011)  
1636 Localization of melatonin receptor 1 in mouse retina and its role in the circadian regulation  
1637 of the electroretinogram and dopamine levels. Yamazaki S, ed. PLoS ONE 6:e24483.
- 1638 Shekhar K, Lapan SW, Whitney IE, Tran NM, Macosko EZ, Kowalczyk M, Adiconis X, Levin JZ,  
1639 Nemesh J, Goldman M, McCarroll SA, Cepko CL, Regev A, Sanes JR (2016)  
1640 Comprehensive Classification of Retinal Bipolar Neurons by Single-Cell Transcriptomics.  
1641 Cell 166:1308–1323.e1330.
- 1642 Shen T, Aneas I, Sakabe N, Dirschinger RJ, Wang G, Smemo S, Westlund JM, Cheng H,  
1643 Dalton N, Gu Y, Boogerd CJ, Cai C-L, Peterson K, Chen J, Nobrega MA, Evans SM (2011)  
1644 Tbx20 regulates a genetic program essential to adult mouse cardiomyocyte function. J Clin  
1645 Invest 121:4640–4654.
- 1646 Sheng W-L, Chen W-Y, Yang X-L, Zhong Y-M, Weng S-J (2015) Co-expression of two subtypes  
1647 of melatonin receptor on rat M1-type intrinsically photosensitive retinal ganglion cells.  
1648 Barnes S, ed. PLoS ONE 10:e0117967.
- 1649 Shulga YV, Topham MK, Epand RM (2011) Regulation and Functions of Diacylglycerol Kinases.  
1650 Chemical Reviews 111:6186–6208.
- 1651 Siegert S, Cabuy E, Scherf BG, Kohler H, Panda S, Le Y-Z, Fehling HJ, Gaidatzis D, Stadler  
1652 MB, Roska B (2012) Transcriptional code and disease map for adult retinal cell types.  
1653 Nature Neuroscience 15:487–495.
- 1654 Soto I, Oglesby E, Buckingham BP, Son JL, Roberson EDO, Steele MR, Inman DM, Vetter ML,  
1655 Horner PJ, Marsh-Armstrong N (2008) Retinal Ganglion Cells Downregulate Gene  
1656 Expression and Lose Their Axons within the Optic Nerve Head in a Mouse Glaucoma  
1657 Model. J Neurosci 28:548–561.
- 1658 Stabio ME, Sabbah S, Quattrochi LE, Ilardi MC, Fogerson PM, Leyrer ML, Kim MT, Kim I, Schiel  
1659 M, Renna JM, Briggman KL, Berson DM (2018) The M5 Cell: A Color-Opponent Intrinsically  
1660 Photosensitive Retinal Ganglion Cell. Neuron 97:251.
- 1661 Star EN, Zhu M, Shi Z, Liu H, Pashmforoush M, Sauve Y, Bruneau BG, Chow RL (2012)  
1662 Regulation of retinal interneuron subtype identity by the Iroquois homeobox gene *lrx6*.  
1663 Development 139:4644–4655.
- 1664 Stennard FA, Costa MW, Elliott DA, Rankin S, Haast SJP, Lai D, McDonald LPA, Niederreither  
1665 K, Dolle P, Bruneau BG, Zorn AM, Harvey RP (2003) Cardiac T-box factor Tbx20 directly  
1666 interacts with Nkx2-5, GATA4, and GATA5 in regulation of gene expression in the  
1667 developing heart. Developmental Biology 262:206–224.
- 1668 Sweeney NT, Tierney H, Feldheim DA (2014) *Tbr2* is required to generate a neural circuit  
1669 mediating the pupillary light reflex. J Neurosci 34:5447–5453.
- 1670 Takeuchi JK, Mileikovskaia M, Koshiba-Takeuchi K, Heidt AB, Mori AD, Arruda EP,  
1671 Gertsenstein M, Georges R, Davidson L, Mo R, Hui C-C, Henkelman RM, Nemer M, Black  
1672 BL, Nagy A, Bruneau BG (2005) Tbx20 dose-dependently regulates transcription factor  
1673 networks required for mouse heart and motoneuron development. Development 132:2463–  
1674 2474.

- 1675 Tariq MA, Kim HJ, Jejelowo O, Pourmand N (2011) Whole-transcriptome RNAseq analysis from  
1676 minute amount of total RNA. *Nucleic Acids Res* 39:e120–e120.
- 1677 Thorvaldsdóttir H, Robinson JT (2013) Integrative Genomics Viewer (IGV): high-performance  
1678 genomics data visualization and exploration. *Briefings in ....*
- 1679 Toki S, Kawasaki H, Tashiro N, Housman DE, Graybiel AM (2001) Guanine nucleotide  
1680 exchange factors CalDAG-GEFI and CalDAG-GEFII are colocalized in striatal projection  
1681 neurons. *J Comp Neurol* 437:398–407.
- 1682 Topark-Ngarm A, Golonzhka O, Peterson VJ, Barrett B, Martinez B, Crofoot K, Filtz TM, Leid M  
1683 (2006) CTIP2 associates with the NuRD complex on the promoter of p57KIP2, a newly  
1684 identified CTIP2 target gene. *J Biol Chem* 281:32272–32283.
- 1685 Topham MK, Prescott SM (2001) Diacylglycerol kinase zeta regulates Ras activation by a novel  
1686 mechanism. *J Cell Biol* 152:1135–1143.
- 1687 Trapnell C, Roberts A, Goff L, Pertea G, Kim D, Kelley DR, Pimentel H, Salzberg SL, Rinn JL,  
1688 Pachter L (2012) Differential gene and transcript expression analysis of RNA-seq  
1689 experiments with TopHat and Cufflinks. *Nature Protocols* 7:562–578.
- 1690 Van Hook MJ, Wong KY, Berson DM (2012) Dopaminergic modulation of ganglion-cell  
1691 photoreceptors in rat. *European Journal of Neuroscience* 35:507–518.
- 1692 Wong KY (2012) A retinal ganglion cell that can signal irradiance continuously for 10 hours. *J*  
1693 *Neurosci* 32:11478–11485.
- 1694 Xu J, Xiao N, Xia J (2010) Thrombospondin 1 accelerates synaptogenesis in hippocampal  
1695 neurons through neuroligin 1. *Nature Neuroscience* 13:22–24.
- 1696 Xue T, Do MTH, Riccio A, Jiang Z, Hsieh J, Wang HC, Merbs SL, Welsbie DS, Yoshioka T,  
1697 Weissgerber P, Stolz S, Flockerzi V, Freichel M, Simon MI, Clapham DE, Yau KW (2011)  
1698 Melanopsin signalling in mammalian iris and retina. *Nature* 479:67–73.
- 1699 Young RW (1985) Cell differentiation in the retina of the mouse. *The Anatomical Record*  
1700 212:199–205.
- 1701 Zhang M, Xia H, Li X, Wang X, Dong Y, Zhang T, Yu H (2010) C1 domain mediates CalDAGIII  
1702 localization to the Golgi. *Mol Biol Rep* 37:3481–3485.
- 1703 Zhou H, Yoshioka T, Nathans J (1996) Retina-derived POU-domain factor-1: a complex POU-  
1704 domain gene implicated in the development of retinal ganglion and amacrine cells. *J*  
1705 *Neurosci* 16:2261–2274.
- 1706

**Figure 1.**

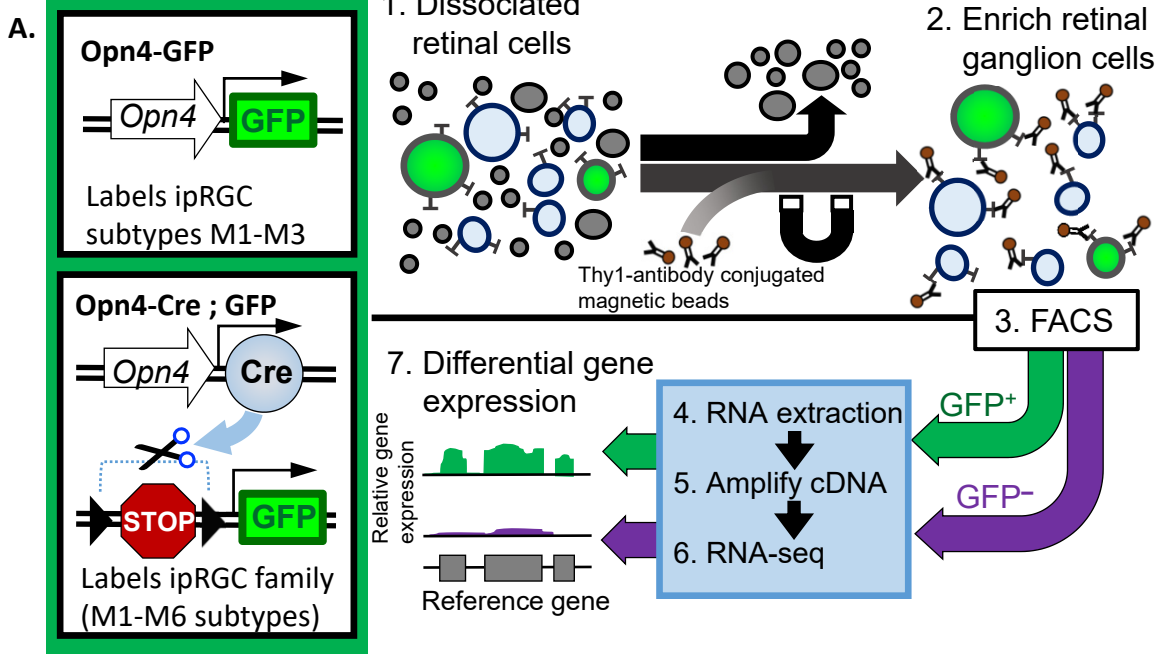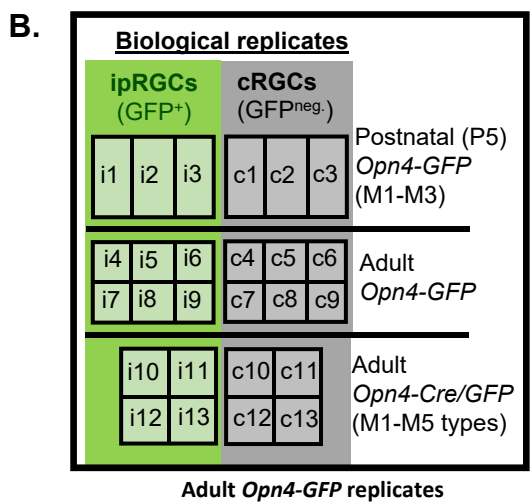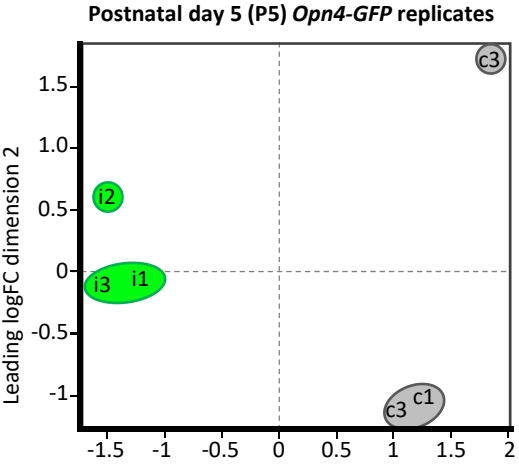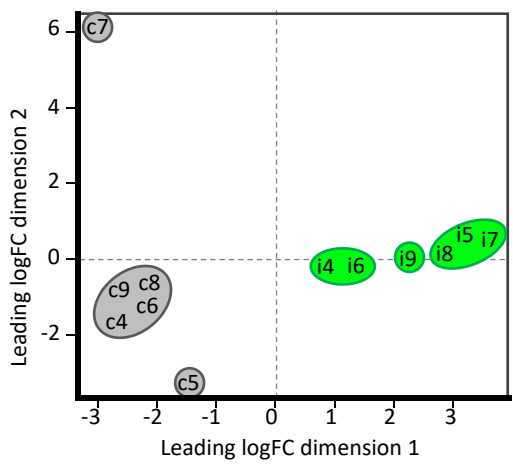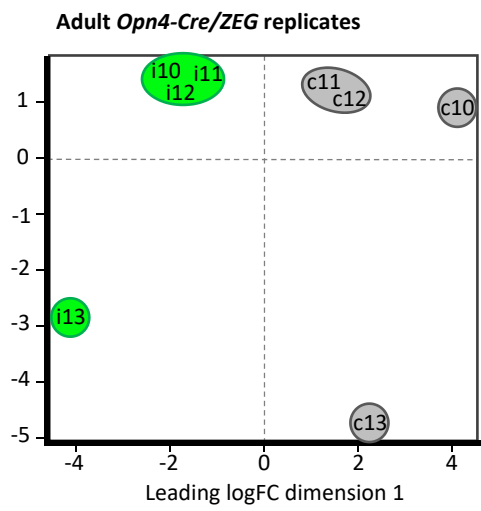

**Figure 1—figure supplement 1.**

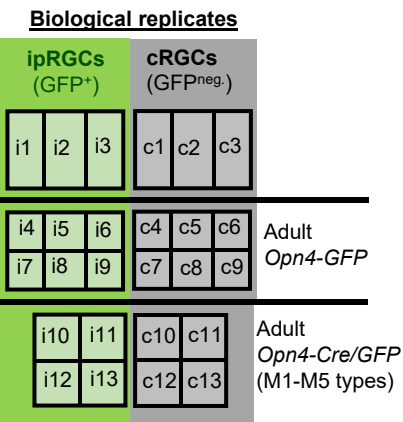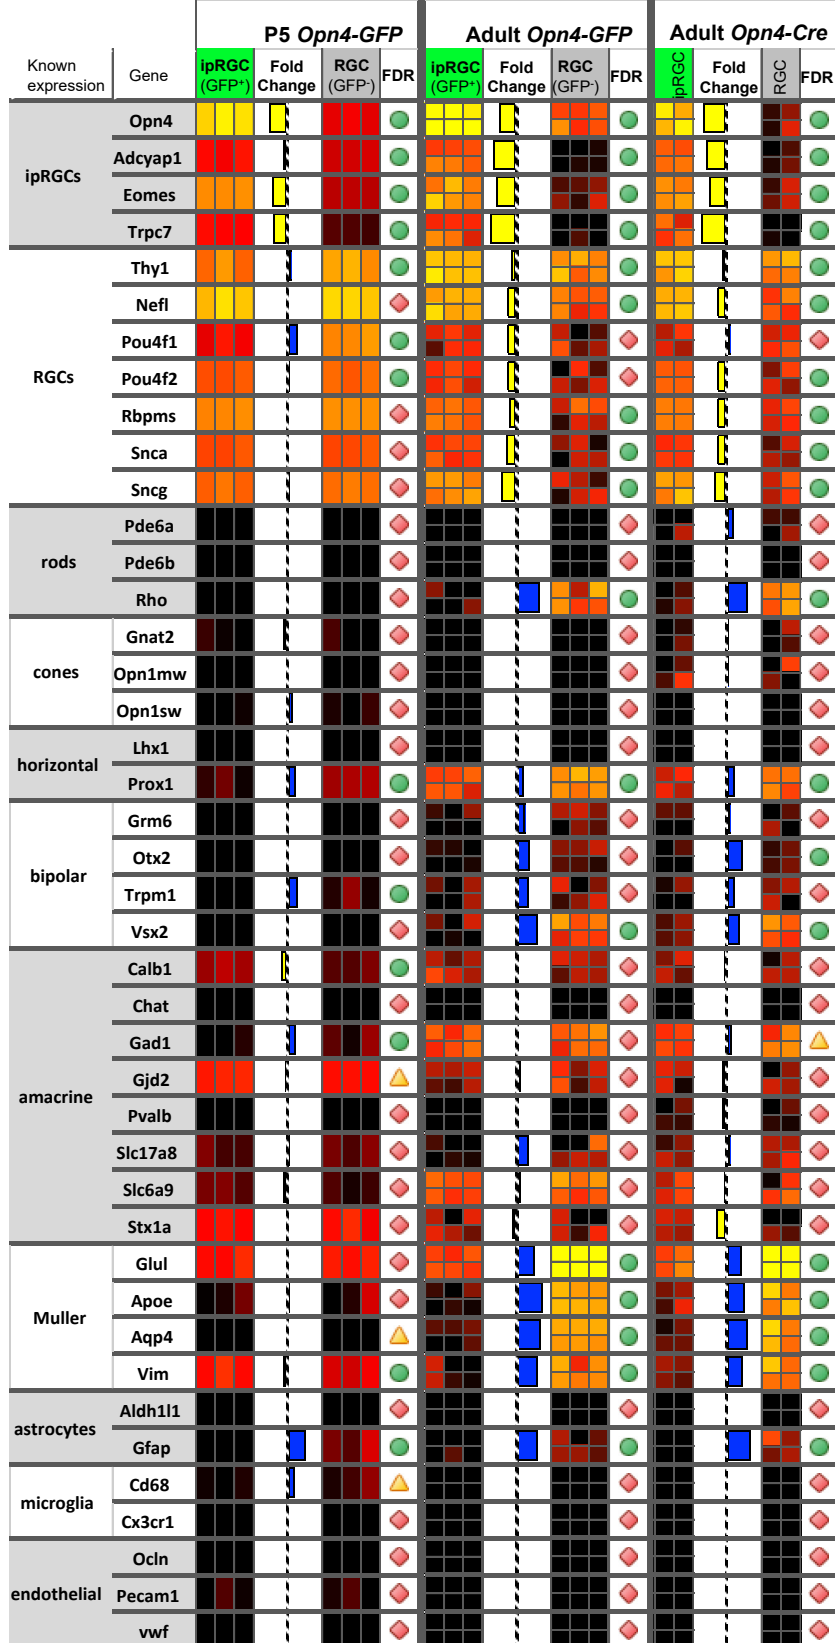

Counts per million (CPM)

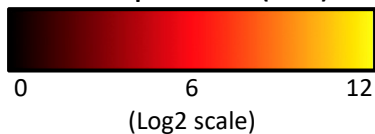

Fold Change

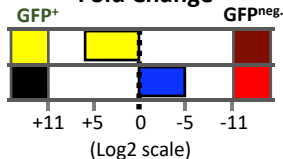

False Discovery Rate (FDR)

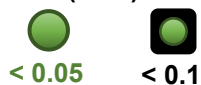

# Figure 2.

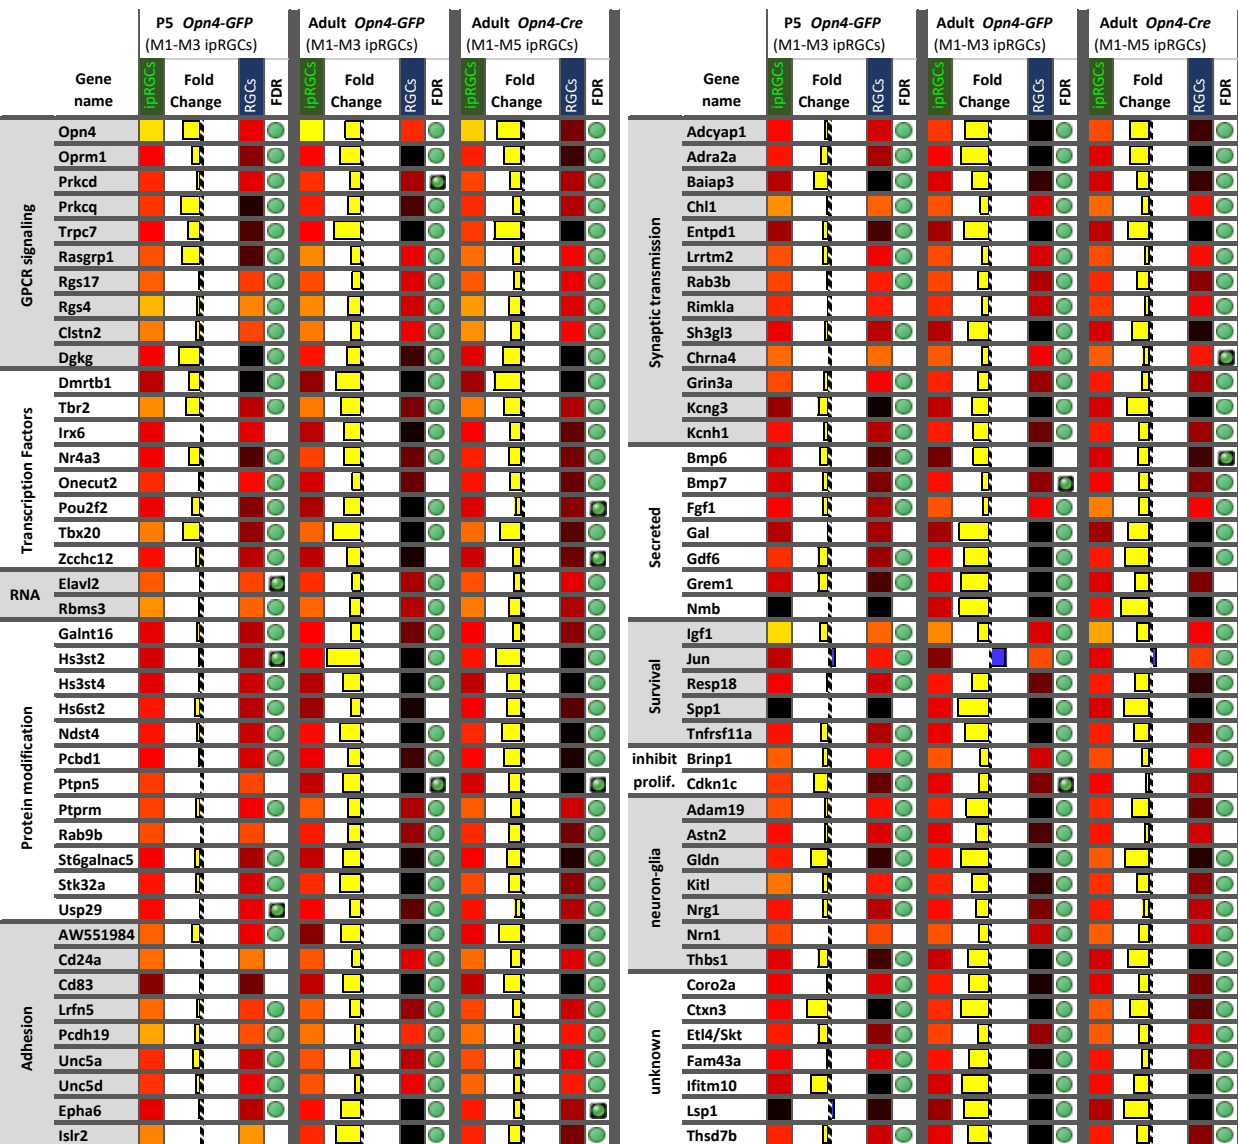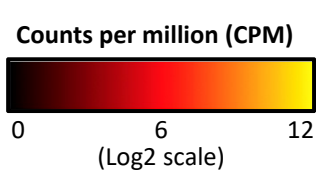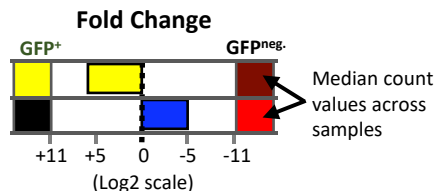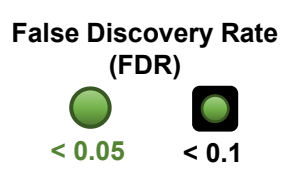

**Figure 2—figure supplement 1.**

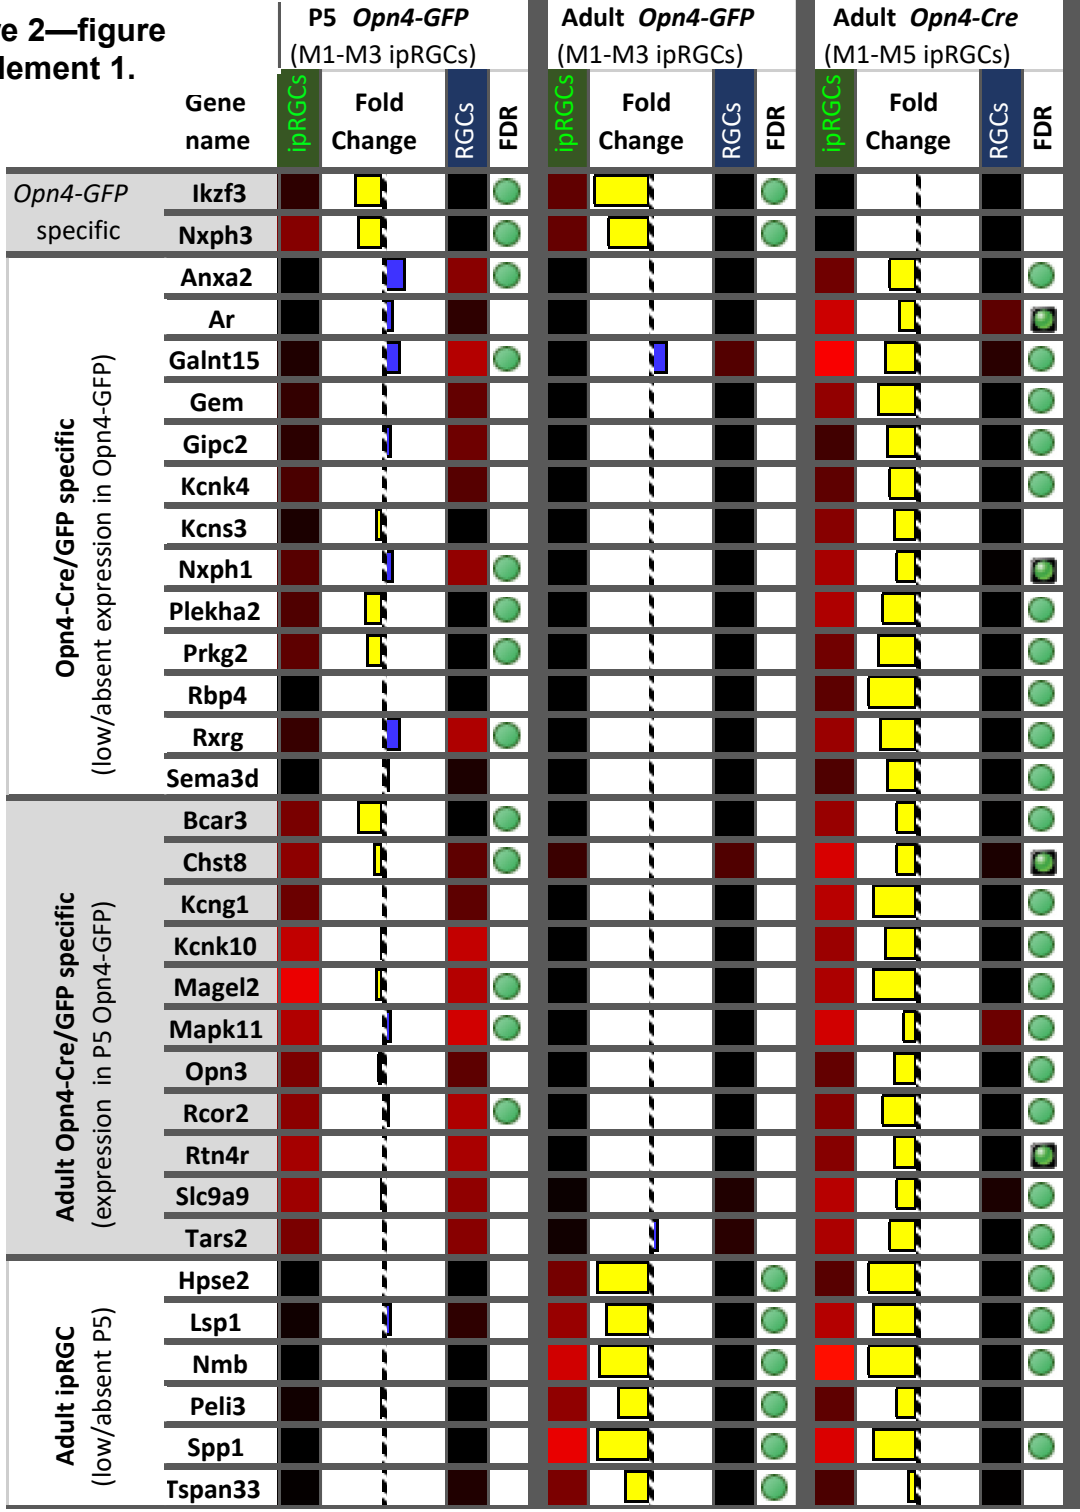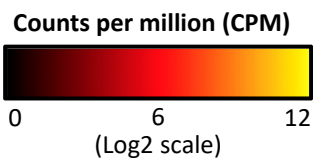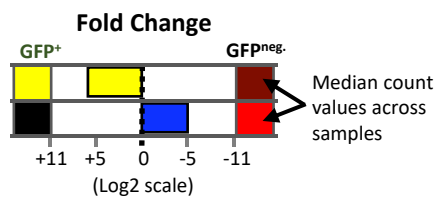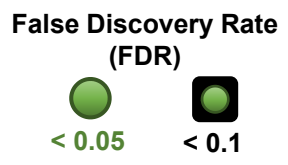



**Figure 2—figure supplement 2.**

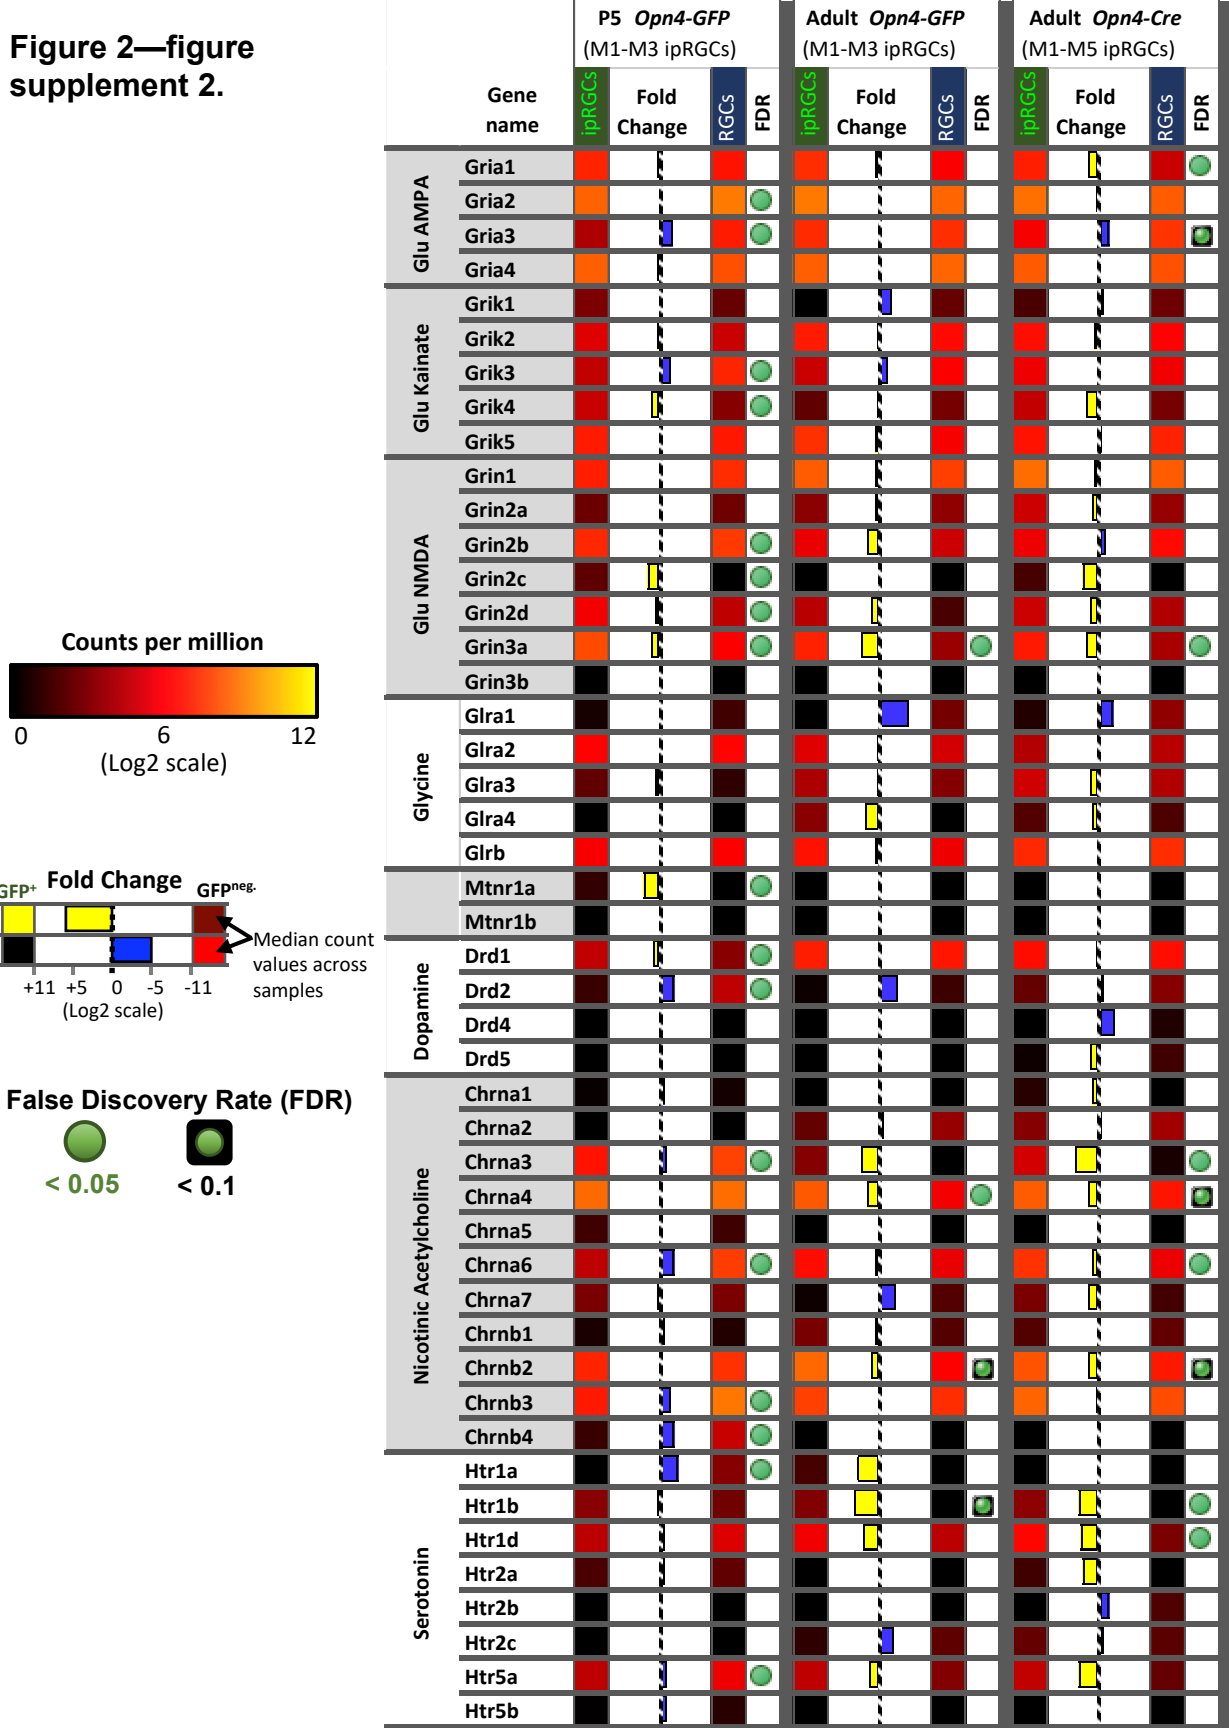

**Figure 2—figure supplement 3**

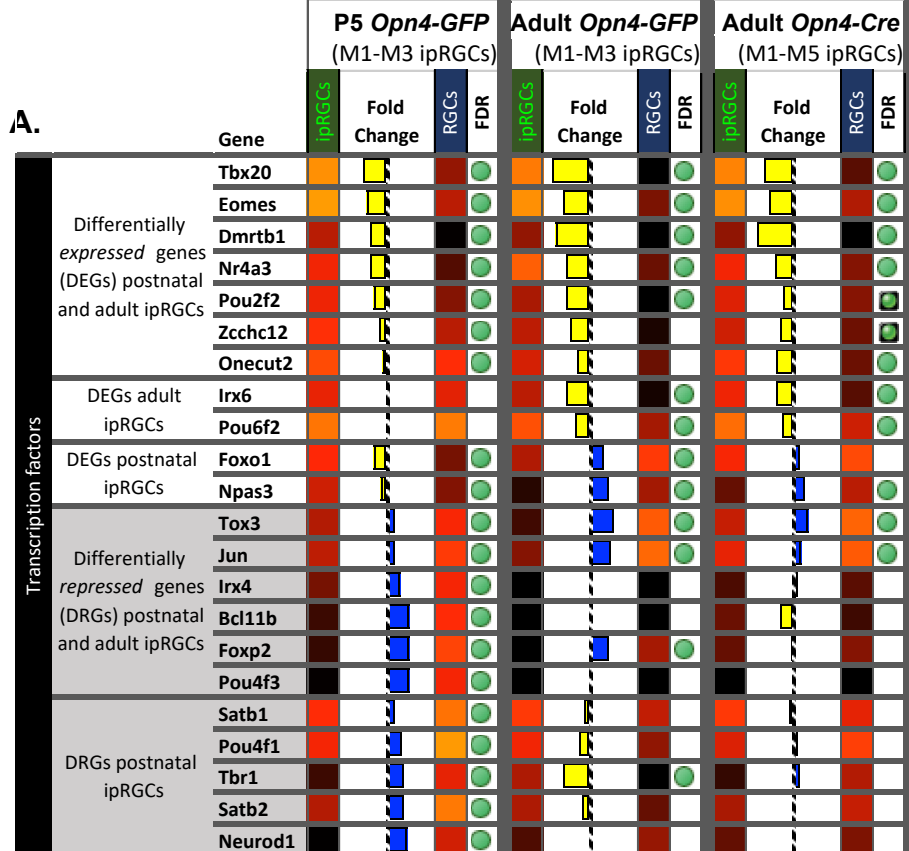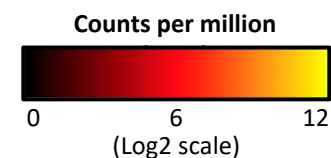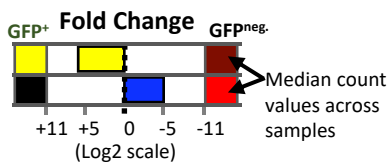

False Discovery Rate (FDR)

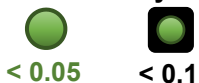

**B.**

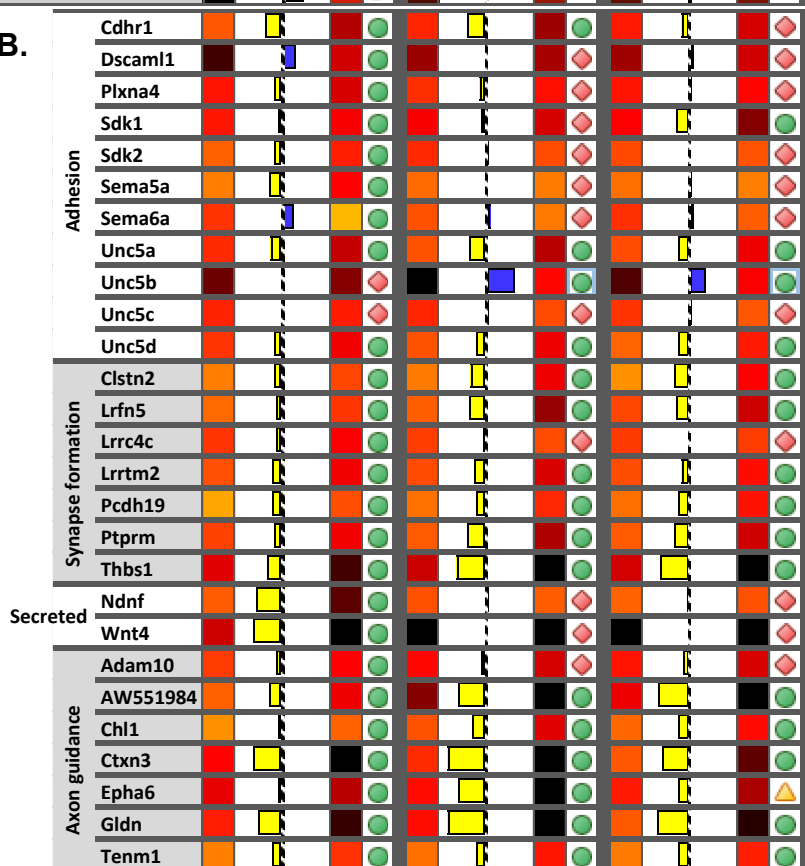



**Figure 3.**

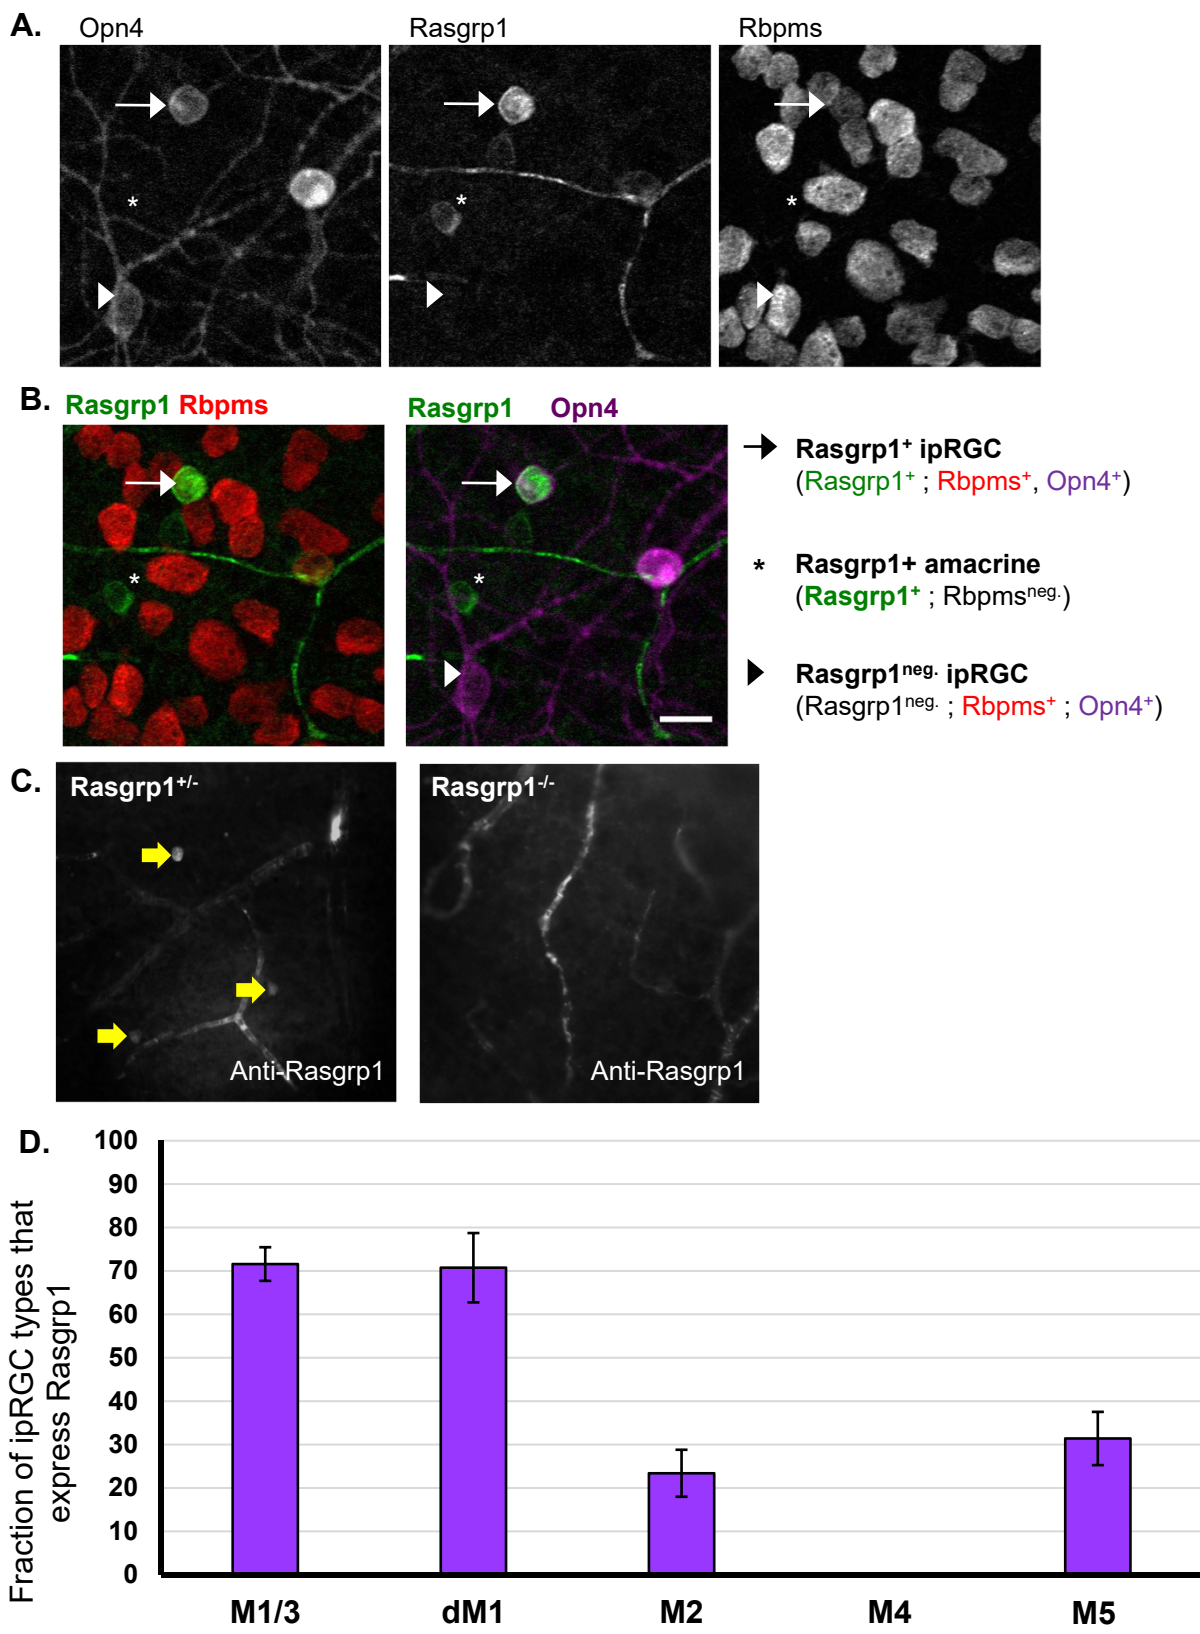

**Figure 3—figure supplement 1.**

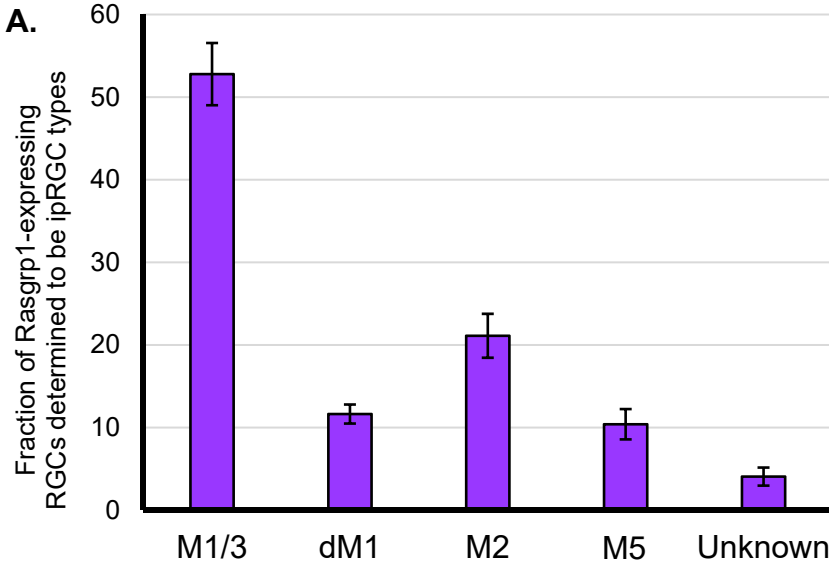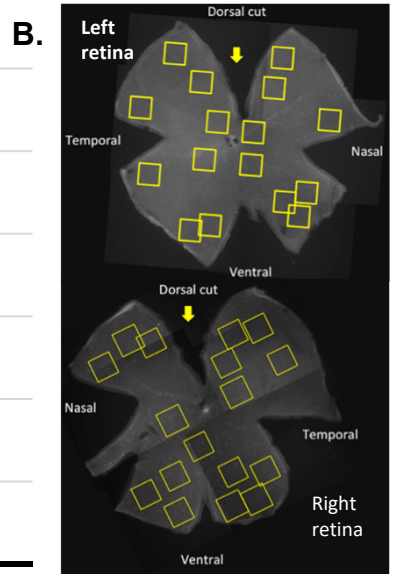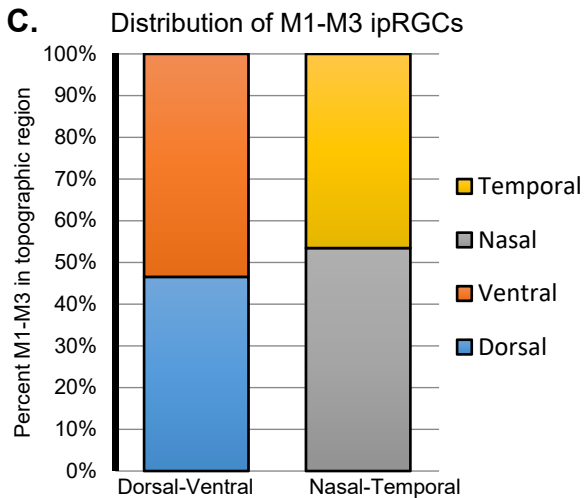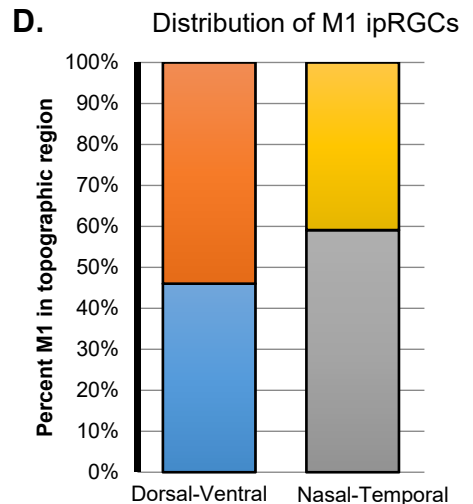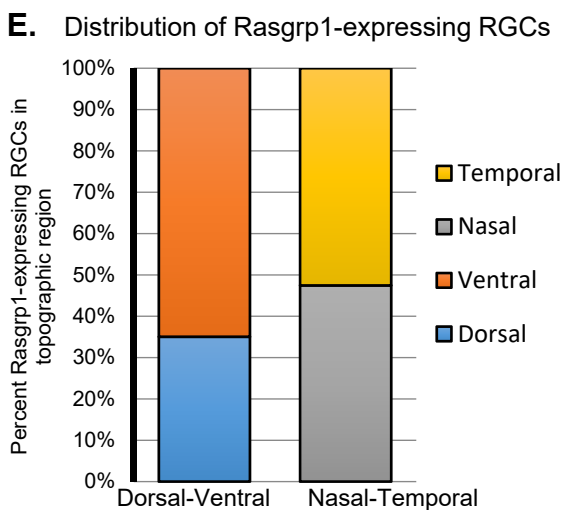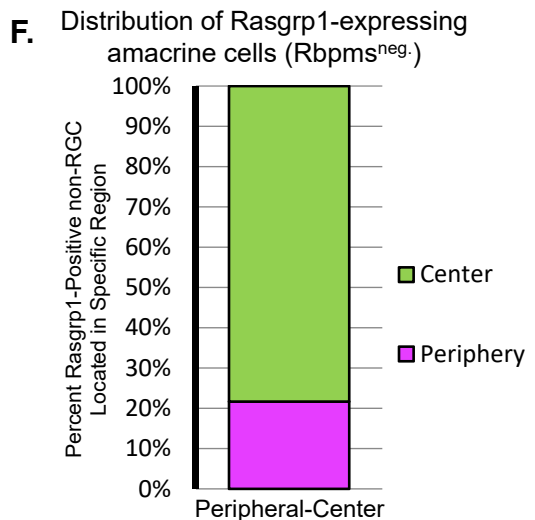

**Figure 4.**

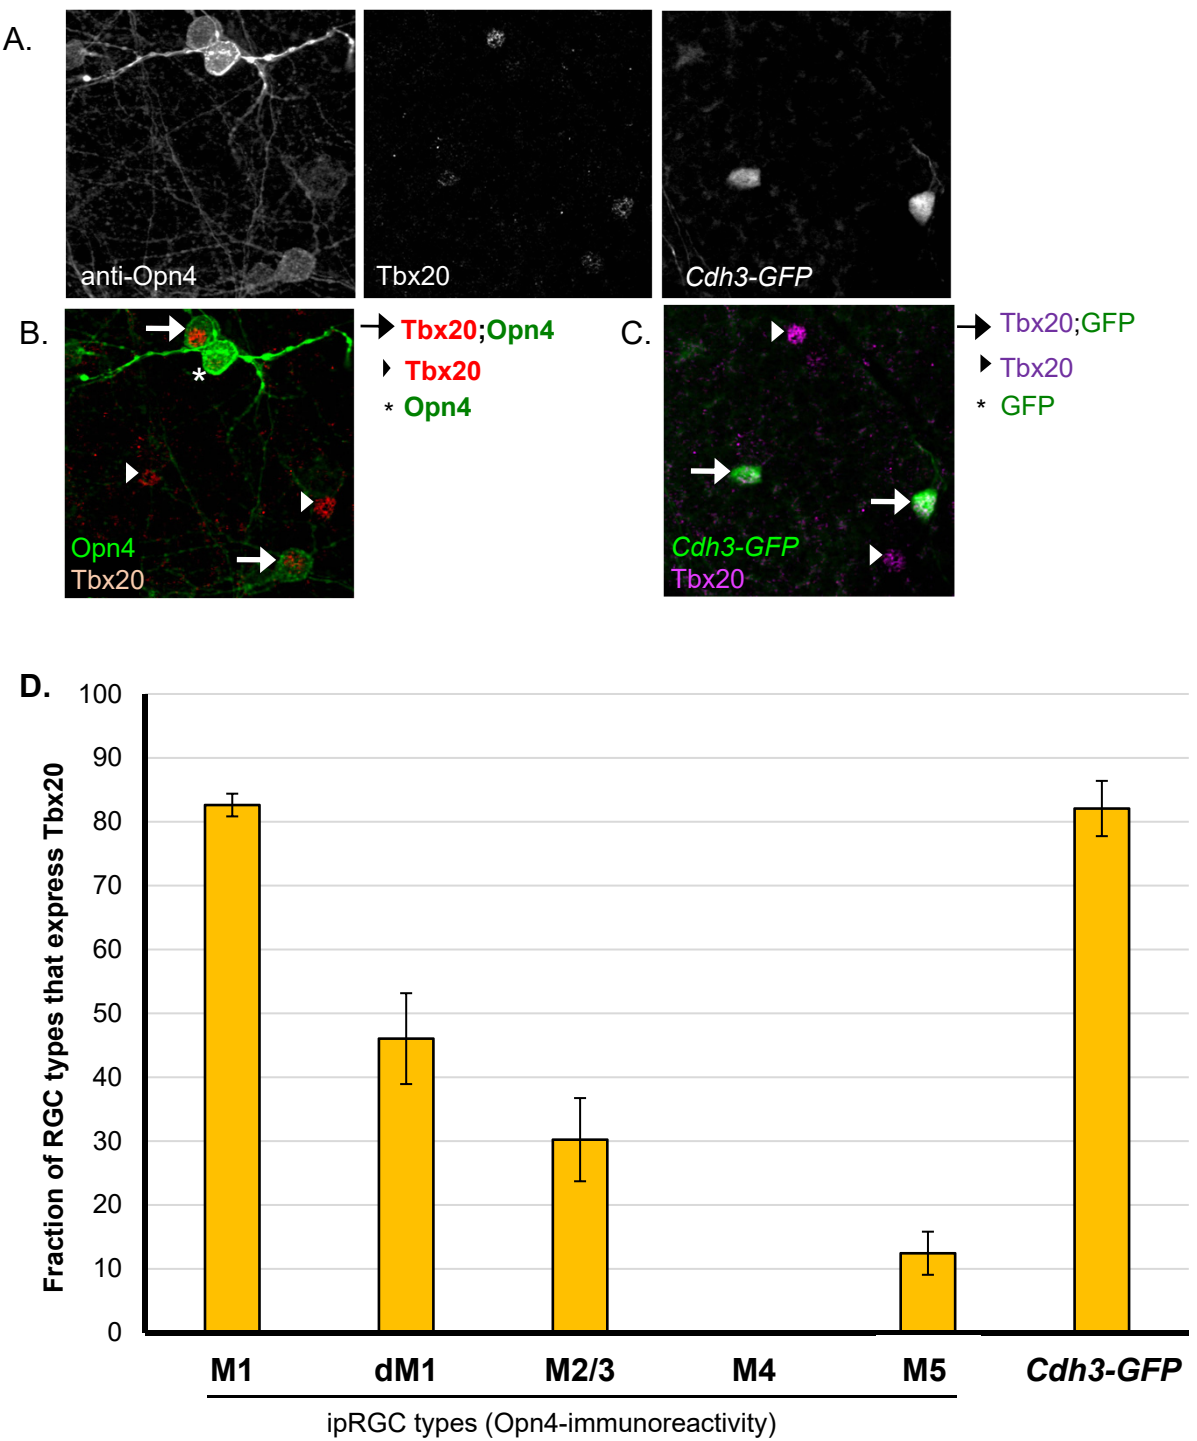

**Figure 4—figure supplement 1.**

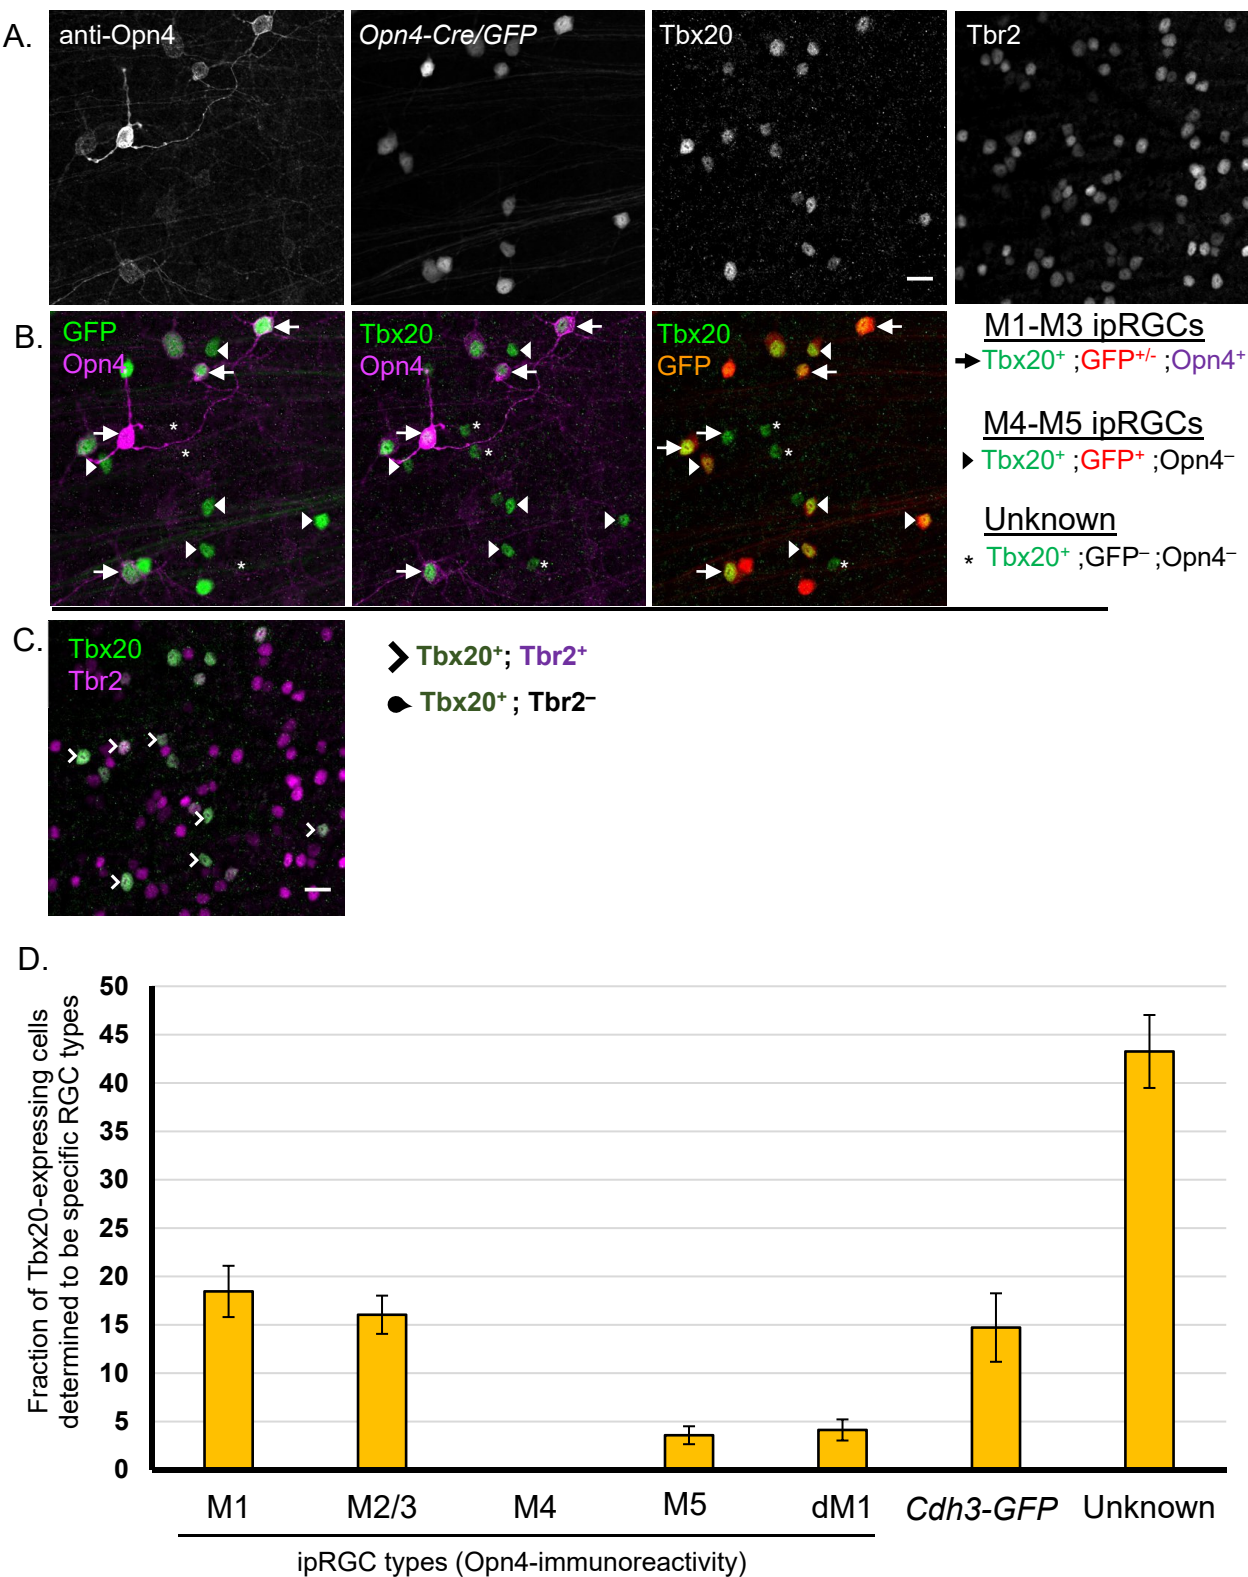

**Figure 5. A.**

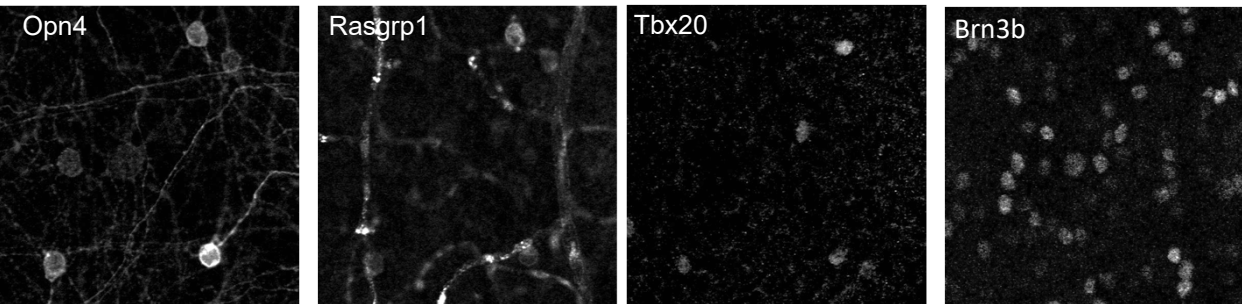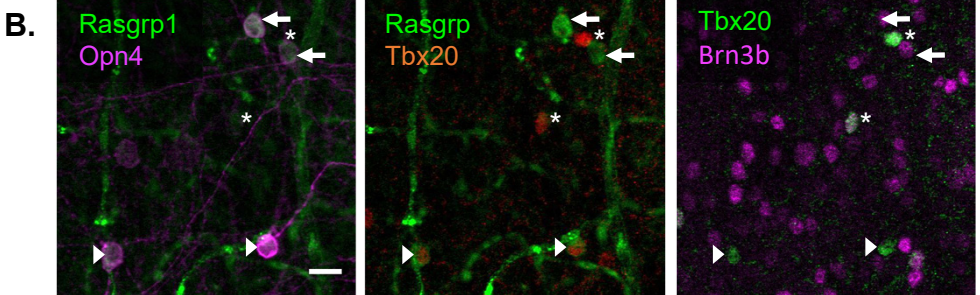

- ➔ Opn4<sup>+</sup> ; Rasgrp1<sup>+</sup> ; Tbx20<sup>-</sup> ; Brn3b<sup>-</sup>
- ▶ Opn4<sup>+</sup> ; Rasgrp1<sup>+</sup> ; Tbx20<sup>+</sup> ; Brn3b<sup>-</sup>
- \* Opn4<sup>-</sup> ; Rasgrp1<sup>-</sup> ; Tbx20<sup>+</sup> ; Brn3b<sup>+</sup>

**C.**

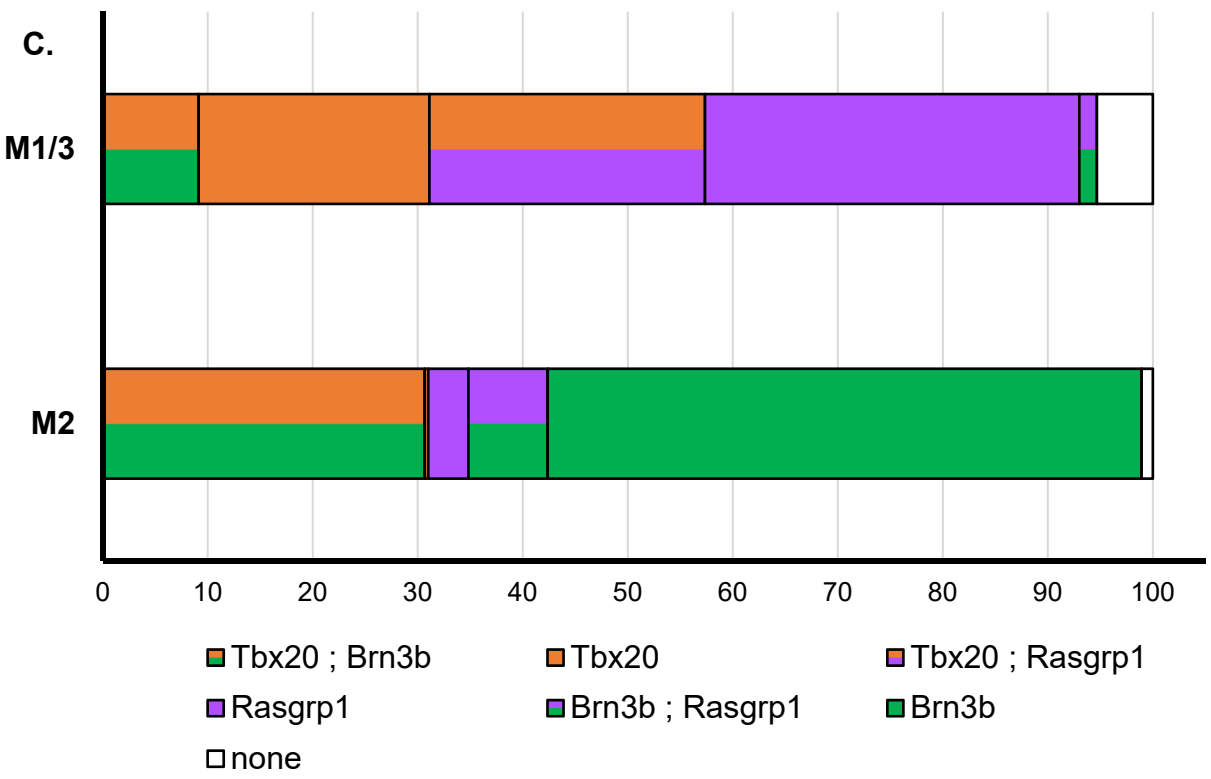



**Figure 5—figure supplement 1.**

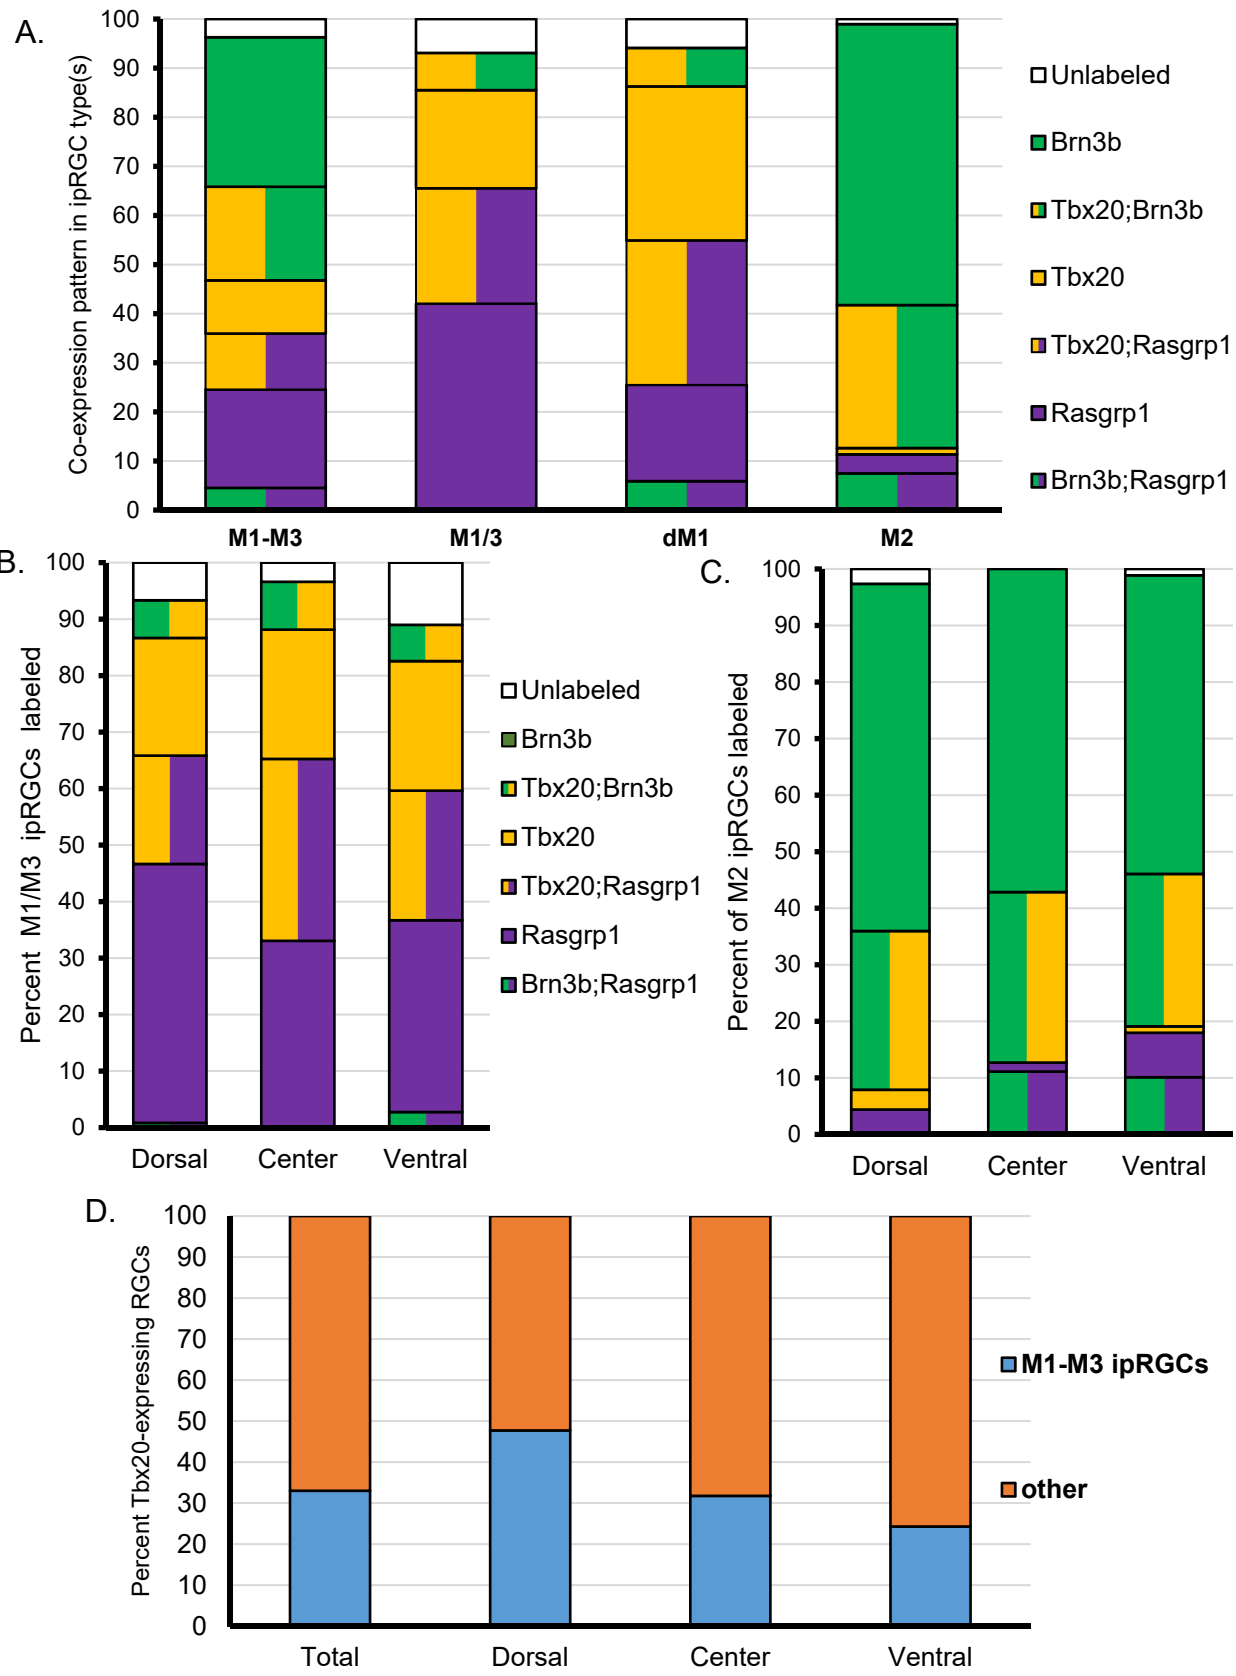

Figure 6.

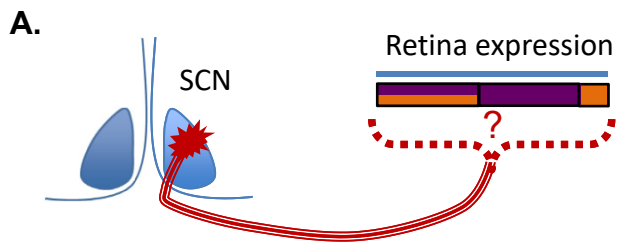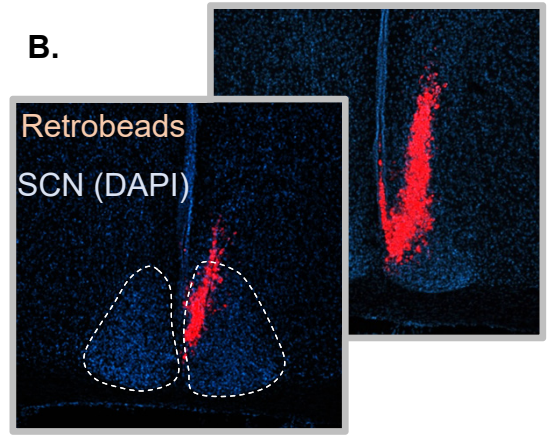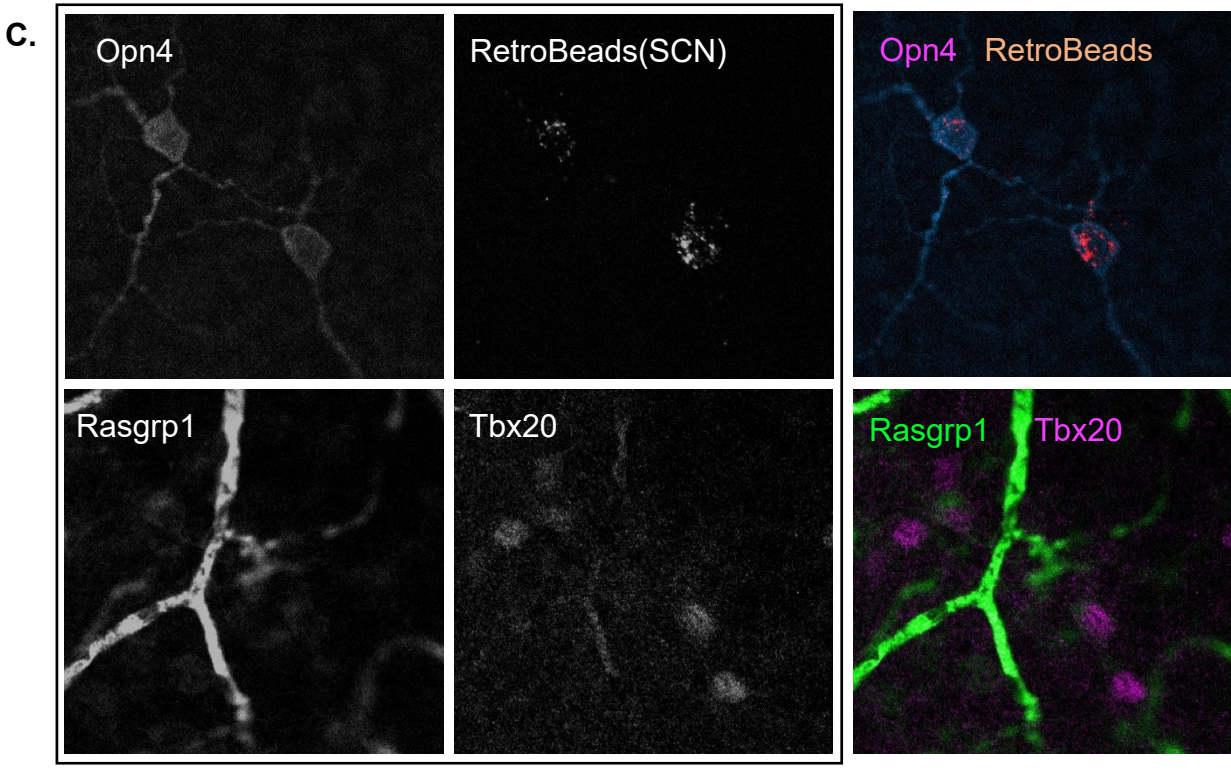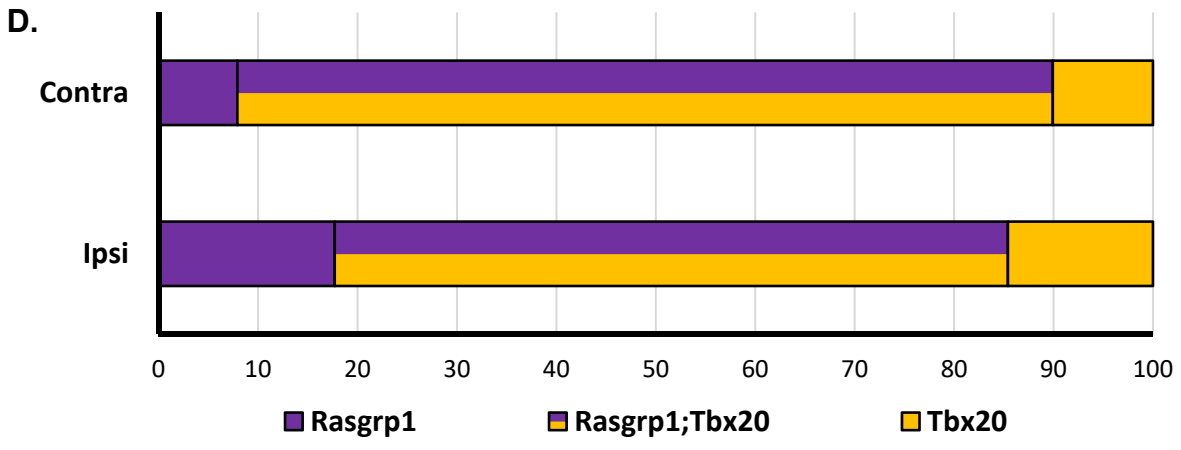

**Figure 7.**

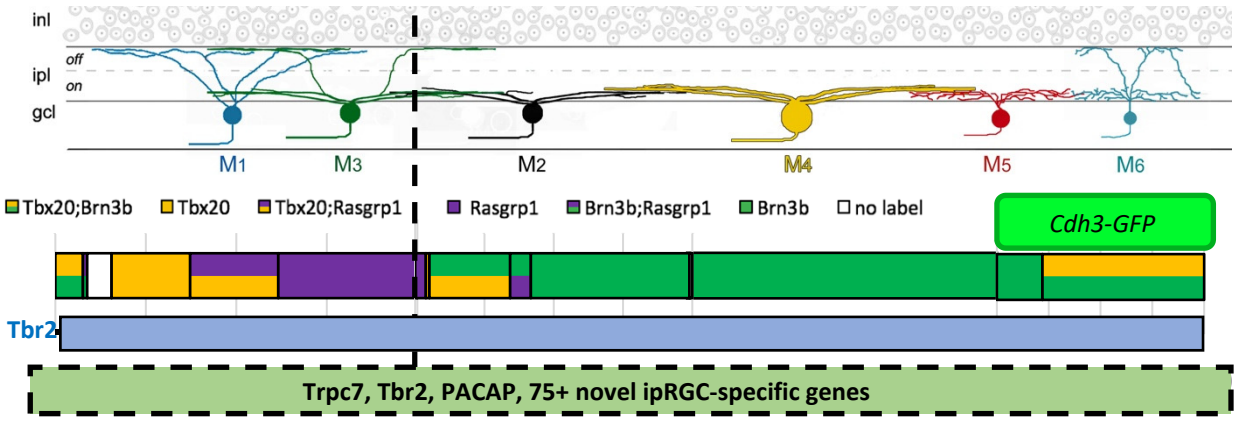

|                                          |                                         |
|------------------------------------------|-----------------------------------------|
| <b>Circadian rhythm photoentrainment</b> |                                         |
| <b>Morphology</b>                        | Mostly M1, rare M2                      |
| <b>Molecular</b>                         | Brn3b <sup>-</sup><br>Rasgrp1 +/- Tbx20 |
| <b>Brain targets</b>                     | SCN                                     |

**Figure 8. A.**

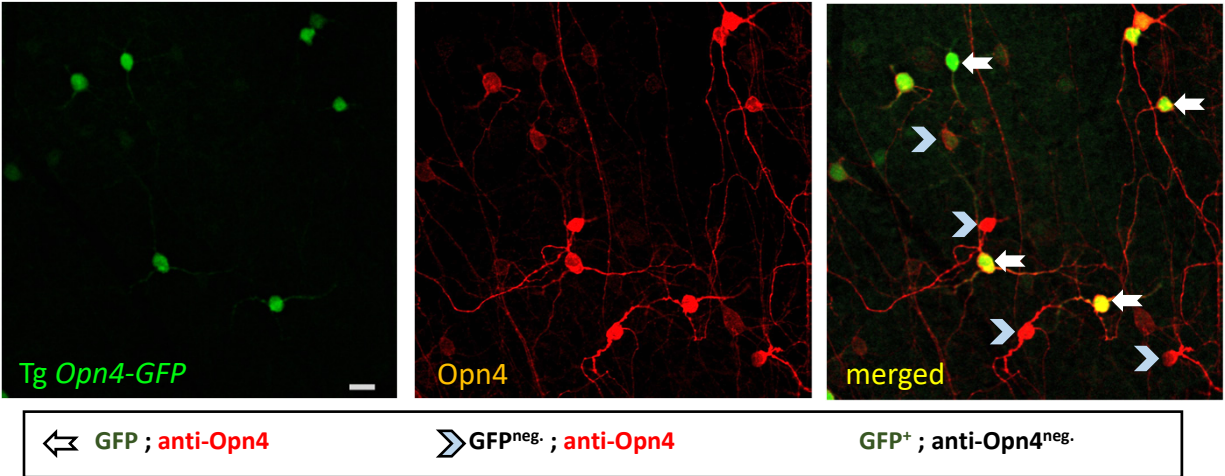

**B.**

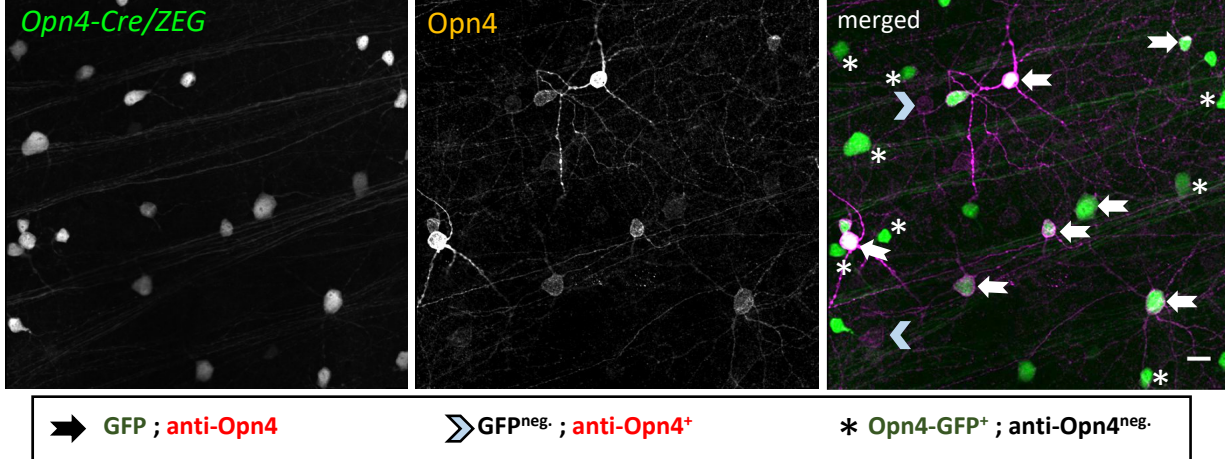

**C.**

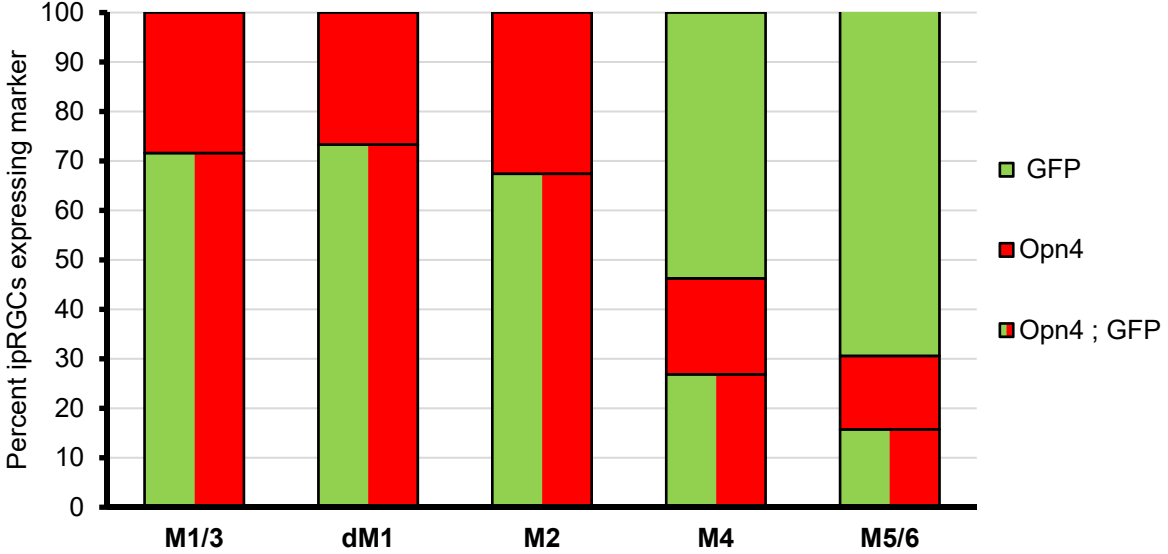

**Figure 9.**

**A. Sample sort *Opn4::GFP* – Age P4**

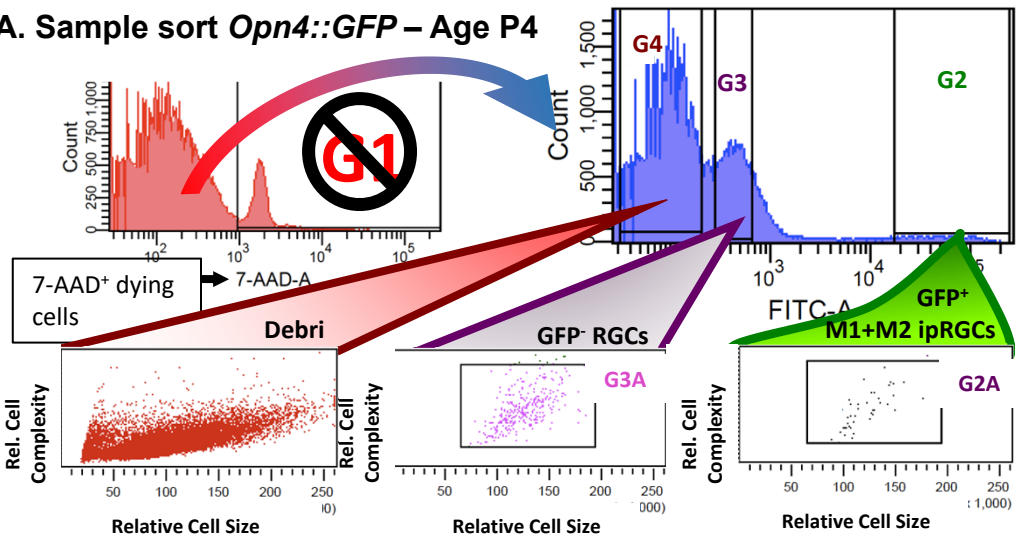

**B. Flow cytometry gating**

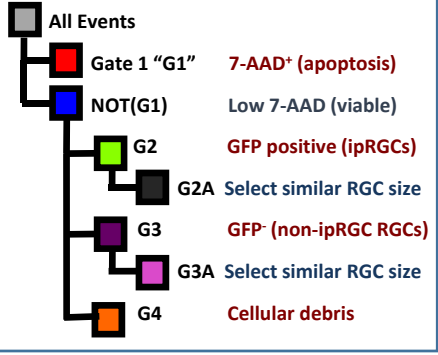

**C. Sample sort Adult *Opn4::GFP* (M1-M3 ipRGCs)**

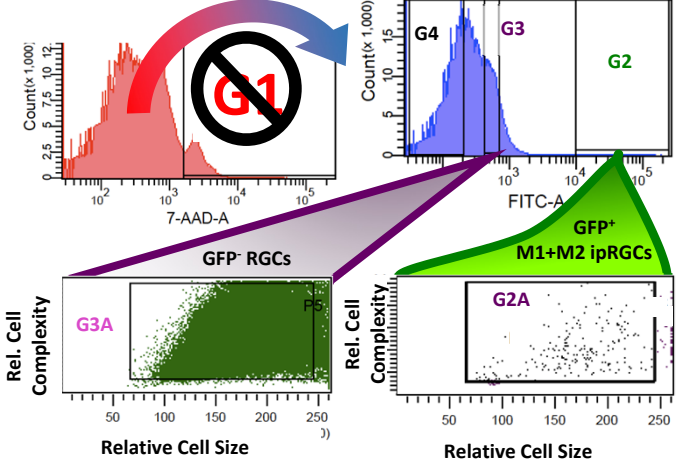

**D. Testing isolated cells from sorted *Opn4::Cre GFP* reporter (P4)**

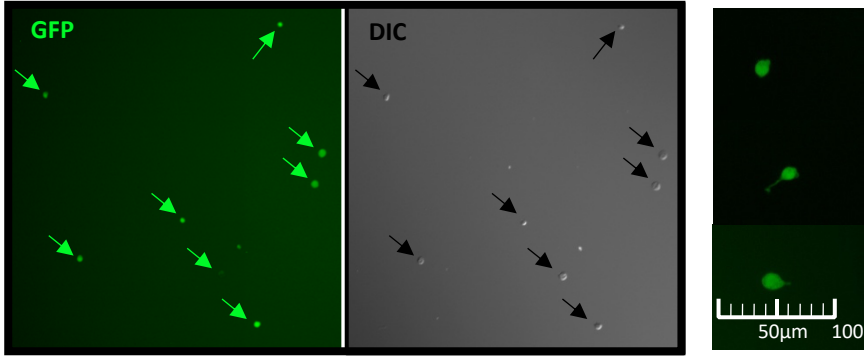

Figure 10.

### A. RNA extraction and quality test for degradation

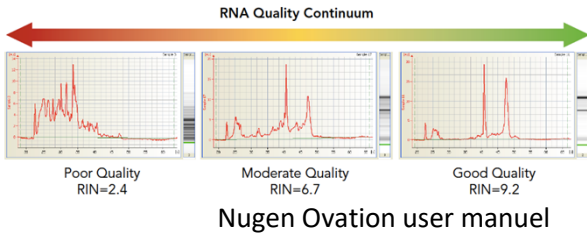

### Total RNA of P4 *Opn4::GFP* - high Quality RNA

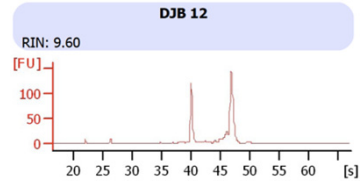

### B. cDNA processing of extracted RNA

Total RNA input

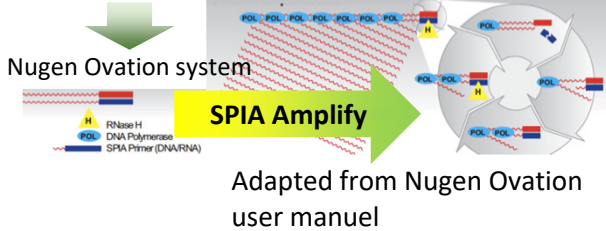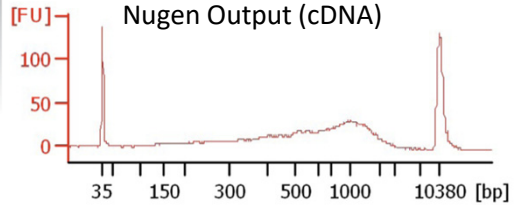

### C. RNA-seq library preparation (Truseq)

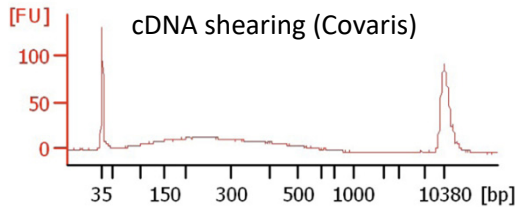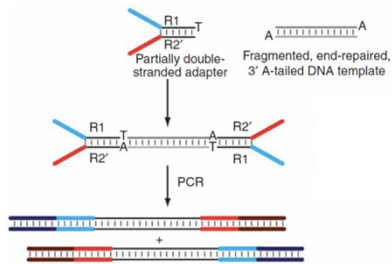

### D. Test concentration and adapter length (qPCR & Bioanalyzer)

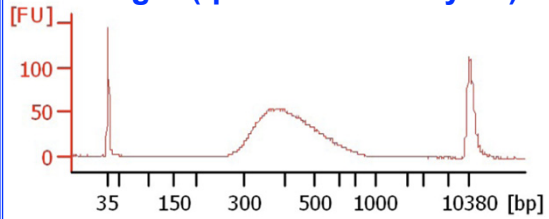

### E. Multiplexed Illumina sequencing

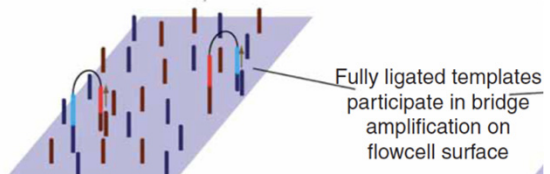

### F. *Opn4-GFP* (M1-M3 ipRGCs)

| raw reads | GFP+ sample | GFP- sample | raw reads |
|-----------|-------------|-------------|-----------|
| 95016286  | DJB0007*    | DJB0008*    | 90897302  |
| 44201103  | DJB0030*    | DJB0031*    | 43690608  |
| 45578821  | DJB0028*    | DJB0029*    | 49110355  |
| 49661171  | DJB0016*    | DJB0021*    | 47265858  |
| 10724088  | DJB0036     | DJB0037     | 11294631  |
| 11377625  | DJB0038     | DJB0039     | 22789777  |

### *Opn4-Cre/ZEG* (M1-M6 ipRGCs)

| raw reads | GFP+ sample | GFP- sample | raw reads |
|-----------|-------------|-------------|-----------|
| 109774976 | DJB0005*    | DJB0006*    | 96032720  |
| 98636762  | DJB0022*    | DJB0023*    | 110267207 |
| 64188702  | DJB0032*    | DJB0035*    | 68930442  |
| 21602002  | DJB0040     | DJB0041     | 22028459  |

\* concatenated technical replicates
